# Supplementary material for: Characters related to higher starch accumulation in cassava storage roots
Source: PubMed Central journal article supplement (PMC4759534; doi:10.1038/srep19823), 2016-02-19
Supplement: srep19823-s1.pdf [file srep19823-s1.pdf]

## Characters related to higher starch accumulation in cassava storage roots

You-Zhi Li<sup>\*\*1</sup>, Jian-Yu Zhao<sup>\*1</sup>, San-Min Wu<sup>1</sup>, Xian-Wei Fan<sup>1</sup>, Xing-Lu Luo<sup>1</sup> & Bao-Shan Chen<sup>\*\*1</sup>

<sup>1</sup>State Key Laboratory for Conservation and Utilization of Subtropical Agro-bioresources; Key Laboratory of Ministry of Education for Microbial and Plant Genetic Engineering; College of Life Science and Technology, Guangxi University; 100 Daxue Road, Nanning, Guangxi 530004, P. R. China

| <b>Supplementary Table S1</b> Description of 107 genes analyzed |                                                                                                    |
|-----------------------------------------------------------------|----------------------------------------------------------------------------------------------------|
| Accession no.                                                   | Description                                                                                        |
|                                                                 | Actin of cassava as internal control                                                               |
| FG805118                                                        | Peroxidase                                                                                         |
| BM260279                                                        | SUCROSE SYNTHASE                                                                                   |
| BM260275                                                        | SUCROSE SYNTHASE ISOFORM II                                                                        |
| DQ443534                                                        | Sucrose synthase                                                                                   |
| FG805504                                                        | RHM1/ROL1 (RHAMNOSE BIOSYNTHESIS1); UDP-glucose 4,6-dehydratase/ catalytic                         |
| FG807216                                                        | Ethylene response factor                                                                           |
| FG806385                                                        | Auxin response factor-like protein                                                                 |
| FG806486                                                        | S-adenosylmethionine:2-demethylmenaquinone methyltransferase-like                                  |
| FG806743                                                        | Secretory carrier membrane protein (SCAMP) family protein                                          |
| FG806552                                                        | Auxin-responsive factor TIR1-like protein                                                          |
| DN740362                                                        | Similar to ethylene response factor                                                                |
| FG807559                                                        | Putative ripening-related protein                                                                  |
| FG807051                                                        | Late embryogenesis abundant protein Lea5                                                           |
| FG806890                                                        | Induced stolon tip protein                                                                         |
| FG806831                                                        | S-adenosyl methionine synthase-like                                                                |
| FG806176                                                        | Vacuolar protein sorting-associated protein                                                        |
| FG806323                                                        | S-adenosyl-L-methionine synthetase 1                                                               |
| FG807273                                                        | Expansin-like protein precursor                                                                    |
| FG806078                                                        | Glucose-6-phosphate/phosphate-translocator                                                         |
| FG806269                                                        | Vacuolar sorting receptor protein                                                                  |
| FG807417                                                        | Mechano sensitive ion channel domain-containing protein / MS ion channel domain-containing protein |
| FG805555                                                        | Late embryogenesis abundant protein 5                                                              |
| FG804941                                                        | Growth-on protein GRO10                                                                            |
| FG804850                                                        | AXS1 (UDP-D-APIOSE/UDP-D-XYLOSE SYNTHASE 1)                                                        |
| FG807243                                                        | Fructose-bisphosphate aldolase, putative                                                           |
| FG805261                                                        | ATCSLC12 (Cellulose synthase-like C12); transferase, transferring glycosyl groups                  |
| FG804711                                                        | ATP:ADP antiporter/ binding                                                                        |
| FG805045                                                        | Glucose-6-phosphate 1-dehydrogenase                                                                |
| FG805853                                                        | Ethylene response factor                                                                           |

|          |                                                                                                            |
|----------|------------------------------------------------------------------------------------------------------------|
| FG807023 | Putative shikimate kinase                                                                                  |
| FG806351 | Golgi transport complex protein-related                                                                    |
| FG805678 | Chloroplast glucose-6-phosphate/phosphate translocator                                                     |
| FG807054 | Regulator of gene silencing                                                                                |
| FG806004 | Expansin-like protein precursor                                                                            |
| FG806888 | Cellulose synthase catalytic subunit (UDP-forming)                                                         |
| FG806407 | Nitrogen regulatory protein P-II 2                                                                         |
| FG806208 | Seed maturation protein PM36                                                                               |
| FG807089 | Secondary cell wall-related glycosyltransferase family 8                                                   |
| FG804956 | Beta-glucosidase                                                                                           |
| FG806889 | Bell division ATP-binding protein FtsE                                                                     |
| FG805321 | Inner-membrane translocator                                                                                |
| FG805197 | Solute carrier family 12 (potassium/chloride transporters), member 9                                       |
| FG805211 | Similar to Solute carrier family 22 (organic cation transporter)                                           |
| FG807144 | Glycosyl transferase, group 1                                                                              |
| FG805259 | Solute carrier family 2, facilitated glucose transporter member 12 (Glucose transporter type 12) (GLUT-12) |
| FG806102 | Hexose carrier protein                                                                                     |
| DQ011041 | <i>Manihot esculenta</i> alpha-amylase 2 (amy2) mRNA                                                       |
| DQ017830 | <i>M. esculenta</i> alpha-amylase gene                                                                     |
| X77012   | <i>M. esculenta</i> SBE mRNA for starch branching enzyme                                                   |
| AY944584 | <i>M. esculenta</i> beta-amylase (AmyB) gene                                                               |
| AY944583 | <i>M. esculenta</i> alpha-amylase (AmyA) gene                                                              |
| X69714   | <i>M. esculenta</i> mRNA for branching enzyme (r-3).                                                       |
| X74160   | <i>M. esculenta</i> mRNA for granule-bound starch synthase                                                 |
| AF173900 | <i>M. esculenta</i> granule bound starch synthase II precursor (GBSSII)                                    |
| EF667961 | <i>M. esculenta</i> starch synthase isoform II (SSII)                                                      |
| EF667960 | <i>M. esculenta</i> starch synthase isoform I (SSI)                                                        |
| X74160   | <i>M. esculenta</i> mRNA for granule-bound starch synthase                                                 |
| AY818397 | <i>M. esculenta</i> sucrose synthase mRNA                                                                  |
| DQ443534 | <i>M. esculenta</i> sucrose synthase mRNA                                                                  |
| FG807146 | photosystem II CP47 protein                                                                                |
| BI325240 | <b>RUBISCO SUBUNIT BINDING-PROTEIN BETA SUBUNIT PRECURSOR</b>                                              |
| FG806315 | Auxin response factor 3                                                                                    |
| FG806257 | Chitin synthase export chaperone                                                                           |
| FG807524 | Chitinase                                                                                                  |
| FG806994 | Chitin synthase                                                                                            |
| FG806895 | Chitin synthase                                                                                            |
| FG807523 | Chitin synthase                                                                                            |
| FG805882 | Unnamed protein product                                                                                    |
| FG806486 | S-adenosylmethionine:2-demethylmenaquinone methyltransferase-like                                          |
| FG807035 | Thiopurine S-methyltransferase                                                                             |
| FG806240 | UDP-glucose dehydrogenase                                                                                  |
| FG806843 | Beta-fructofuranosidase                                                                                    |
| FG804902 | Hypothetical protein                                                                                       |
| FG805122 | Unnamed protein product                                                                                    |
| FG806288 | Hypothetical protein                                                                                       |
| FG805239 | Hexokinase                                                                                                 |
| FG806020 | Unnamed protein product                                                                                    |

|          |                                                            |
|----------|------------------------------------------------------------|
| FG806684 | GRP-like protein 2                                         |
| FG806755 | Unnamed protein product                                    |
| GQ227726 | Isoamylase isoform 3 mRNA                                  |
| GU229751 | Isoamylase (Meisa1) mRNA                                   |
| FG806969 | Hypothetical protein OsI_019972                            |
| FG806491 | NADP-dependent malic protein                               |
| FG806272 | Os01g0649100                                               |
| FG805296 | Pyruvate kinase, cytosolic isozyme                         |
| FG806882 | Ribose-5-phosphate isomerase                               |
| FG806288 | Hypothetical protein                                       |
| FG806342 | Arginine decarboxylase                                     |
| FG807416 | Glutamine synthetase                                       |
| FG806408 | AtTLP3 (TUBBY LIKE PROTEIN 3);                             |
| FG806896 | Peptidase T2, asparaginase 2                               |
| FG806716 | ATP synthase epsilon chain, mitochondrial                  |
| FG807008 | Mitochondrial F1-ATPase, gamma subunit                     |
| FG805710 | Mitochondrial succinate dehydrogenase iron-sulphur subunit |
| FG805581 | Fumarate hydratase, putative / fumarase, putative          |
| FG805377 | Hypothetical protein                                       |
| FG806045 | Hypothetical protein PFL_3344                              |
| FG805615 | Unnamed protein product                                    |
| FG805564 | Unknown                                                    |
| FG805866 | 6-phosphogluconate dehydrogenase                           |
| FG806368 | Pyrophosphate-dependent phosphofructo-1-kinas...           |
| FG805323 | Unnamed protein product                                    |
| FG805226 | Hypothetical protein                                       |
| FG805086 | Unnamed protein product                                    |
| FG805731 | Unnamed protein product                                    |
| FG804813 | AP2/EREBP transcription factor ERF-2                       |

## Supplementary Table S2 Primers used in qPCR

| Accession no. | F-Primer#      | Primer(5'-3')             | R-Primer#      | Primer(5'-3')            |
|---------------|----------------|---------------------------|----------------|--------------------------|
| Actin         | Me-QRP-90001_F | CCTTGACTATGAGCAGGAACCTTG  | Me-QRP-90001_R | CTTCTGGACAACGGAATCTTTTC  |
| FG805118      | Me-QRP-00001_F | TGGGGCAACTGAACGTGTTGACA   | Me-QRP-00001_R | CCTTCTTGGCAGCGGACGCC     |
| BM260279      | Me-QRP-00002_F | TTCCAGGTAGCGCGGCTCT       | Me-QRP-00002_R | CCGAGGGAGCCATGCAACGT     |
| BM260275      | Me-QRP-00003_F | CCCACCGAGATGTATCTCCCTCGC  | Me-QRP-00003_R | CCGGGGTTGGCCACCCTTTG     |
| DQ443534      | Me-QRP-00004_F | CCGGGGACCCCACTTCGTTG      | Me-QRP-00004_R | TCACGGATGCTCTGAACCGCA    |
| FG805504      | Me-QRP-00005_F | AACCTGGTGTGGTGAGCCA       | Me-QRP-00005_R | TGTTGCTTCGTGGTGCCACT     |
| FG807216      | Me-QRP-00006_F | TGTGGAGCTTTGATGACCTCCCT   | Me-QRP-00006_R | GCATGTCCAGGTGTGCTCTTACCA |
| FG806385      | Me-QRP-00007_F | TGTTGGTGTATGATCCCTGGCAGGA | Me-QRP-00007_R | TGCATCCATACCCTCCGCATCCA  |
| FG806486      | Me-QRP-00008_F | GGGAGGCAGTCTGTTGTGCA      | Me-QRP-00008_R | AAGCCAGAGCCCTAACACCCA    |
| FG806743      | Me-QRP-00009_F | GGCCTTTTATCGTGCATGAGGACA  | Me-QRP-00009_R | TGCTGGGAGTATGCCAGTCAAAGA |
| FG806552      | Me-QRP-00010_F | CGGGCAGCGACTGTCACTTCT     | Me-QRP-00010_R | CCCTGGTCACTATCCCAGCA     |
| DN740362      | Me-QRP-00011_F | TGGGAGGCTTCACTTGATGGCT    | Me-QRP-00011_R | GGGAGGTCACTAAAGCTCCACAGG |
| FG807559      | Me-QRP-00012_F | TGGGTACCCTGCAAAGTTGCA     | Me-QRP-00012_R | GGCGAAATGGGCACACCTT      |
| FG807051      | Me-QRP-00013_F | AGAGCGAGCCGCAAGCTTGG      | Me-QRP-00013_R | TAGCGTTGGCGGAGAGCGA      |
| FG806890      | Me-QRP-00014_F | ATTCCACGACGACAGCCGCG      | Me-QRP-00014_R | CGGATGAAACACCGAGGGCCG    |
| FG806831      | Me-QRP-00015_F | GCGCTACCTGTAGCAGGCTGC     | Me-QRP-00015_R | ACAACACGCCACTGTTCTGGCA   |
| FG806176      | Me-QRP-00016_F | GACAGAGCAGCAGGCTCGGC      | Me-QRP-00016_R | GCAATTGGCAAAGCCGCCA      |
| FG806323      | Me-QRP-00017_F | AGAGGGTGGCAGTGGTAGGT      | Me-QRP-00017_R | CGGCATGGCAAGAGTTTTACGC   |
| FG807273      | Me-QRP-00018_F | GCGCAAAGAGTGTCTTCTGCAGA   | Me-QRP-00018_R | GGGAGAGCAAACCTCTTGGCGC   |
| FG806078      | Me-QRP-00019_F | CAATGCCCTTGGAGCCGCCA      | Me-QRP-00019_R | CGGTACCAATCATTCCGGCCA    |
| FG806269      | Me-QRP-00020_F | GGCTTGGGAATGGCTGCTGGT     | Me-QRP-00020_R | TCAGGCACGTTGCTGTTGACA    |
| FG807417      | Me-QRP-00021_F | CAGGAGCCCAACATGGGCG       | Me-QRP-00021_R | TCAGCTCGCCACTTCTCGGA     |
| FG805555      | Me-QRP-00022_F | GGAGGGGATTAGCGGCTGC       | Me-QRP-00022_R | AGCATCCGGTGCAGGGTCT      |
| FG804941      | Me-QRP-00023_F | TGGACATGGGGGCAAGCTCT      | Me-QRP-00023_R | GGATGGCATGGCCAACCTGCA    |
| FG804850      | Me-QRP-00024_F | TCCAGCGTCAATAGTCAATGCCTCT | Me-QRP-00024_R | CGCAGCCCAAGCTCACAGGG     |
| FG807243      | Me-QRP-00025_F | GCTCTCTGCAGCACCTCGC       | Me-QRP-00025_R | AGCTTGGCGGCAGAGGACAA     |
| FG805261      | Me-QRP-00026_F | GTTGATGAAGGCAACACGC       | Me-QRP-00026_R | TGTTCTGGAGGAAGGAGGC      |
| FG804711      | Me-QRP-00027_F | CGGCGGTGAAATGAGGCTGC      | Me-QRP-00027_R | AACCGGCAAGCACACCAGCA     |
| FG805045      | Me-QRP-00028_F | CGGGGTGCGGATTACCCCTG      | Me-QRP-00028_R | CCCCAACAGGGCCCCGACTA     |
| FG805853      | Me-QRP-00029_F | GGTGCCCGTCAACAGCACA       | Me-QRP-00029_R | TCCAACGTCCACGCGAGGA      |
| FG807023      | Me-QRP-00030_F | TCCAGGTGCTTTGTGACGTGCT    | Me-QRP-00030_R | GCGACATGCAATGTTCCGCCA    |
| FG806351      | Me-QRP-00031_F | CGGAGCATTCTTCCGGGCG       | Me-QRP-00031_R | CCTTCGGTGTGTAACGGCGT     |
| FG805678      | Me-QRP-00032_F | GCTGCTGGCTCGTCCAGTCC      | Me-QRP-00032_R | TGGTGCTTTGCGAGCGTTGA     |
| FG807054      | Me-QRP-00033_F | TGACATGGACGGAGATGGGCT     | Me-QRP-00033_R | AGCCAAGGCTCCGGTTTCGT     |
| FG806004      | Me-QRP-00034_F | TGACAGATTGGAAGCCAGGA      | Me-QRP-00034_R | AGAGCAACCTCCTTTTGC       |
| FG806888      | Me-QRP-00035_F | CGGGCATGGCAATCGGTGT       | Me-QRP-00035_R | TCCTCTGTGGGATTGTGGCGT    |
| FG806407      | Me-QRP-00036_F | TGCCGGTGTGGCCGACTTG       | Me-QRP-00036_R | TGCCATTGACGACAAAAGGGGA   |
| FG806208      | Me-QRP-00037_F | TGTCTCGCCAGAGATTGCCGA     | Me-QRP-00037_R | TTAGACACCCCCACGACTCA     |
| FG807089      | Me-QRP-00038_F | GAATCAATAACTTCAGCAGCACA   | Me-QRP-00038_R | GCTTCCACAGTACCCAAACATG   |
| FG804956      | Me-QRP-00039_F | GTCACAGACCAACGTACCCTACA   | Me-QRP-00039_R | GAGTCCCGGAAACATCA        |
| FG806889      | Me-QRP-00040_F | TGGCGTCCACAGCTCAAAGTCCG   | Me-QRP-00040_R | ACCTTCGTCGAGCACTGGGA     |
| FG805321      | Me-QRP-00041_F | TGGGGCTTGAAGCTTGGGGG      | Me-QRP-00041_R | ACTTGCCGGTCTGCCATGGC     |
| FG805197      | Me-QRP-00042_F | GTGTTCCGATTTGTGTAGCGGTGT  | Me-QRP-00042_R | TTCTCACTCCACCTTCTGTGTT   |
| FG805211      | Me-QRP-00043_F | TGGGCAGCAAGTTACGGGGA      | Me-QRP-00043_R | GCCTCTGGCGGCTCATCTCC     |
| FG807144      | Me-QRP-00044_F | GGTCGTAACCTCGCTCGAGAGGC   | Me-QRP-00044_R | AGGGGATCAAACCACGAGAGTGA  |

|          |                |                             |                |                           |
|----------|----------------|-----------------------------|----------------|---------------------------|
| FG805259 | Me-QRP-00045_F | GGACCTAATGCTTGCTTGGGGG      | Me-QRP-00045_R | TGTGCAGGCAGCCATCTTATTTGC  |
| FG806102 | Me-QRP-00046_F | GCCTTTGTGACTTCTTGCTGCCG     | Me-QRP-00046_R | TCCAGAACCAGTGCTCCCTCCA    |
| DQ011041 | Me-QRP-00047_F | GGGTAACCGCAGCACTGGGG        | Me-QRP-00047_R | GGAGCCACTGCAGCCATGCT      |
| DQ017830 | Me-QRP-00048_F | GAATCATGTAACAAGGCAGAAGG     | Me-QRP-00048_R | CTGACTGAGAAGGAGGAGGAAG    |
| X77012   | Me-QRP-00049_F | TTGGGTCTGTTTCCGGCGCC        | Me-QRP-00049_R | AGGGATCTAGGACCACCAGGCA    |
| AY944584 | Me-QRP-00050_F | ACGTCCACTGGAGCGGTCAA        | Me-QRP-00050_R | CCATGGGAAGGGTGCCAATGCC    |
| AY944583 | Me-QRP-00051_F | AGGAAAGTTGACAGCGCGGGA       | Me-QRP-00051_R | TAAAGGCTGCCCTGCGACGC      |
| X69714   | Me-QRP-00052_F | TGGTTGCGACTTGCCCGGAA        | Me-QRP-00052_R | TGGCCACTCTTCCACGTCCA      |
| X74160   | Me-QRP-00053_F | ACCGGAGAGAGACCATGGCA        | Me-QRP-00053_R | TGGGTCCAGGGTCCAGTGTGA     |
| AF173900 | Me-QRP-00054_F | GCTCCGGTTTGCCATCCCC         | Me-QRP-00054_R | TCCTGACCCACCATCCAGGGA     |
| EF667961 | Me-QRP-00055_F | GGGTGAGTCCCGCTTGCACT        | Me-QRP-00055_R | CTCACAGTGCAGACGCCCC       |
| EF667960 | Me-QRP-00056_F | ATGGCCGCTTGTCGCCATCG        | Me-QRP-00056_R | TCGTGAAGTCCCAAGCCACC      |
| X74160   | Me-QRP-00053_F | ACCGGAGAGAGACCATGGCA        | Me-QRP-00053_R | TGGGTCCAGGGTCCAGTGTGA     |
| AY818397 | Me-QRP-00058_F | TGTACCATTGCTCATGCTCTGAGA    | Me-QRP-00058_R | GCCGTAAACTGGCATGAAAAGTGGT |
| DQ443534 | Me-QRP-00004_F | CCGGGGACCCCACTTCGTTG        | Me-QRP-00004_R | TCACGGATGCTCTGAACGCGA     |
| FG807146 | Me-QRP-00060_F | TTCAGGCCTGGCTCCGTTTCT       | Me-QRP-00060_R | TGGATCAACAACCCATAAGCACAAA |
| B1325240 | Me-QRP-00061_F | GATTGCCAGCAGGCACCGGT        | Me-QRP-00061_R | GCTGCCTAGAGCATGCATCATCGG  |
| FG806315 | Me-QRP-00062_F | CCTTCCAGAGGTGGGAACCTAC      | Me-QRP-00062_R | CCTTGGCACGAAAGGAATAAG     |
| FG806257 | Me-QRP-00063_F | CCAGCTCGATGCTACGCGCA        | Me-QRP-00063_R | TCTGCTCCCTGGTCCGACCG      |
| FG807524 | Me-QRP-00064_F | CCGTTGGAATCGAATGGGAACC      | Me-QRP-00064_R | CCCGGGCAAACCCCAAAGGG      |
| FG806994 | Me-QRP-00065_F | CGATCATGGGCGAGCTTATAC       | Me-QRP-00065_R | AGAACTGCAAATTCCTTAGACAAC  |
| FG806895 | Me-QRP-00066_F | GGGCGAGCTTATCGAATCTATCCC    | Me-QRP-00066_R | TAGAGGCCGAGGCGTGCGA       |
| FG807523 | Me-QRP-00067_F | GAGCTTATAAATATCTATCGAATCTTG | Me-QRP-00067_R | GAAAAGGGAGAGAGAACTGC      |
| FG805882 | Me-QRP-00068_F | GGTGGGCGATGGTGTGGGAC        | Me-QRP-00068_R | GCGCTGGAGTGGCATGGCTT      |
| FG806486 | Me-QRP-00008_F | GGGAGGCAGTCTGTGTGCA         | Me-QRP-00008_R | AAGCCAGAGCCCTAACACCCA     |
| FG807035 | Me-QRP-00070_F | GACCGGCCAAAGGGACA           | Me-QRP-00070_R | GAGCGATTGCACAGCACTCTA     |
| FG806240 | Me-QRP-00071_F | GCTCAAGGACCTGCCTGCTGT       | Me-QRP-00071_R | CTGCAGCCAGTTGACCCGCA      |
| FG806843 | Me-QRP-00072_F | CCGTTGCTGAAAGATAGTGGCT      | Me-QRP-00072_R | ACCCAGCAATCGACCATGTCTGG   |
| FG804902 | Me-QRP-00073_F | GCCTCCACGCCCAGCATTCA        | Me-QRP-00073_R | GGGGCAATGCCTGCTCAGCA      |
| FG805122 | Me-QRP-00074_F | GACTTCACAGGTAGGAGCAG        | Me-QRP-00074_R | GCTACAGAACCGCCAAAGATTG    |
| FG806288 | Me-QRP-00075_F | CATTGCGCGGCATGATGCA         | Me-QRP-00075_R | TGCCAAAACCCCTTCAAGCAGCT   |
| FG805239 | Me-QRP-00076_F | TCCGTAGCTCCATGCGAGAGCA      | Me-QRP-00076_R | GCTGCAAGGAGAGCCGCTCC      |
| FG806020 | Me-QRP-00077_F | TGGTGGGTGTCGTACCGGT         | Me-QRP-00077_R | GTGTTCCGTTCTGGCGACCCA     |
| FG806684 | Me-QRP-00078_F | TCTCATGGGCGATGGTCAGCCA      | Me-QRP-00078_R | CAAAGCCCAAGTGGTCCGA       |
| FG806755 | Me-QRP-00079_F | CAGTGTGGCAGTTCTAATGGAGGGG   | Me-QRP-00079_R | TGCAGATCCCCAGGGCAAGC      |
| GQ227726 | Me-QRP-00080_F | ATGGGCCGAGTGAACGGGA         | Me-QRP-00080_R | TCGCGCTGTACAGGTACGCA      |
| GU229751 | Me-QRP-00081_F | AAGCATGGGATGCGGGAGGC        | Me-QRP-00081_R | GCGAAAGCCCCAGCAAAGCC      |
| FG806969 | Me-QRP-00082_F | CACTCGATGGTGCCCGCTG         | Me-QRP-00082_R | TCCCCATCTTCACTGCGTCT      |
| FG806491 | Me-QRP-00083_F | GCTGCCAGGTGACCAGGA          | Me-QRP-00083_R | AGCAGCCACATTGGCCGCAA      |
| FG806272 | Me-QRP-00084_F | CCTTCCACCACCACAGCCC         | Me-QRP-00084_R | CCGGTGCTACTGGCGAAGCA      |
| FG805296 | Me-QRP-00085_F | GCCAGGTGATGCTGTTGTGCA       | Me-QRP-00085_R | CTCTTGCAACGGCCTCGCCA      |
| FG806882 | Me-QRP-00086_F | GGCTAGCAGGTGCTGTGAGCA       | Me-QRP-00086_R | AGTGACCCCAAGTCCCTGCA      |
| FG806288 | Me-QRP-00075_F | CATTGCGCGGCATGATGCA         | Me-QRP-00075_R | TGCCAAAACCCCTTCAAGCAGCT   |
| FG806342 | Me-QRP-00088_F | TCTTAAGAGAGGTGGGGAGAGA      | Me-QRP-00088_R | AGAGTGCAAGCAAACTCGCCA     |
| FG807416 | Me-QRP-00089_F | TGGGGTGTGCTAACC CGG         | Me-QRP-00089_R | TGATGCAGGCCTCCTGCTCTCA    |
| FG806408 | Me-QRP-00090_F | TGGCGACCCATGTGGCATGA        | Me-QRP-00090_R | TCGCGAGAAGCAACCAGCTGA     |
| FG806896 | Me-QRP-00091_F | AGGTCGAGCAGCACACGG          | Me-QRP-00091_R | GCTGCGGCATGGAGAGTCCC      |
| FG806716 | Me-QRP-00092_F | AGACGAAGCCTCACTCGCGA        | Me-QRP-00092_R | ACGAAGAGTGGGTTTCTGGGGCT   |
| FG807008 | Me-QRP-00093_F | CCTCGAGTGAGATGCTCCCG        | Me-QRP-00093_R | TGCTGGCGAGATGCTTGATCGT    |

|          |                |                         |                |                          |
|----------|----------------|-------------------------|----------------|--------------------------|
| FG805710 | Me-QRP-00094_F | TGGGGCCAGCTGCTTTGCTC    | Me-QRP-00094_R | TTGGACAGGCACGGGCACAA     |
| FG805581 | Me-QRP-00095_F | ATAGGGAATAATGGTGAGTGGTG | Me-QRP-00095_R | ATGTTCTAATCCGACAAATAAGAG |
| FG805377 | Me-QRP-00096_F | GGCCAAGATGCGCTCTCTGGG   | Me-QRP-00096_R | TGGCCTGCTTGCAAATGCCTGT   |
| FG806045 | Me-QRP-00097_F | TGCGCAATGAGCCGCGAGAA    | Me-QRP-00097_R | TGGGGGTGATCAGCCAGCCA     |
| FG805615 | Me-QRP-00098_F | GTGAGGCAAACACACCCCA     | Me-QRP-00098_R | GCGGGGCTCGTGTGAAAA       |
| FG805564 | Me-QRP-00099_F | GAGCGTCAGTCTGCCTGGCG    | Me-QRP-00099_R | GCTGGCAACCTTCCCTTCGGT    |
| FG805866 | Me-QRP-00100_F | GGACCATCGAGGCCGCCATG    | Me-QRP-00100_R | TTTGCTGGCGGGAGCGGAAG     |
| FG806368 | Me-QRP-00101_F | TGGGAATTGTGCTGACGACCTCA | Me-QRP-00101_R | ACCGGATCTCGCGGTAGGT      |
| FG805323 | Me-QRP-00102_F | TCGAGGGAAGGCTGCAGTTGC   | Me-QRP-00102_R | ACCCTCTGCTTCTTGGCACCT    |
| FG805226 | Me-QRP-00103_F | GGCAGGCAGGTTGGCATCATGT  | Me-QRP-00103_R | TCTCCAGCAAAGATGCCTTGAGCC |
| FG805086 | Me-QRP-00104_F | TGGTTTGCCGACCAGTCTCCTGT | Me-QRP-00104_R | TGGTTGCAAGGGTAAGGGCA     |
| FG805731 | Me-QRP-00105_F | TCCGCCACTGTCAAGAAGGAGT  | Me-QRP-00105_R | CCTTGGGCAAGCAAGGGCCA     |
| FG804813 | Me-QRP-00106_F | TGTCCGTGCTGGCTCGGGA     | Me-QRP-00106_R | TTGTCGCCACGGATGCGCTT     |

| Supplementary Table S3 qPCR cycles of the genes in H124 at 'seedling' |                     |             |       |       |        |            |       |       |        |            |       |       |        |
|-----------------------------------------------------------------------|---------------------|-------------|-------|-------|--------|------------|-------|-------|--------|------------|-------|-------|--------|
|                                                                       | Sample<br>primer ID | H124 leaves |       |       |        | H124 stems |       |       |        | H124 roots |       |       |        |
|                                                                       |                     | Ct1         | Ct2   | Ct3   | Ave.Ct | Ct1        | Ct2   | Ct3   | Ave.Ct | Ct1        | Ct2   | Ct3   | Ave.Ct |
| 1                                                                     | Me-QRP-90001        | 24.18       | 23.99 | 23.94 | 24.04  | 24.71      | 24.72 | 24.61 | 24.68  | 24.47      | 24.41 | 24.57 | 24.48  |
| 2                                                                     | Me-QRP-00001        | 27.11       | 27.07 | 27.03 | 27.07  | 25.88      | 25.80 | 25.76 | 25.81  | 23.05      | 23.16 | 23.21 | 23.14  |
| 3                                                                     | Me-QRP-00002        | 28.73       | 28.59 | 28.62 | 28.65  | 26.05      | 26.01 | 25.88 | 25.98  | 22.73      | 22.83 | 22.73 | 22.76  |
| 4                                                                     | Me-QRP-00003        | 0.00        | 0.00  | 0.00  | 0.00   | 0.00       | 0.00  | 0.00  | 0.00   | 0.00       | 0.00  | 0.00  | 0.00   |
| 5                                                                     | Me-QRP-00004        | 33.59       | 32.81 | 32.95 | 33.12  | 27.25      | 26.95 | 26.85 | 27.02  | 25.52      | 25.77 | 25.82 | 25.70  |
| 6                                                                     | Me-QRP-00005        | 26.07       | 25.77 | 25.81 | 25.89  | 27.76      | 27.38 | 27.40 | 27.52  | 25.51      | 25.49 | 25.74 | 25.58  |
| 7                                                                     | Me-QRP-00006        | 29.57       | 28.77 | 29.01 | 29.12  | 28.69      | 28.33 | 28.22 | 28.41  | 23.61      | 23.49 | 23.45 | 23.52  |
| 8                                                                     | Me-QRP-00007        | 28.88       | 28.97 | 28.70 | 28.85  | 29.64      | 29.72 | 29.64 | 29.67  | 25.47      | 25.58 | 25.55 | 25.53  |
| 9                                                                     | Me-QRP-00008        | 28.44       | 28.07 | 28.02 | 28.18  | 28.01      | 27.79 | 27.80 | 27.87  | 24.35      | 24.07 | 24.59 | 24.33  |
| 10                                                                    | Me-QRP-00009        | 30.03       | 30.08 | 30.11 | 30.07  | 26.89      | 26.76 | 26.78 | 26.81  | 24.96      | 24.95 | 25.12 | 25.01  |
| 11                                                                    | Me-QRP-00010        | 32.33       | 32.06 | 32.23 | 32.20  | 33.92      | 33.66 | 33.23 | 33.60  | 31.75      | 31.92 | 31.62 | 31.76  |
| 12                                                                    | Me-QRP-00011        | 27.51       | 27.26 | 27.27 | 27.35  | 27.65      | 27.18 | 27.13 | 27.32  | 23.49      | 23.53 | 23.41 | 23.48  |
| 13                                                                    | Me-QRP-00012        | 23.92       | 23.56 | 23.73 | 23.74  | 28.37      | 28.24 | 27.98 | 28.20  | 26.74      | 26.71 | 24.26 | 25.90  |
| 14                                                                    | Me-QRP-00013        | 29.70       | 29.48 | 29.28 | 29.49  | 29.75      | 29.83 | 29.63 | 29.73  | 26.93      | 26.99 | 27.01 | 26.98  |
| 15                                                                    | Me-QRP-00014        | 27.03       | 26.91 | 26.79 | 26.91  | 26.82      | 26.52 | 26.31 | 26.55  | 25.02      | 25.13 | 25.15 | 25.10  |
| 16                                                                    | Me-QRP-00015        | 26.28       | 26.10 | 26.13 | 26.17  | 26.30      | 26.37 | 26.10 | 26.26  | 23.91      | 23.81 | 23.83 | 23.85  |
| 17                                                                    | Me-QRP-00016        | 27.99       | 27.92 | 27.87 | 27.93  | 26.92      | 26.97 | 26.85 | 26.91  | 26.84      | 26.72 | 27.49 | 27.02  |
| 18                                                                    | Me-QRP-00017        | 26.24       | 26.17 | 26.45 | 26.29  | 25.67      | 25.29 | 25.16 | 25.37  | 24.93      | 25.07 | 24.99 | 25.00  |
| 19                                                                    | Me-QRP-00018        | 28.82       | 28.81 | 28.76 | 28.80  | 27.50      | 27.45 | 27.33 | 27.43  | 25.25      | 25.38 | 25.38 | 25.34  |
| 20                                                                    | Me-QRP-00019        | 29.31       | 29.14 | 29.37 | 29.28  | 30.90      | 31.28 | 30.95 | 31.04  | 30.75      | 30.21 | 30.27 | 30.41  |
| 21                                                                    | Me-QRP-00020        | 28.18       | 27.73 | 27.74 | 27.89  | 28.75      | 28.79 | 28.66 | 28.73  | 26.67      | 26.80 | 26.77 | 26.74  |
| 22                                                                    | Me-QRP-00021        | 31.45       | 31.52 | 31.32 | 31.43  | 35.18      | 34.06 | 34.06 | 34.43  | 31.51      | 31.16 | 31.13 | 31.27  |
| 23                                                                    | Me-QRP-00022        | 24.15       | 23.83 | 23.94 | 23.97  | 29.09      | 28.79 | 28.73 | 28.87  | 26.57      | 26.26 | 26.28 | 26.37  |
| 24                                                                    | Me-QRP-00023        | 27.74       | 27.61 | 27.57 | 27.64  | 27.60      | 27.61 | 27.40 | 27.54  | 25.77      | 25.72 | 25.80 | 25.76  |
| 25                                                                    | Me-QRP-00024        | 28.47       | 28.44 | 28.24 | 28.39  | 28.31      | 28.40 | 28.26 | 28.32  | 25.82      | 25.60 | 25.89 | 25.77  |
| 26                                                                    | Me-QRP-00025        | 37.63       | 36.94 | 35.83 | 36.80  | 35.54      | 35.54 | 35.64 | 35.57  | 33.10      | 32.96 | 33.69 | 33.25  |
| 27                                                                    | Me-QRP-00026        | 29.99       | 30.02 | 30.00 | 30.01  | 31.87      | 31.20 | 31.60 | 31.56  | 29.10      | 29.12 | 29.01 | 29.08  |
| 28                                                                    | Me-QRP-00027        | 26.93       | 26.75 | 26.99 | 26.89  | 28.27      | 28.12 | 27.98 | 28.12  | 26.25      | 26.44 | 26.52 | 26.40  |
| 29                                                                    | Me-QRP-00028        | 31.79       | 31.45 | 31.76 | 31.67  | 37.77      | 37.52 | 36.32 | 37.20  | 28.96      | 28.63 | 28.56 | 28.72  |
| 30                                                                    | Me-QRP-00029        | 0.00        | 0.00  | 0.00  | 0.00   | 0.00       | 0.00  | 0.00  | 0.00   | 0.00       | 0.00  | 0.00  | 0.00   |
| 31                                                                    | Me-QRP-00030        | 29.89       | 29.39 | 29.53 | 29.60  | 31.50      | 31.56 | 31.24 | 31.44  | 29.47      | 29.43 | 29.31 | 29.40  |
| 32                                                                    | Me-QRP-00031        | 29.98       | 29.82 | 29.87 | 29.89  | 31.10      | 31.13 | 30.94 | 31.05  | 29.05      | 29.04 | 29.02 | 29.04  |
| 33                                                                    | Me-QRP-00032        | 27.75       | 27.66 | 27.74 | 27.72  | 27.55      | 27.59 | 27.44 | 27.53  | 24.90      | 24.93 | 24.98 | 24.94  |
| 34                                                                    | Me-QRP-00033        | 31.24       | 30.84 | 31.29 | 31.12  | 29.35      | 29.18 | 29.14 | 29.22  | 27.71      | 27.79 | 27.73 | 27.74  |
| 35                                                                    | Me-QRP-00034        | 33.62       | 31.76 | 31.95 | 32.45  | 33.45      | 33.14 | 32.71 | 33.10  | 0.00       | 0.00  | 0.00  | 0.00   |
| 36                                                                    | Me-QRP-00035        | 0.00        | 0.00  | 0.00  | 0.00   | 0.00       | 0.00  | 0.00  | 0.00   | 0.00       | 37.99 | 0.00  | 0.00   |
| 37                                                                    | Me-QRP-00036        | 0.00        | 0.00  | 0.00  | 0.00   | 0.00       | 0.00  | 0.00  | 0.00   | 0.00       | 0.00  | 0.00  | 0.00   |
| 38                                                                    | Me-QRP-00037        | 32.42       | 32.22 | 32.02 | 32.22  | 32.95      | 32.99 | 32.76 | 32.90  | 31.08      | 30.99 | 31.01 | 31.03  |
| 39                                                                    | Me-QRP-00038        | 29.87       | 29.88 | 29.93 | 29.89  | 31.81      | 31.72 | 31.38 | 31.64  | 28.97      | 28.71 | 28.90 | 28.86  |
| 40                                                                    | Me-QRP-00039        | 0.00        | 0.00  | 0.00  | 0.00   | 0.00       | 0.00  | 0.00  | 0.00   | 0.00       | 0.00  | 0.00  | 0.00   |
| 41                                                                    | Me-QRP-00040        | 36.92       | 36.12 | 36.60 | 36.55  | 35.78      | N/A   | 38.27 | 37.02  | 37.39      | 38.21 | 37.68 | 37.76  |
| 42                                                                    | Me-QRP-00041        | 28.91       | 28.37 | 28.49 | 28.59  | 24.87      | 24.83 | 24.70 | 24.80  | 24.28      | 24.28 | 24.37 | 24.31  |
| 43                                                                    | Me-QRP-00042        | 31.42       | 31.23 | 31.09 | 31.25  | 32.55      | 32.56 | 32.41 | 32.51  | 32.35      | 32.26 | 32.14 | 32.25  |
| 44                                                                    | Me-QRP-00043        | 26.91       | 27.00 | 26.87 | 26.93  | 26.69      | 26.82 | 26.74 | 26.75  | 25.69      | 25.71 | 25.80 | 25.73  |
| 45                                                                    | Me-QRP-00044        | 0.00        | 0.00  | 0.00  | 0.00   | 0.00       | 0.00  | 0.00  | 0.00   | 0.00       | 0.00  | 0.00  | 0.00   |
| 46                                                                    | Me-QRP-00045        | 27.32       | 27.31 | 27.22 | 27.29  | 28.38      | 28.43 | 27.98 | 28.26  | 26.09      | 26.20 | 26.35 | 26.21  |
| 47                                                                    | Me-QRP-00046        | 30.49       | 30.43 | 30.43 | 30.45  | 33.32      | 33.47 | 32.91 | 33.23  | 30.12      | 30.22 | 30.31 | 30.22  |
| 48                                                                    | Me-QRP-00047        | 27.66       | 27.26 | 27.45 | 27.45  | 28.89      | 28.91 | 28.98 | 28.93  | 28.83      | 28.77 | 28.43 | 28.68  |
| 49                                                                    | Me-QRP-00048        | 31.22       | 31.23 | 31.16 | 31.20  | 35.45      | 35.31 | 36.23 | 35.66  | 32.61      | 32.70 | 33.03 | 32.78  |
| 50                                                                    | Me-QRP-00049        | 31.91       | 32.04 | 31.59 | 31.85  | 30.87      | 30.67 | 30.91 | 30.82  | 23.33      | 25.57 | 25.16 | 24.68  |
| 51                                                                    | Me-QRP-00050        | 29.72       | 29.73 | 29.48 | 29.64  | 36.15      | 37.02 | 37.18 | 36.78  | 30.86      | 30.94 | 31.20 | 31.00  |
| 52                                                                    | Me-QRP-00051        | 0.00        | 0.00  | 0.00  | 0.00   | 0.00       | 0.00  | 0.00  | 0.00   | 0.00       | 0.00  | 37.56 | 37.56  |
| 53                                                                    | Me-QRP-00052        | 28.43       | 28.23 | 28.19 | 28.28  | 27.91      | 27.72 | 27.73 | 27.79  | 26.95      | 27.16 | 27.12 | 27.08  |
| 54                                                                    | Me-QRP-00053        | 23.55       | 23.34 | 23.44 | 23.45  | 35.02      | 35.75 | 35.77 | 35.52  | 28.27      | 28.47 | 28.36 | 28.37  |
| 55                                                                    | Me-QRP-00054        | 25.56       | 25.25 | 25.28 | 25.36  | 28.40      | 28.18 | 28.01 | 28.20  | 29.05      | 29.07 | 28.85 | 28.99  |
| 56                                                                    | Me-QRP-00055        | 24.95       | 24.60 | 24.61 | 24.72  | 27.56      | 27.44 | 27.47 | 27.49  | 30.16      | 29.95 | 30.36 | 30.16  |
| 57                                                                    | Me-QRP-00056        | 28.96       | 28.76 | 28.67 | 28.80  | 30.06      | 29.90 | 29.60 | 29.85  | 30.04      | 29.96 | 29.96 | 29.99  |
| 58                                                                    | Me-QRP-00053        | 23.55       | 23.34 | 23.44 | 23.45  | 35.02      | 35.75 | 35.77 | 35.52  | 28.27      | 28.47 | 28.36 | 28.37  |
| 59                                                                    | Me-QRP-00058        | 26.28       | 25.67 | 25.51 | 25.82  | 0.00       | 0.00  | 0.00  | 0.00   | 25.59      | 25.68 | 25.58 | 25.62  |
| 60                                                                    | Me-QRP-00004        | 33.59       | 32.81 | 32.95 | 33.12  | 27.25      | 26.95 | 26.85 | 27.02  | 25.52      | 25.77 | 25.82 | 25.70  |

|     |              |       |       |       |       |       |       |       |       |       |       |       |       |
|-----|--------------|-------|-------|-------|-------|-------|-------|-------|-------|-------|-------|-------|-------|
| 61  | Me-QRP-00060 | 27.42 | 27.09 | 27.14 | 27.22 | 29.95 | 30.01 | 29.71 | 29.89 | 27.93 | 28.20 | 28.07 | 28.06 |
| 62  | Me-QRP-00061 | 23.97 | 23.73 | 23.60 | 23.77 | 25.37 | 25.02 | 24.93 | 25.11 | 26.58 | 26.79 | 26.88 | 26.75 |
| 63  | Me-QRP-00062 | 0.00  | 0.00  | 0.00  | 0.00  | 0.00  | 0.00  | 0.00  | 0.00  | 0.00  | 0.00  | 0.00  | 0.00  |
| 64  | Me-QRP-00063 | 0.00  | 0.00  | 0.00  | 0.00  | 0.00  | 0.00  | 0.00  | 0.00  | 35.80 | 36.84 | 35.72 | 36.12 |
| 65  | Me-QRP-00064 | 30.23 | 29.92 | 30.06 | 30.07 | 29.55 | 29.45 | 29.33 | 29.45 | 27.04 | 27.14 | 27.00 | 27.06 |
| 66  | Me-QRP-00065 | 30.87 | 30.30 | 30.15 | 30.44 | 32.61 | 31.79 | 31.38 | 31.93 | 29.42 | 29.72 | 29.55 | 29.57 |
| 67  | Me-QRP-00066 | 0.00  | 0.00  | 0.00  | 0.00  | 0.00  | 0.00  | 0.00  | 0.00  | 38.01 | 0.00  | 0.00  | 0.00  |
| 68  | Me-QRP-00067 | 0.00  | 0.00  | 0.00  | 0.00  | 0.00  | 0.00  | 0.00  | 0.00  | 0.00  | 0.00  | 0.00  | 0.00  |
| 69  | Me-QRP-00068 | 0.00  | 0.00  | 0.00  | 0.00  | 0.00  | 0.00  | 0.00  | 0.00  | 0.00  | 0.00  | 0.00  | 0.00  |
| 70  | Me-QRP-00008 | 28.44 | 28.07 | 28.02 | 28.18 | 28.01 | 27.79 | 27.80 | 27.87 | 24.35 | 24.07 | 24.59 | 24.33 |
| 71  | Me-QRP-00070 | 0.00  | 0.00  | 0.00  | 0.00  | 0.00  | 0.00  | 0.00  | 0.00  | 0.00  | 0.00  | 0.00  | 0.00  |
| 72  | Me-QRP-00071 | 28.14 | 27.53 | 27.89 | 27.85 | 25.98 | 25.85 | 25.81 | 25.88 | 24.63 | 24.78 | 24.75 | 24.72 |
| 73  | Me-QRP-00072 | 0.00  | 0.00  | 0.00  | 0.00  | 0.00  | 0.00  | 0.00  | 0.00  | 0.00  | 0.00  | 0.00  | 0.00  |
| 74  | Me-QRP-00073 | 27.86 | 27.75 | 27.53 | 27.71 | 27.35 | 27.12 | 27.08 | 27.18 | 28.15 | 27.97 | 27.88 | 28.00 |
| 75  | Me-QRP-00074 | 29.17 | 29.19 | 28.97 | 29.11 | 31.41 | 31.72 | 31.40 | 31.51 | 27.30 | 27.61 | 27.60 | 27.51 |
| 76  | Me-QRP-00075 | 24.08 | 24.00 | 23.98 | 24.02 | 25.10 | 25.22 | 25.07 | 25.13 | 23.29 | 23.23 | 23.35 | 23.29 |
| 77  | Me-QRP-00076 | 27.31 | 27.39 | 27.55 | 27.41 | 29.43 | 29.13 | 29.21 | 29.26 | 27.99 | 28.01 | 28.07 | 28.02 |
| 78  | Me-QRP-00077 | 27.72 | 27.89 | 27.31 | 27.64 | 27.56 | 27.26 | 27.19 | 27.34 | 26.95 | 26.96 | 26.93 | 26.95 |
| 79  | Me-QRP-00078 | 28.65 | 28.53 | 28.50 | 28.56 | 29.02 | 28.92 | 29.02 | 28.98 | 28.75 | 28.73 | 28.96 | 28.82 |
| 80  | Me-QRP-00079 | 28.65 | 28.53 | 28.50 | 28.56 | 29.02 | 28.92 | 29.02 | 28.98 | 29.74 | 29.50 | 29.90 | 29.72 |
| 81  | Me-QRP-00080 | 33.88 | 33.35 | 32.81 | 33.35 | 33.11 | 33.15 | 32.78 | 33.01 | 30.12 | 30.37 | 30.39 | 30.29 |
| 82  | Me-QRP-00081 | 29.81 | 28.71 | 29.54 | 29.35 | 29.15 | 29.15 | 27.99 | 28.76 | 27.98 | 28.03 | 28.07 | 28.03 |
| 83  | Me-QRP-00082 | 28.13 | 28.26 | 28.20 | 28.20 | 29.41 | 29.57 | 29.44 | 29.47 | 28.29 | 28.37 | 28.40 | 28.35 |
| 84  | Me-QRP-00083 | 29.64 | 29.41 | 29.02 | 29.36 | 28.69 | 28.23 | 28.06 | 28.33 | 28.57 | 28.50 | 28.55 | 28.54 |
| 85  | Me-QRP-00084 | 25.92 | 25.71 | 25.65 | 25.76 | 28.35 | 28.08 | 28.03 | 28.15 | 26.54 | 26.70 | 26.60 | 26.62 |
| 86  | Me-QRP-00085 | 26.24 | 26.15 | 26.14 | 26.18 | 27.53 | 27.24 | 26.90 | 27.22 | 25.58 | 25.68 | 25.58 | 25.62 |
| 87  | Me-QRP-00086 | 27.24 | 27.08 | 27.12 | 27.15 | 26.06 | 26.07 | 26.01 | 26.05 | 26.70 | 26.25 | 26.43 | 26.46 |
| 88  | Me-QRP-00075 | 24.08 | 24.00 | 23.98 | 24.02 | 25.10 | 25.22 | 25.07 | 25.13 | 23.29 | 23.23 | 23.35 | 23.29 |
| 89  | Me-QRP-00088 | 27.38 | 27.03 | 27.12 | 27.18 | 26.88 | 26.67 | 26.62 | 26.72 | 25.25 | 25.36 | 25.40 | 25.34 |
| 90  | Me-QRP-00089 | 28.15 | 27.89 | 27.87 | 27.97 | 28.23 | 27.94 | 27.75 | 27.97 | 26.58 | 26.66 | 26.58 | 26.61 |
| 91  | Me-QRP-00090 | 30.65 | 30.36 | 29.23 | 30.08 | 31.27 | 31.64 | 31.19 | 31.36 | 31.56 | 31.72 | 31.59 | 31.63 |
| 92  | Me-QRP-00091 | 26.20 | 26.04 | 25.91 | 26.05 | 29.20 | 29.15 | 28.99 | 29.11 | 28.03 | 27.92 | 28.07 | 28.01 |
| 93  | Me-QRP-00092 | 28.32 | 28.13 | 27.97 | 28.14 | 28.23 | 27.88 | 27.72 | 27.94 | 26.10 | 25.98 | 26.20 | 26.10 |
| 94  | Me-QRP-00093 | 27.95 | 27.57 | 27.69 | 27.74 | 28.68 | 28.28 | 28.20 | 28.39 | 26.08 | 26.13 | 26.13 | 26.11 |
| 95  | Me-QRP-00094 | 30.61 | 30.15 | 30.85 | 30.54 | 30.21 | 29.97 | 29.70 | 29.96 | 26.45 | 26.36 | 26.50 | 26.44 |
| 96  | Me-QRP-00095 | 26.92 | 26.72 | 26.75 | 26.80 | 28.79 | 28.92 | 28.50 | 28.74 | 25.98 | 26.08 | 26.19 | 26.08 |
| 97  | Me-QRP-00096 | 26.59 | 26.26 | 26.40 | 26.42 | 28.18 | 28.38 | 28.11 | 28.22 | 27.70 | 27.55 | 27.48 | 27.58 |
| 98  | Me-QRP-00097 | 0.00  | 0.00  | 0.00  | 0.00  | 0.00  | 0.00  | 0.00  | 0.00  | 0.00  | 0.00  | 0.00  | 0.00  |
| 99  | Me-QRP-00098 | 27.57 | 27.44 | 27.21 | 27.41 | 26.97 | 27.11 | 27.11 | 27.06 | 24.96 | 25.08 | 25.04 | 25.03 |
| 100 | Me-QRP-00099 | 29.16 | 29.44 | 29.24 | 29.28 | 37.13 | 37.99 | 36.69 | 37.27 | 27.34 | 27.42 | 27.44 | 27.40 |
| 101 | Me-QRP-00100 | 0.00  | 0.00  | 0.00  | 0.00  | 0.00  | 0.00  | 0.00  | 0.00  | 33.91 | 32.82 | 32.92 | 33.22 |
| 102 | Me-QRP-00101 | 33.79 | 33.82 | 33.55 | 33.72 | 36.05 | 35.66 | 35.97 | 35.90 | 32.06 | 32.07 | 32.17 | 32.10 |
| 103 | Me-QRP-00102 | 30.29 | 29.74 | 29.78 | 29.94 | 28.10 | 27.79 | 27.65 | 27.84 | 26.79 | 26.73 | 26.71 | 26.74 |
| 104 | Me-QRP-00103 | 29.89 | 29.72 | 29.64 | 29.75 | 29.74 | 29.61 | 29.33 | 29.56 | 28.58 | 28.29 | 28.24 | 28.37 |
| 105 | Me-QRP-00104 | 27.38 | 27.04 | 26.85 | 27.09 | 28.40 | 28.04 | 27.84 | 28.10 | 24.21 | 24.16 | 24.02 | 24.13 |
| 106 | Me-QRP-00105 | 26.80 | 26.63 | 26.50 | 26.65 | 28.19 | 28.37 | 28.05 | 28.20 | 25.75 | 25.65 | 25.59 | 25.66 |
| 107 | Me-QRP-00106 | 29.73 | 29.34 | 29.58 | 29.55 | 29.78 | 29.31 | 29.15 | 29.41 | 27.93 | 27.85 | 27.75 | 27.84 |



| <b>Supplementary Table S4 qPCR cycles of the genes in F01 at 'seedling'</b> |              |            |       |       |        |           |       |       |        |           |       |       |        |
|-----------------------------------------------------------------------------|--------------|------------|-------|-------|--------|-----------|-------|-------|--------|-----------|-------|-------|--------|
|                                                                             | Sample       | F01 leaves |       |       |        | F01 stems |       |       |        | F01 roots |       |       |        |
|                                                                             | primer ID    | Ct1        | Ct2   | Ct3   | Ave.Ct | Ct1       | Ct2   | Ct3   | Ave.Ct | Ct1       | Ct2   | Ct3   | Ave.Ct |
| 1                                                                           | Me-QRP-90001 | 24.06      | 24.10 | 23.97 | 24.04  | 23.26     | 23.13 | 23.04 | 23.14  | 24.30     | 24.20 | 23.85 | 24.12  |
| 2                                                                           | Me-QRP-00001 | 26.66      | 26.64 | 26.68 | 26.66  | 23.45     | 23.25 | 23.21 | 23.30  | 21.90     | 22.06 | 21.92 | 21.96  |
| 3                                                                           | Me-QRP-00002 | 28.77      | 28.57 | 28.79 | 28.71  | 25.08     | 24.92 | 24.86 | 24.95  | 22.05     | 22.01 | 22.00 | 22.02  |
| 4                                                                           | Me-QRP-00003 | 0.00       | 0.00  | 0.00  | 0.00   | 0.00      | 0.00  | 0.00  | 0.00   | 0.00      | 37.92 | 0.00  | 0.00   |
| 5                                                                           | Me-QRP-00004 | 32.59      | 32.34 | 32.14 | 32.36  | 26.12     | 25.92 | 25.84 | 25.96  | 25.01     | 24.85 | 24.92 | 24.92  |
| 6                                                                           | Me-QRP-00005 | 25.89      | 25.52 | 25.47 | 25.63  | 24.50     | 24.18 | 24.10 | 24.26  | 25.03     | 24.90 | 24.94 | 24.96  |
| 7                                                                           | Me-QRP-00006 | 28.52      | 28.46 | 28.43 | 28.47  | 25.73     | 25.56 | 25.56 | 25.62  | 22.88     | 22.85 | 22.76 | 22.83  |
| 8                                                                           | Me-QRP-00007 | 29.32      | 29.14 | 29.27 | 29.24  | 27.32     | 27.23 | 27.14 | 27.23  | 25.63     | 25.44 | 25.19 | 25.42  |
| 9                                                                           | Me-QRP-00008 | 28.07      | 27.93 | 27.93 | 27.97  | 26.51     | 26.32 | 26.11 | 26.32  | 23.70     | 23.46 | 23.57 | 23.58  |
| 10                                                                          | Me-QRP-00009 | 25.71      | 25.91 | 25.84 | 25.82  | 29.42     | 29.19 | 29.34 | 29.32  | 24.15     | 24.11 | 24.08 | 24.11  |
| 11                                                                          | Me-QRP-00010 | 33.21      | 32.93 | 32.95 | 33.03  | 32.16     | 31.98 | 31.58 | 31.91  | 31.53     | 31.26 | 31.36 | 31.38  |
| 12                                                                          | Me-QRP-00011 | 27.31      | 27.37 | 27.31 | 27.33  | 25.36     | 25.19 | 25.14 | 25.23  | 22.88     | 22.84 | 22.66 | 22.79  |
| 13                                                                          | Me-QRP-00012 | 24.03      | 24.03 | 23.97 | 24.01  | 26.50     | 26.21 | 26.12 | 26.28  | 23.39     | 22.53 | 20.29 | 22.07  |
| 14                                                                          | Me-QRP-00013 | 28.53      | 28.39 | 28.55 | 28.49  | 24.00     | 23.99 | 24.05 | 24.01  | 26.43     | 26.41 | 26.20 | 26.34  |
| 15                                                                          | Me-QRP-00014 | 26.52      | 26.47 | 26.75 | 26.58  | 23.60     | 23.46 | 23.76 | 23.61  | 24.98     | 24.88 | 24.92 | 24.93  |
| 16                                                                          | Me-QRP-00015 | 26.63      | 26.40 | 26.41 | 26.48  | 23.75     | 23.71 | 23.76 | 23.74  | 22.68     | 22.74 | 22.68 | 22.70  |
| 17                                                                          | Me-QRP-00016 | 28.38      | 28.25 | 28.25 | 28.30  | 24.75     | 24.62 | 24.42 | 24.59  | 26.98     | 26.79 | 26.84 | 26.87  |
| 18                                                                          | Me-QRP-00017 | 25.49      | 26.10 | 26.04 | 25.88  | 22.76     | 22.34 | 22.25 | 22.45  | 24.52     | 24.59 | 24.29 | 24.47  |
| 19                                                                          | Me-QRP-00018 | 28.87      | 28.83 | 28.85 | 28.85  | 24.11     | 23.93 | 23.86 | 23.97  | 25.60     | 25.42 | 25.45 | 25.49  |
| 20                                                                          | Me-QRP-00019 | 28.41      | 28.24 | 28.27 | 28.31  | 27.58     | 27.33 | 27.30 | 27.40  | 29.84     | 29.44 | 29.31 | 29.53  |
| 21                                                                          | Me-QRP-00020 | 28.07      | 27.99 | 27.93 | 28.00  | 26.82     | 26.58 | 26.47 | 26.62  | 26.18     | 26.12 | 26.17 | 26.15  |
| 22                                                                          | Me-QRP-00021 | 31.86      | 31.81 | 31.86 | 31.84  | 31.57     | 31.07 | 31.01 | 31.22  | 31.04     | 31.21 | 31.16 | 31.14  |
| 23                                                                          | Me-QRP-00022 | 23.66      | 23.62 | 23.50 | 23.59  | 25.21     | 25.10 | 25.03 | 25.11  | 26.53     | 26.61 | 26.44 | 26.53  |
| 24                                                                          | Me-QRP-00023 | 28.24      | 28.10 | 28.16 | 28.17  | 26.23     | 26.07 | 26.04 | 26.11  | 25.86     | 25.58 | 25.43 | 25.63  |
| 25                                                                          | Me-QRP-00024 | 28.14      | 28.21 | 28.22 | 28.19  | 25.94     | 25.77 | 25.59 | 25.77  | 24.73     | 24.75 | 24.65 | 24.71  |
| 26                                                                          | Me-QRP-00025 | 36.89      | 36.78 | 36.06 | 36.58  | 33.31     | 33.44 | 33.72 | 33.49  | 32.11     | 32.13 | 32.27 | 32.17  |
| 27                                                                          | Me-QRP-00026 | 30.74      | 30.63 | 30.45 | 30.61  | 28.50     | 28.26 | 28.40 | 28.39  | 28.41     | 28.25 | 28.32 | 28.33  |
| 28                                                                          | Me-QRP-00027 | 26.94      | 27.00 | 26.94 | 26.96  | 25.86     | 25.73 | 25.80 | 25.80  | 25.46     | 25.19 | 25.20 | 25.28  |
| 29                                                                          | Me-QRP-00028 | 32.43      | 31.86 | 32.51 | 32.27  | 35.10     | 36.14 | 35.71 | 35.65  | 27.33     | 27.25 | 27.24 | 27.27  |
| 30                                                                          | Me-QRP-00029 | 0.00       | 0.00  | 0.00  | 0.00   | 0.00      | 0.00  | 0.00  | 0.00   | 0.00      | 0.00  | 0.00  | 0.00   |
| 31                                                                          | Me-QRP-00030 | 29.84      | 29.89 | 29.90 | 29.88  | 29.58     | 29.54 | 29.37 | 29.50  | 28.27     | 28.30 | 28.43 | 28.33  |
| 32                                                                          | Me-QRP-00031 | 30.73      | 30.41 | 30.35 | 30.49  | 29.19     | 29.38 | 29.10 | 29.22  | 28.31     | 28.03 | 28.08 | 28.14  |
| 33                                                                          | Me-QRP-00032 | 28.81      | 28.60 | 28.75 | 28.72  | 26.05     | 25.89 | 25.87 | 25.93  | 24.55     | 24.36 | 24.24 | 24.38  |
| 34                                                                          | Me-QRP-00033 | 31.10      | 30.81 | 30.76 | 30.89  | 25.06     | 24.94 | 24.84 | 24.95  | 28.18     | 28.17 | 28.37 | 28.24  |
| 35                                                                          | Me-QRP-00034 | 33.65      | 33.05 | 33.27 | 33.32  | 32.51     | 32.14 | 32.39 | 32.35  | 0.00      | 0.00  | 0.00  | 0.00   |
| 36                                                                          | Me-QRP-00035 | 0.00       | 0.00  | 0.00  | 0.00   | 0.00      | 0.00  | 0.00  | 0.00   | 36.08     | 38.52 | 38.29 | 37.63  |
| 37                                                                          | Me-QRP-00036 | 0.00       | 0.00  | 0.00  | 0.00   | 0.00      | 0.00  | 0.00  | 0.00   | 0.00      | 0.00  | 0.00  | 0.00   |
| 38                                                                          | Me-QRP-00037 | 32.78      | 32.55 | 33.11 | 32.81  | 31.77     | 31.47 | 31.30 | 31.52  | 30.48     | 30.47 | 30.71 | 30.55  |

|    |              |       |       |       |       |       |       |       |       |       |       |       |       |
|----|--------------|-------|-------|-------|-------|-------|-------|-------|-------|-------|-------|-------|-------|
| 39 | Me-QRP-00038 | 31.16 | 31.34 | 30.98 | 31.16 | 29.75 | 29.65 | 29.78 | 29.73 | 29.46 | 29.15 | 28.97 | 29.19 |
| 40 | Me-QRP-00039 | 0.00  | 0.00  | 0.00  | 0.00  | 0.00  | 0.00  | 0.00  | 0.00  | 0.00  | 0.00  | 0.00  | 0.00  |
| 41 | Me-QRP-00040 | 34.84 | 34.97 | 37.68 | 35.83 | 34.92 | 34.87 | 35.26 | 35.02 | 36.18 | 36.57 | 37.89 | 36.88 |
| 42 | Me-QRP-00041 | 29.64 | 29.37 | 29.30 | 29.44 | 22.01 | 21.84 | 21.75 | 21.87 | 24.39 | 24.37 | 24.34 | 24.37 |
| 43 | Me-QRP-00042 | 32.07 | 31.78 | 31.94 | 31.93 | 31.82 | 31.88 | 31.49 | 31.73 | 31.30 | 31.39 | 31.34 | 31.34 |
| 44 | Me-QRP-00043 | 27.29 | 27.22 | 27.10 | 27.20 | 25.43 | 26.13 | 25.48 | 25.68 | 25.67 | 25.30 | 25.25 | 25.41 |
| 45 | Me-QRP-00044 | 0.00  | 0.00  | 0.00  | 0.00  | 0.00  | 0.00  | 0.00  | 0.00  | 0.00  | 0.00  | 0.00  | 0.00  |
| 46 | Me-QRP-00045 | 27.76 | 27.54 | 27.54 | 27.62 | 25.89 | 25.71 | 25.58 | 25.73 | 25.35 | 25.21 | 25.12 | 25.23 |
| 47 | Me-QRP-00046 | 30.59 | 30.36 | 30.38 | 30.44 | 30.24 | 30.52 | 30.72 | 30.49 | 28.93 | 28.94 | 29.13 | 29.00 |
| 48 | Me-QRP-00047 | 27.13 | 27.14 | 27.01 | 27.09 | 26.81 | 26.64 | 26.49 | 26.65 | 27.70 | 27.71 | 27.80 | 27.74 |
| 49 | Me-QRP-00048 | 31.31 | 30.95 | 31.31 | 31.19 | 34.78 | 34.91 | 34.25 | 34.65 | 31.07 | 31.61 | 31.00 | 31.23 |
| 50 | Me-QRP-00049 | 31.61 | 30.41 | 31.06 | 31.03 | 29.94 | 29.65 | 29.14 | 29.57 | 23.56 | 24.82 | 24.18 | 24.19 |
| 51 | Me-QRP-00050 | 30.60 | 30.18 | 30.60 | 30.46 | 35.62 | 37.68 | 37.78 | 37.02 | 30.74 | 30.69 | 30.40 | 30.61 |
| 52 | Me-QRP-00051 | 0.00  | 0.00  | 0.00  | 0.00  | 0.00  | 0.00  | 0.00  | 0.00  | 35.12 | 0.00  | 36.42 | 35.77 |
| 53 | Me-QRP-00052 | 28.75 | 28.56 | 28.61 | 28.64 | 27.33 | 27.02 | 27.19 | 27.18 | 27.20 | 27.08 | 27.16 | 27.15 |
| 54 | Me-QRP-00053 | 25.94 | 25.69 | 25.64 | 25.75 | 22.92 | 22.77 | 22.72 | 22.80 | 28.49 | 28.40 | 28.43 | 28.44 |
| 55 | Me-QRP-00054 | 25.40 | 25.36 | 25.41 | 25.39 | 26.48 | 26.37 | 26.44 | 26.43 | 28.02 | 27.82 | 27.87 | 27.90 |
| 56 | Me-QRP-00055 | 25.08 | 25.04 | 24.95 | 25.02 | 26.86 | 26.75 | 26.55 | 26.72 | 29.66 | 29.31 | 29.53 | 29.50 |
| 57 | Me-QRP-00056 | 29.03 | 29.18 | 29.23 | 29.15 | 29.35 | 29.10 | 29.04 | 29.16 | 29.16 | 29.46 | 29.08 | 29.23 |
| 58 | Me-QRP-00053 | 25.94 | 25.69 | 25.64 | 25.75 | 22.92 | 22.77 | 22.72 | 22.80 | 28.49 | 28.40 | 28.43 | 28.44 |
| 59 | Me-QRP-00058 | 23.85 | 23.00 | 23.55 | 23.47 | 26.27 | 25.96 | 25.13 | 25.79 | 25.42 | 25.31 | 25.07 | 25.27 |
| 60 | Me-QRP-00004 | 32.59 | 32.34 | 32.14 | 32.36 | 26.12 | 25.92 | 25.84 | 25.96 | 25.01 | 24.85 | 24.92 | 24.92 |
| 61 | Me-QRP-00060 | 26.22 | 26.08 | 26.14 | 26.15 | 27.24 | 27.00 | 26.93 | 27.05 | 26.31 | 26.43 | 26.35 | 26.36 |
| 62 | Me-QRP-00061 | 23.81 | 23.70 | 23.62 | 23.71 | 24.24 | 23.93 | 23.88 | 24.02 | 26.19 | 26.01 | 25.84 | 26.01 |
| 63 | Me-QRP-00062 | 0.00  | 0.00  | 0.00  | 0.00  | 0.00  | 0.00  | 0.00  | 0.00  | 0.00  | 0.00  | 0.00  | 0.00  |
| 64 | Me-QRP-00063 | 0.00  | 0.00  | 0.00  | 0.00  | 0.00  | 0.00  | 0.00  | 0.00  | 36.16 | 37.01 | 36.05 | 36.41 |
| 65 | Me-QRP-00064 | 30.14 | 30.33 | 30.56 | 30.34 | 27.07 | 27.05 | 27.09 | 27.07 | 27.46 | 27.55 | 27.59 | 27.53 |
| 66 | Me-QRP-00065 | 28.98 | 28.82 | 28.78 | 28.86 | 27.92 | 27.86 | 27.85 | 27.88 | 27.87 | 27.81 | 28.01 | 27.90 |
| 67 | Me-QRP-00066 | 0.00  | 0.00  | 0.00  | 0.00  | 0.00  | 0.00  | 0.00  | 0.00  | 0.00  | 0.00  | 37.60 | 0.00  |
| 68 | Me-QRP-00067 | 0.00  | 0.00  | 0.00  | 0.00  | 0.00  | 0.00  | 0.00  | 0.00  | 37.51 | 38.53 | 0.00  | 0.00  |
| 69 | Me-QRP-00068 | 0.00  | 0.00  | 0.00  | 0.00  | 0.00  | 0.00  | 0.00  | 0.00  | 0.00  | 0.00  | 37.86 | 0.00  |
| 70 | Me-QRP-00008 | 28.07 | 27.93 | 27.93 | 27.97 | 26.51 | 26.32 | 26.11 | 26.32 | 23.70 | 23.46 | 23.57 | 23.58 |
| 71 | Me-QRP-00070 | 0.00  | 0.00  | 0.00  | 0.00  | 0.00  | 0.00  | 0.00  | 0.00  | 0.00  | 0.00  | 0.00  | 0.00  |
| 72 | Me-QRP-00071 | 28.03 | 27.95 | 27.98 | 27.99 | 23.83 | 23.74 | 23.61 | 23.73 | 24.10 | 23.93 | 24.01 | 24.02 |
| 73 | Me-QRP-00072 | 0.00  | 0.00  | 0.00  | 0.00  | 0.00  | 0.00  | 0.00  | 0.00  | 38.12 | 0.00  | 0.00  | 0.00  |
| 74 | Me-QRP-00073 | 28.29 | 27.96 | 28.09 | 28.11 | 26.31 | 26.18 | 26.16 | 26.21 | 27.62 | 27.58 | 27.46 | 27.55 |
| 75 | Me-QRP-00074 | 30.04 | 30.04 | 29.95 | 30.01 | 29.86 | 29.81 | 29.83 | 29.84 | 27.34 | 26.93 | 26.99 | 27.09 |
| 76 | Me-QRP-00075 | 24.75 | 24.55 | 24.58 | 24.63 | 23.21 | 23.14 | 23.16 | 23.17 | 22.71 | 22.67 | 22.57 | 22.65 |
| 77 | Me-QRP-00076 | 28.13 | 28.05 | 27.98 | 28.05 | 25.98 | 25.95 | 26.05 | 25.99 | 27.65 | 27.70 | 27.77 | 27.71 |
| 78 | Me-QRP-00077 | 27.76 | 27.60 | 27.62 | 27.66 | 25.88 | 25.67 | 25.58 | 25.71 | 26.41 | 26.38 | 26.24 | 26.34 |
| 79 | Me-QRP-00078 | 28.65 | 28.51 | 28.70 | 28.62 | 25.90 | 25.83 | 25.65 | 25.79 | 28.95 | 28.45 | 28.54 | 28.65 |
| 80 | Me-QRP-00079 | 28.65 | 28.51 | 28.70 | 28.62 | 25.90 | 25.83 | 25.65 | 25.79 | 28.41 | 28.27 | 28.57 | 28.42 |
| 81 | Me-QRP-00080 | 32.88 | 30.05 | 32.88 | 31.93 | 30.92 | 30.77 | 31.02 | 30.90 | 29.85 | 29.73 | 29.48 | 29.69 |

|     |              |       |       |       |       |       |       |       |       |       |       |       |       |
|-----|--------------|-------|-------|-------|-------|-------|-------|-------|-------|-------|-------|-------|-------|
| 82  | Me-QRP-00081 | 27.77 | 28.28 | 29.43 | 28.49 | 27.31 | 26.73 | 27.36 | 27.14 | 27.31 | 27.48 | 27.43 | 27.41 |
| 83  | Me-QRP-00082 | 28.83 | 28.73 | 28.85 | 28.81 | 26.92 | 26.83 | 27.00 | 26.92 | 27.60 | 27.56 | 27.79 | 27.65 |
| 84  | Me-QRP-00083 | 29.25 | 29.11 | 29.11 | 29.16 | 25.73 | 25.44 | 25.61 | 25.59 | 28.20 | 28.03 | 28.09 | 28.10 |
| 85  | Me-QRP-00084 | 26.02 | 26.00 | 25.98 | 26.00 | 26.52 | 26.38 | 26.42 | 26.44 | 25.64 | 25.70 | 25.53 | 25.63 |
| 86  | Me-QRP-00085 | 26.51 | 26.42 | 26.42 | 26.45 | 25.10 | 25.09 | 25.12 | 25.11 | 24.55 | 24.41 | 24.35 | 24.43 |
| 87  | Me-QRP-00086 | 27.57 | 27.51 | 27.51 | 27.53 | 24.74 | 24.80 | 24.80 | 24.78 | 26.24 | 26.20 | 26.30 | 26.25 |
| 88  | Me-QRP-00075 | 24.75 | 24.55 | 24.58 | 24.63 | 23.21 | 23.14 | 23.16 | 23.17 | 24.98 | 24.87 | 24.99 | 24.95 |
| 89  | Me-QRP-00088 | 27.37 | 27.44 | 27.34 | 27.38 | 24.23 | 24.11 | 24.29 | 24.21 | 25.19 | 24.99 | 25.16 | 25.11 |
| 90  | Me-QRP-00089 | 28.41 | 28.37 | 28.41 | 28.40 | 25.78 | 25.66 | 25.72 | 25.72 | 31.17 | 30.96 | 31.09 | 31.07 |
| 91  | Me-QRP-00090 | 31.14 | 30.97 | 31.01 | 31.04 | 30.03 | 29.98 | 29.82 | 29.94 | 22.71 | 22.67 | 22.57 | 22.65 |
| 92  | Me-QRP-00091 | 25.77 | 25.65 | 25.67 | 25.70 | 27.81 | 27.82 | 27.78 | 27.80 | 27.80 | 27.36 | 27.26 | 27.47 |
| 93  | Me-QRP-00092 | 27.15 | 27.35 | 27.20 | 27.24 | 26.43 | 26.21 | 26.35 | 26.33 | 24.93 | 24.93 | 24.94 | 24.93 |
| 94  | Me-QRP-00093 | 27.51 | 27.40 | 27.33 | 27.41 | 26.23 | 26.11 | 26.15 | 26.16 | 25.30 | 25.22 | 25.20 | 25.24 |
| 95  | Me-QRP-00094 | 28.69 | 28.57 | 28.69 | 28.65 | 27.63 | 27.49 | 27.52 | 27.55 | 25.73 | 25.66 | 25.67 | 25.69 |
| 96  | Me-QRP-00095 | 27.87 | 27.78 | 27.70 | 27.78 | 26.65 | 26.53 | 26.66 | 26.61 | 25.01 | 24.86 | 24.79 | 24.89 |
| 97  | Me-QRP-00096 | 26.60 | 26.54 | 26.53 | 26.56 | 27.09 | 27.18 | 27.19 | 27.15 | 26.01 | 25.99 | 25.89 | 25.96 |
| 98  | Me-QRP-00097 | 0.00  | 0.00  | 0.00  | 0.00  | 0.00  | 0.00  | 0.00  | 0.00  | 0.00  | 0.00  | 0.00  | 0.00  |
| 99  | Me-QRP-00098 | 28.51 | 28.39 | 28.45 | 28.45 | 26.01 | 25.83 | 25.72 | 25.85 | 24.16 | 24.14 | 24.21 | 24.17 |
| 100 | Me-QRP-00099 | 28.95 | 28.95 | 28.82 | 28.91 | 30.17 | 30.05 | 30.30 | 30.17 | 26.73 | 26.59 | 26.73 | 26.68 |
| 101 | Me-QRP-00100 | 0.00  | 0.00  | 0.00  | 0.00  | 0.00  | 0.00  | 0.00  | 0.00  | 34.06 | 32.77 | 33.16 | 33.33 |
| 102 | Me-QRP-00101 | 33.03 | 32.98 | 33.03 | 33.01 | 31.31 | 31.29 | 31.41 | 31.34 | 30.84 | 30.86 | 30.34 | 30.68 |
| 103 | Me-QRP-00102 | 30.27 | 30.13 | 30.04 | 30.15 | 26.91 | 26.86 | 26.77 | 26.85 | 26.62 | 26.71 | 26.55 | 26.62 |
| 104 | Me-QRP-00103 | 30.30 | 30.09 | 30.00 | 30.13 | 28.31 | 28.35 | 28.45 | 28.37 | 28.66 | 28.47 | 28.55 | 28.56 |
| 105 | Me-QRP-00104 | 27.67 | 27.42 | 27.40 | 27.50 | 26.00 | 25.79 | 25.82 | 25.87 | 24.17 | 23.97 | 23.99 | 24.04 |
| 106 | Me-QRP-00105 | 27.82 | 27.68 | 27.70 | 27.74 | 26.43 | 26.46 | 26.54 | 26.48 | 25.08 | 24.89 | 24.95 | 24.97 |
| 107 | Me-QRP-00106 | 29.14 | 29.16 | 29.33 | 29.21 | 27.05 | 27.06 | 27.10 | 27.07 | 28.19 | 28.06 | 28.07 | 28.11 |

**Supplementary Table S5 qPCR cycles of the genes in H124 at formation of root system**

|    | Sample       | H124 leaves |       |       |       | H124 stems |       |       |       | H124 roots |       |       |       |
|----|--------------|-------------|-------|-------|-------|------------|-------|-------|-------|------------|-------|-------|-------|
|    |              | primer ID   | Ct1   | Ct2   | Ct3   | Ave.Ct     | Ct1   | Ct2   | Ct3   | Ave.Ct     | Ct1   | Ct2   | Ct3   |
| 1  | Me-QRP-90001 | 23.13       | 23.01 | 22.92 | 23.02 | 21.07      | 21.00 | 20.92 | 21.00 | 22.65      | 22.56 | 22.35 | 22.52 |
| 2  | Me-QRP-00001 | 24.70       | 24.72 | 24.43 | 24.62 | 22.79      | 22.12 | 22.10 | 22.34 | 24.47      | 24.33 | 24.17 | 24.32 |
| 3  | Me-QRP-00002 | 26.63       | 26.39 | 26.30 | 26.44 | 22.51      | 22.31 | 22.27 | 22.37 | 24.13      | 24.01 | 23.92 | 24.02 |
| 4  | Me-QRP-00003 | 0.00        | 0.00  | 0.00  | 0.00  | 0.00       | 0.00  | 0.00  | 0.00  | 0.00       | 0.00  | 0.00  | 0.00  |
| 5  | Me-QRP-00004 | 28.44       | 28.24 | 28.08 | 28.25 | 23.69      | 23.73 | 23.38 | 23.60 | 24.44      | 24.36 | 24.25 | 24.35 |
| 6  | Me-QRP-00005 | 24.49       | 24.30 | 24.12 | 24.30 | 23.84      | 23.55 | 23.56 | 23.65 | 23.41      | 23.26 | 22.99 | 23.22 |
| 7  | Me-QRP-00006 | 27.04       | 26.90 | 26.86 | 26.93 | 25.50      | 25.58 | 25.13 | 25.40 | 26.79      | 26.37 | 26.23 | 26.46 |
| 8  | Me-QRP-00007 | 28.25       | 28.16 | 28.05 | 28.16 | 26.75      | 26.63 | 26.56 | 26.65 | 26.85      | 26.82 | 26.78 | 26.81 |
| 9  | Me-QRP-00008 | 26.90       | 26.95 | 26.81 | 26.89 | 25.36      | 25.23 | 25.08 | 25.22 | 26.88      | 26.45 | 26.31 | 26.54 |
| 10 | Me-QRP-00009 | 26.96       | 26.92 | 26.89 | 26.93 | 26.76      | 26.78 | 26.85 | 26.80 | 29.85      | 29.99 | 29.91 | 29.92 |
| 11 | Me-QRP-00010 | 31.59       | 31.50 | 31.30 | 31.46 | 31.75      | 31.40 | 31.33 | 31.49 | 30.81      | 30.71 | 30.53 | 30.68 |
| 12 | Me-QRP-00011 | 25.87       | 25.91 | 25.91 | 25.90 | 25.43      | 25.43 | 25.18 | 25.35 | 24.16      | 24.17 | 24.11 | 24.15 |
| 13 | Me-QRP-00012 | 23.22       | 23.35 | 23.25 | 23.27 | 25.33      | 25.26 | 24.92 | 25.17 | 27.61      | 27.55 | 27.27 | 27.48 |
| 14 | Me-QRP-00013 | 28.92       | 28.46 | 28.77 | 28.72 | 25.81      | 25.70 | 25.67 | 25.73 | 23.84      | 23.80 | 23.66 | 23.77 |
| 15 | Me-QRP-00014 | 24.91       | 24.79 | 24.92 | 24.87 | 22.56      | 22.73 | 22.45 | 22.58 | 22.64      | 22.50 | 22.35 | 22.50 |
| 16 | Me-QRP-00015 | 24.59       | 24.42 | 24.47 | 24.49 | 22.31      | 22.14 | 22.16 | 22.21 | 23.78      | 23.71 | 23.60 | 23.70 |
| 17 | Me-QRP-00016 | 26.72       | 26.73 | 26.70 | 26.72 | 24.42      | 24.10 | 24.08 | 24.20 | 24.00      | 24.05 | 23.99 | 24.01 |
| 18 | Me-QRP-00017 | 23.22       | 23.03 | 22.91 | 23.06 | 21.57      | 21.45 | 21.07 | 21.36 | 22.73      | 22.47 | 22.25 | 22.48 |
| 19 | Me-QRP-00018 | 26.56       | 26.46 | 26.22 | 26.41 | 24.21      | 23.89 | 23.74 | 23.94 | 23.25      | 23.29 | 23.29 | 23.28 |
| 20 | Me-QRP-00019 | 29.51       | 29.25 | 29.21 | 29.32 | 27.52      | 27.24 | 27.07 | 27.28 | 25.99      | 25.97 | 25.85 | 25.94 |
| 21 | Me-QRP-00020 | 26.87       | 26.87 | 26.87 | 26.87 | 26.12      | 25.83 | 25.73 | 25.89 | 26.90      | 26.88 | 26.85 | 26.88 |
| 22 | Me-QRP-00021 | 29.74       | 29.91 | 29.51 | 29.72 | 31.20      | 30.67 | 30.85 | 30.91 | 29.14      | 29.12 | 28.93 | 29.06 |
| 23 | Me-QRP-00022 | 23.09       | 23.18 | 23.09 | 23.12 | 25.60      | 25.32 | 25.10 | 25.34 | 23.02      | 22.97 | 22.83 | 22.94 |
| 24 | Me-QRP-00023 | 26.84       | 26.75 | 26.72 | 26.77 | 25.88      | 25.69 | 25.52 | 25.70 | 26.36      | 26.64 | 26.20 | 26.40 |
| 25 | Me-QRP-00024 | 26.96       | 26.94 | 26.92 | 26.94 | 25.31      | 25.15 | 25.07 | 25.18 | 26.10      | 26.09 | 25.97 | 26.05 |
| 26 | Me-QRP-00025 | 35.72       | 35.09 | 34.40 | 35.07 | 32.28      | 32.29 | 32.21 | 32.26 | 33.32      | 33.04 | 32.45 | 32.94 |
| 27 | Me-QRP-00026 | 28.05       | 27.92 | 28.19 | 28.05 | 26.62      | 26.69 | 26.35 | 26.55 | 27.06      | 26.78 | 26.59 | 26.81 |
| 28 | Me-QRP-00027 | 25.71       | 25.63 | 25.74 | 25.69 | 24.09      | 24.20 | 23.99 | 24.09 | 25.75      | 25.62 | 25.54 | 25.64 |
| 29 | Me-QRP-00028 | 32.82       | 33.01 | 32.52 | 32.78 | 34.82      | 34.13 | 34.03 | 34.33 | 34.96      | 35.24 | 35.04 | 35.08 |
| 30 | Me-QRP-00029 | 0.00        | 0.00  | 0.00  | 0.00  | 0.00       | 0.00  | 0.00  | 0.00  | 0.00       | 0.00  | 0.00  | 0.00  |
| 31 | Me-QRP-00030 | 28.55       | 28.50 | 28.44 | 28.50 | 29.86      | 29.76 | 29.54 | 29.72 | 29.08      | 29.14 | 28.98 | 29.06 |
| 32 | Me-QRP-00031 | 29.02       | 28.85 | 28.89 | 28.92 | 27.71      | 27.53 | 27.40 | 27.54 | 29.49      | 29.47 | 29.26 | 29.41 |
| 33 | Me-QRP-00032 | 27.44       | 27.34 | 27.28 | 27.35 | 25.94      | 25.83 | 25.72 | 25.83 | 25.40      | 25.49 | 25.39 | 25.43 |
| 34 | Me-QRP-00033 | 27.74       | 27.88 | 27.72 | 27.78 | 24.59      | 24.59 | 24.31 | 24.50 | 24.46      | 24.43 | 24.33 | 24.41 |
| 35 | Me-QRP-00034 | 32.71       | 32.18 | 32.20 | 32.36 | 32.37      | 32.03 | 31.79 | 32.06 | 31.43      | 31.24 | 31.04 | 31.24 |
| 36 | Me-QRP-00035 | 0.00        | 0.00  | 0.00  | 0.00  | 0.00       | 0.00  | 0.00  | 0.00  | 0.00       | 0.00  | 0.00  | 0.00  |
| 37 | Me-QRP-00036 | 0.00        | 0.00  | 0.00  | 0.00  | 0.00       | 0.00  | 0.00  | 0.00  | 0.00       | 0.00  | 0.00  | 0.00  |
| 38 | Me-QRP-00037 | 31.39       | 31.67 | 31.10 | 31.38 | 32.76      | 32.49 | 32.77 | 32.67 | 31.10      | 31.06 | 30.86 | 31.01 |
| 39 | Me-QRP-00038 | 29.18       | 29.08 | 29.20 | 29.16 | 28.74      | 28.32 | 28.25 | 28.44 | 29.56      | 29.60 | 29.52 | 29.56 |

|    |              |       |       |       |       |       |       |       |       |       |       |       |       |
|----|--------------|-------|-------|-------|-------|-------|-------|-------|-------|-------|-------|-------|-------|
| 40 | Me-QRP-00039 | 0.00  | 0.00  | 0.00  | 0.00  | 0.00  | 0.00  | 0.00  | 0.00  | 0.00  | 0.00  | 0.00  | 0.00  |
| 41 | Me-QRP-00040 | 36.58 | 34.95 | 36.20 | 35.91 | 34.57 | 34.87 | 34.36 | 34.60 | 35.69 | 36.08 | 35.50 | 35.75 |
| 42 | Me-QRP-00041 | 26.85 | 26.87 | 26.74 | 26.82 | 24.26 | 24.43 | 24.10 | 24.26 | 23.92 | 23.78 | 23.66 | 23.79 |
| 43 | Me-QRP-00042 | 31.72 | 31.86 | 31.44 | 31.67 | 31.20 | 31.23 | 31.18 | 31.20 | 31.49 | 31.23 | 31.14 | 31.29 |
| 44 | Me-QRP-00043 | 26.29 | 26.18 | 26.29 | 26.25 | 24.00 | 23.88 | 23.85 | 23.91 | 25.02 | 24.94 | 24.84 | 24.94 |
| 45 | Me-QRP-00044 | 0.00  | 0.00  | 0.00  | 0.00  | 0.00  | 0.00  | 0.00  | 0.00  | 0.00  | 0.00  | 0.00  | 0.00  |
| 46 | Me-QRP-00045 | 26.75 | 26.63 | 26.40 | 26.59 | 26.20 | 26.12 | 25.98 | 26.10 | 26.53 | 26.36 | 26.26 | 26.39 |
| 47 | Me-QRP-00046 | 29.34 | 29.18 | 28.97 | 29.16 | 31.52 | 31.78 | 31.99 | 31.76 | 31.21 | 30.91 | 30.96 | 31.03 |
| 48 | Me-QRP-00047 | 27.33 | 27.23 | 27.07 | 27.21 | 28.12 | 28.00 | 27.90 | 28.01 | 26.95 | 26.87 | 26.73 | 26.85 |
| 49 | Me-QRP-00048 | 30.40 | 30.36 | 30.34 | 30.37 | 37.74 | 36.12 | N/A   | 36.93 | 35.43 | 36.56 | 35.57 | 35.86 |
| 50 | Me-QRP-00049 | 30.43 | 30.17 | 30.35 | 30.32 | 28.24 | 28.26 | 27.79 | 28.10 | 29.13 | 28.92 | 28.77 | 28.94 |
| 51 | Me-QRP-00050 | 29.13 | 29.13 | 29.06 | 29.11 | 31.37 | 31.36 | 31.38 | 31.37 | 31.24 | 31.48 | 31.24 | 31.32 |
| 52 | Me-QRP-00051 | 0.00  | 0.00  | 0.00  | 0.00  | 0.00  | 0.00  | 0.00  | 0.00  | 0.00  | 0.00  | 0.00  | 0.00  |
| 53 | Me-QRP-00052 | 27.91 | 27.69 | 27.67 | 27.76 | 26.05 | 25.93 | 25.89 | 25.96 | 26.49 | 26.24 | 26.11 | 26.28 |
| 54 | Me-QRP-00053 | 25.42 | 25.27 | 25.17 | 25.29 | 23.05 | 22.98 | 22.87 | 22.97 | 23.92 | 23.95 | 23.79 | 23.89 |
| 55 | Me-QRP-00054 | 25.20 | 25.04 | 25.21 | 25.15 | 26.34 | 26.51 | 26.23 | 26.36 | 27.51 | 27.24 | 27.00 | 27.25 |
| 56 | Me-QRP-00055 | 25.23 | 24.98 | 24.81 | 25.01 | 26.39 | 26.28 | 26.15 | 26.28 | 27.67 | 27.35 | 27.21 | 27.41 |
| 57 | Me-QRP-00056 | 28.24 | 28.41 | 28.15 | 28.27 | 27.94 | 27.95 | 27.92 | 27.93 | 28.60 | 28.35 | 28.32 | 28.43 |
| 58 | Me-QRP-00053 | 25.42 | 25.27 | 25.17 | 25.29 | 23.05 | 22.98 | 22.87 | 22.97 | 23.92 | 23.95 | 23.79 | 23.89 |
| 59 | Me-QRP-00058 | 22.19 | 22.23 | 21.84 | 22.09 | 24.11 | 23.78 | 23.27 | 23.72 | 20.49 | 20.60 | 19.80 | 20.30 |
| 60 | Me-QRP-00004 | 28.44 | 28.24 | 28.08 | 28.25 | 23.69 | 23.73 | 23.38 | 23.60 | 24.44 | 24.36 | 24.25 | 24.35 |
| 61 | Me-QRP-00060 | 27.14 | 26.97 | 26.81 | 26.98 | 26.81 | 26.60 | 26.42 | 26.61 | 27.04 | 26.88 | 26.80 | 26.91 |
| 62 | Me-QRP-00061 | 22.39 | 22.24 | 22.14 | 22.26 | 22.39 | 22.36 | 22.11 | 22.29 | 25.35 | 25.12 | 24.88 | 25.12 |
| 63 | Me-QRP-00062 | 0.00  | 0.00  | 0.00  | 0.00  | 0.00  | 0.00  | 0.00  | 0.00  | 0.00  | 0.00  | 0.00  | 0.00  |
| 64 | Me-QRP-00063 | 0.00  | 0.00  | 0.00  | 0.00  | 0.00  | 0.00  | 0.00  | 0.00  | 0.00  | 0.00  | 0.00  | 0.00  |
| 65 | Me-QRP-00064 | 28.82 | 28.54 | 28.83 | 28.73 | 30.58 | 30.74 | 30.46 | 30.59 | 28.94 | 28.95 | 28.79 | 28.89 |
| 66 | Me-QRP-00065 | 28.93 | 28.59 | 28.90 | 28.81 | 29.20 | 29.19 | 29.06 | 29.15 | 27.49 | 27.27 | 27.05 | 27.27 |
| 67 | Me-QRP-00066 | 0.00  | 0.00  | 0.00  | 0.00  | 0.00  | 0.00  | 0.00  | 0.00  | 0.00  | 0.00  | 0.00  | 0.00  |
| 68 | Me-QRP-00067 | 0.00  | 0.00  | 0.00  | 0.00  | 0.00  | 0.00  | 0.00  | 0.00  | 0.00  | 0.00  | 0.00  | 0.00  |
| 69 | Me-QRP-00068 | 0.00  | 0.00  | 0.00  | 0.00  | 0.00  | 0.00  | 0.00  | 0.00  | 0.00  | 0.00  | 0.00  | 0.00  |
| 70 | Me-QRP-00008 | 26.90 | 26.95 | 26.81 | 26.89 | 25.36 | 25.23 | 25.08 | 25.22 | 26.88 | 26.45 | 26.31 | 26.54 |
| 71 | Me-QRP-00070 | 0.00  | 0.00  | 0.00  | 0.00  | 0.00  | 0.00  | 0.00  | 0.00  | 0.00  | 0.00  | 0.00  | 0.00  |
| 72 | Me-QRP-00071 | 25.46 | 25.34 | 25.31 | 25.37 | 22.15 | 22.08 | 21.95 | 22.06 | 23.79 | 23.60 | 23.49 | 23.63 |
| 73 | Me-QRP-00072 | 0.00  | 0.00  | 0.00  | 0.00  | 0.00  | 0.00  | 0.00  | 0.00  | 0.00  | 0.00  | 0.00  | 0.00  |
| 74 | Me-QRP-00073 | 26.24 | 26.06 | 26.18 | 26.16 | 24.72 | 24.92 | 24.33 | 24.66 | 25.64 | 25.37 | 25.20 | 25.40 |
| 75 | Me-QRP-00074 | 28.42 | 28.10 | 28.35 | 28.29 | 27.66 | 27.48 | 27.43 | 27.52 | 29.66 | 29.47 | 29.40 | 29.51 |
| 76 | Me-QRP-00075 | 24.80 | 24.62 | 24.75 | 24.72 | 24.27 | 24.08 | 24.10 | 24.15 | 23.33 | 23.22 | 23.09 | 23.22 |
| 77 | Me-QRP-00076 | 26.49 | 26.41 | 26.45 | 26.45 | 26.08 | 26.05 | 26.01 | 26.05 | 26.37 | 26.33 | 26.25 | 26.32 |
| 78 | Me-QRP-00077 | 25.93 | 25.88 | 25.77 | 25.86 | 23.89 | 23.89 | 23.81 | 23.86 | 25.98 | 25.86 | 25.71 | 25.85 |
| 79 | Me-QRP-00078 | 27.61 | 27.52 | 27.26 | 27.46 | 25.31 | 25.33 | 25.23 | 25.29 | 25.66 | 25.52 | 25.43 | 25.54 |
| 80 | Me-QRP-00079 | 27.61 | 27.52 | 27.26 | 27.46 | 25.31 | 25.33 | 25.23 | 25.29 | 25.66 | 25.52 | 25.43 | 25.54 |
| 81 | Me-QRP-00080 | 31.67 | 31.86 | 31.78 | 31.77 | 28.47 | 28.80 | 28.43 | 28.57 | 30.49 | 30.33 | 30.62 | 30.48 |
| 82 | Me-QRP-00081 | 28.43 | 28.58 | 28.60 | 28.54 | 27.21 | 27.26 | 26.86 | 27.11 | 28.51 | 27.91 | 27.74 | 28.05 |

|     |              |       |       |       |       |       |       |       |       |       |       |       |       |
|-----|--------------|-------|-------|-------|-------|-------|-------|-------|-------|-------|-------|-------|-------|
| 83  | Me-QRP-00082 | 27.33 | 27.29 | 27.27 | 27.30 | 27.23 | 27.21 | 27.14 | 27.19 | 27.01 | 26.96 | 26.81 | 26.93 |
| 84  | Me-QRP-00083 | 27.21 | 27.12 | 27.28 | 27.20 | 24.16 | 24.32 | 24.14 | 24.21 | 25.30 | 25.08 | 24.91 | 25.10 |
| 85  | Me-QRP-00084 | 25.56 | 25.42 | 25.54 | 25.51 | 24.90 | 25.19 | 24.92 | 25.00 | 27.07 | 26.89 | 26.85 | 26.94 |
| 86  | Me-QRP-00085 | 25.42 | 25.38 | 25.48 | 25.43 | 24.44 | 24.75 | 24.45 | 24.55 | 25.21 | 25.10 | 24.89 | 25.07 |
| 87  | Me-QRP-00086 | 25.84 | 25.73 | 25.77 | 25.78 | 23.16 | 22.96 | 22.96 | 23.03 | 23.68 | 23.51 | 23.35 | 23.51 |
| 88  | Me-QRP-00075 | 24.80 | 24.62 | 24.75 | 24.72 | 24.27 | 24.08 | 24.10 | 24.15 | 23.33 | 23.22 | 23.09 | 23.22 |
| 89  | Me-QRP-00088 | 25.72 | 25.55 | 25.70 | 25.66 | 24.73 | 24.86 | 24.71 | 24.77 | 23.53 | 23.37 | 23.09 | 23.33 |
| 90  | Me-QRP-00089 | 26.83 | 26.80 | 26.90 | 26.84 | 24.37 | 24.68 | 24.45 | 24.50 | 28.76 | 28.78 | 28.62 | 28.72 |
| 91  | Me-QRP-00090 | 29.69 | 29.63 | 29.76 | 29.69 | 28.70 | 28.72 | 28.62 | 28.68 | 29.49 | 29.94 | 29.52 | 29.65 |
| 92  | Me-QRP-00091 | 25.94 | 25.72 | 25.80 | 25.82 | 28.44 | 28.34 | 28.23 | 28.34 | 25.29 | 25.21 | 25.07 | 25.19 |
| 93  | Me-QRP-00092 | 25.80 | 25.72 | 25.82 | 25.78 | 24.63 | 24.80 | 24.50 | 24.64 | 26.65 | 26.36 | 26.09 | 26.37 |
| 94  | Me-QRP-00093 | 26.04 | 25.93 | 26.09 | 26.02 | 24.81 | 25.18 | 24.82 | 24.93 | 26.12 | 26.04 | 25.90 | 26.02 |
| 95  | Me-QRP-00094 | 28.26 | 28.05 | 28.16 | 28.16 | 26.00 | 26.22 | 25.95 | 26.06 | 27.81 | 27.63 | 27.35 | 27.60 |
| 96  | Me-QRP-00095 | 26.58 | 26.29 | 26.46 | 26.45 | 25.58 | 25.45 | 25.34 | 25.45 | 27.12 | 26.96 | 26.87 | 26.98 |
| 97  | Me-QRP-00096 | 25.57 | 25.37 | 25.41 | 25.45 | 26.01 | 25.93 | 25.80 | 25.91 | 27.12 | 27.01 | 26.97 | 27.04 |
| 98  | Me-QRP-00097 | 0.00  | 0.00  | 0.00  | 0.00  | 0.00  | 0.00  | 0.00  | 0.00  | 0.00  | 0.00  | 0.00  | 0.00  |
| 99  | Me-QRP-00098 | 26.47 | 26.33 | 26.34 | 26.38 | 24.75 | 24.59 | 24.61 | 24.65 | 24.91 | 24.74 | 24.64 | 24.76 |
| 100 | Me-QRP-00099 | 27.37 | 27.49 | 27.36 | 27.41 | 28.04 | 27.95 | 27.83 | 27.94 | 25.79 | 25.59 | 25.60 | 25.66 |
| 101 | Me-QRP-00100 | 0.00  | 0.00  | 0.00  | 0.00  | 0.00  | 0.00  | 0.00  | 0.00  | 0.00  | 0.00  | 0.00  | 0.00  |
| 102 | Me-QRP-00101 | 33.29 | 33.26 | 33.71 | 33.42 | 32.36 | 32.82 | 32.40 | 32.53 | 32.97 | 32.77 | 32.39 | 32.71 |
| 103 | Me-QRP-00102 | 28.66 | 28.43 | 28.45 | 28.52 | 25.24 | 25.44 | 25.20 | 25.29 | 26.40 | 26.32 | 26.81 | 26.51 |
| 104 | Me-QRP-00103 | 28.85 | 28.75 | 28.82 | 28.81 | 27.93 | 27.75 | 27.67 | 27.78 | 27.90 | 27.88 | 27.45 | 27.74 |
| 105 | Me-QRP-00104 | 24.37 | 24.12 | 24.21 | 24.23 | 24.29 | 24.32 | 24.01 | 24.20 | 26.39 | 25.88 | 25.71 | 26.00 |
| 106 | Me-QRP-00105 | 26.50 | 26.35 | 26.33 | 26.39 | 25.14 | 25.01 | 24.98 | 25.05 | 26.75 | 26.83 | 26.60 | 26.73 |
| 107 | Me-QRP-00106 | 27.85 | 27.75 | 27.86 | 27.82 | 27.25 | 27.33 | 27.16 | 27.25 | 26.68 | 26.56 | 26.36 | 26.53 |

**Supplementary Table S6 qPCR cycles of the genes in F01 at formation of root system**

|    | Sample       | F01 leaves |       |       |        | F01 stems |       |       |        | F01 roots |       |       |        |
|----|--------------|------------|-------|-------|--------|-----------|-------|-------|--------|-----------|-------|-------|--------|
|    | primer ID    | Ct1        | Ct2   | Ct3   | Ave.Ct | Ct1       | Ct2   | Ct3   | Ave.Ct | Ct1       | Ct2   | Ct3   | Ave.Ct |
| 1  | Me-QRP-90001 | 22.97      | 22.70 | 22.71 | 22.79  | 22.47     | 22.45 | 22.22 | 22.38  | 21.86     | 21.73 | 21.78 | 21.79  |
| 2  | Me-QRP-00001 | 24.71      | 24.37 | 24.46 | 24.51  | 23.73     | 23.38 | 23.31 | 23.47  | 23.19     | 23.16 | 23.18 | 23.18  |
| 3  | Me-QRP-00002 | 25.84      | 25.49 | 25.38 | 25.57  | 22.96     | 22.90 | 22.90 | 22.92  | 22.90     | 22.81 | 22.85 | 22.85  |
| 4  | Me-QRP-00003 | 0.00       | 0.00  | 0.00  | 0.00   | 0.00      | 0.00  | 0.00  | 0.00   | 0.00      | 0.00  | 0.00  | 0.00   |
| 5  | Me-QRP-00004 | 27.17      | 26.81 | 26.78 | 26.92  | 25.07     | 24.97 | 25.01 | 25.01  | 23.47     | 23.38 | 23.49 | 23.45  |
| 6  | Me-QRP-00005 | 25.08      | 24.61 | 24.48 | 24.73  | 23.98     | 23.79 | 23.66 | 23.81  | 23.98     | 23.75 | 23.92 | 23.88  |
| 7  | Me-QRP-00006 | 27.38      | 27.12 | 27.05 | 27.19  | 26.58     | 26.09 | 26.12 | 26.26  | 25.96     | 25.97 | 25.89 | 25.94  |
| 8  | Me-QRP-00007 | 27.86      | 27.47 | 27.53 | 27.62  | 25.92     | 25.95 | 25.82 | 25.89  | 26.86     | 26.87 | 26.70 | 26.81  |
| 9  | Me-QRP-00008 | 27.07      | 26.80 | 26.79 | 26.89  | 25.74     | 25.65 | 25.53 | 25.64  | 25.77     | 25.72 | 25.77 | 25.75  |
| 10 | Me-QRP-00009 | 27.07      | 27.33 | 27.26 | 27.22  | 27.94     | 28.13 | 28.25 | 28.10  | 28.01     | 27.78 | 27.66 | 27.82  |
| 11 | Me-QRP-00010 | 31.62      | 30.80 | 30.86 | 31.09  | 30.62     | 30.75 | 30.66 | 30.68  | 30.24     | 30.27 | 30.32 | 30.28  |
| 12 | Me-QRP-00011 | 26.10      | 25.95 | 25.87 | 25.97  | 25.42     | 25.31 | 25.35 | 25.36  | 23.79     | 23.78 | 23.81 | 23.79  |
| 13 | Me-QRP-00012 | 23.84      | 23.58 | 23.47 | 23.63  | 25.12     | 25.08 | 25.29 | 25.17  | 27.19     | 26.92 | 27.09 | 27.07  |
| 14 | Me-QRP-00013 | 28.94      | 28.65 | 28.34 | 28.64  | 24.43     | 24.34 | 24.37 | 24.38  | 25.21     | 24.83 | 24.86 | 24.97  |
| 15 | Me-QRP-00014 | 24.73      | 24.74 | 24.61 | 24.69  | 22.92     | 22.94 | 22.86 | 22.91  | 23.00     | 23.04 | 23.12 | 23.05  |
| 16 | Me-QRP-00015 | 24.90      | 24.55 | 24.44 | 24.63  | 23.54     | 23.53 | 23.39 | 23.49  | 24.03     | 23.89 | 23.90 | 23.94  |
| 17 | Me-QRP-00016 | 26.47      | 26.10 | 26.20 | 26.26  | 23.33     | 23.17 | 23.21 | 23.23  | 24.71     | 24.62 | 24.59 | 24.64  |
| 18 | Me-QRP-00017 | 23.61      | 23.00 | 23.43 | 23.35  | 22.74     | 22.52 | 22.72 | 22.66  | 22.80     | 22.70 | 22.77 | 22.76  |
| 19 | Me-QRP-00018 | 26.24      | 25.78 | 25.78 | 25.93  | 23.44     | 23.27 | 23.30 | 23.34  | 23.74     | 23.70 | 23.66 | 23.70  |
| 20 | Me-QRP-00019 | 28.89      | 28.58 | 28.71 | 28.72  | 29.48     | 29.27 | 29.25 | 29.33  | 27.61     | 27.58 | 27.40 | 27.53  |
| 21 | Me-QRP-00020 | 26.85      | 26.69 | 26.53 | 26.69  | 26.22     | 26.00 | 26.08 | 26.10  | 26.52     | 26.51 | 26.58 | 26.54  |
| 22 | Me-QRP-00021 | 30.73      | 30.25 | 30.55 | 30.51  | 31.00     | 30.55 | 30.81 | 30.79  | 30.15     | 30.16 | 30.18 | 30.17  |
| 23 | Me-QRP-00022 | 23.70      | 23.29 | 23.44 | 23.48  | 24.60     | 24.45 | 24.58 | 24.54  | 23.85     | 23.85 | 23.87 | 23.86  |
| 24 | Me-QRP-00023 | 26.83      | 26.49 | 26.48 | 26.60  | 25.31     | 25.11 | 25.19 | 25.20  | 25.76     | 25.80 | 25.73 | 25.76  |
| 25 | Me-QRP-00024 | 26.51      | 26.08 | 26.13 | 26.24  | 25.39     | 25.22 | 25.17 | 25.26  | 25.74     | 25.65 | 25.54 | 25.64  |
| 26 | Me-QRP-00025 | 34.71      | 34.68 | 34.30 | 34.56  | 34.22     | 34.14 | 34.29 | 34.22  | 32.05     | 32.39 | 32.49 | 32.31  |
| 27 | Me-QRP-00026 | 28.53      | 28.48 | 28.35 | 28.45  | 26.99     | 26.93 | 26.69 | 26.87  | 26.91     | 26.93 | 26.98 | 26.94  |
| 28 | Me-QRP-00027 | 25.47      | 25.34 | 25.37 | 25.39  | 25.67     | 25.82 | 25.73 | 25.74  | 26.02     | 25.93 | 26.13 | 26.03  |
| 29 | Me-QRP-00028 | 32.41      | 32.12 | 32.17 | 32.24  | 33.36     | 33.60 | 33.27 | 33.41  | 34.58     | 34.20 | 34.93 | 34.57  |
| 30 | Me-QRP-00029 | 0.00       | 0.00  | 0.00  | 0.00   | 0.00      | 0.00  | 0.00  | 0.00   | 0.00      | 0.00  | 0.00  | 0.00   |
| 31 | Me-QRP-00030 | 29.01      | 28.80 | 28.81 | 28.87  | 29.24     | 29.05 | 29.15 | 29.15  | 29.42     | 29.63 | 29.42 | 29.49  |
| 32 | Me-QRP-00031 | 29.54      | 29.28 | 29.12 | 29.31  | 27.98     | 27.99 | 27.98 | 27.98  | 28.89     | 28.80 | 28.85 | 28.85  |
| 33 | Me-QRP-00032 | 27.14      | 26.79 | 26.77 | 26.90  | 25.52     | 25.38 | 25.42 | 25.44  | 25.36     | 25.28 | 25.18 | 25.27  |
| 34 | Me-QRP-00033 | 27.20      | 26.95 | 27.05 | 27.07  | 24.88     | 24.68 | 25.00 | 24.85  | 25.57     | 25.47 | 25.62 | 25.56  |
| 35 | Me-QRP-00034 | 32.96      | 32.60 | 32.65 | 32.74  | 32.08     | 31.59 | 31.76 | 31.81  | 30.87     | 30.90 | 30.60 | 30.79  |
| 36 | Me-QRP-00035 | 0.00       | 0.00  | 0.00  | 0.00   | 0.00      | 0.00  | 0.00  | 0.00   | 0.00      | 0.00  | 0.00  | 0.00   |
| 37 | Me-QRP-00036 | 0.00       | 0.00  | 0.00  | 0.00   | 0.00      | 0.00  | 0.00  | 0.00   | 0.00      | 0.00  | 0.00  | 0.00   |
| 38 | Me-QRP-00037 | 32.16      | 31.48 | 31.68 | 31.77  | 30.72     | 30.60 | 30.55 | 30.62  | 31.14     | 31.15 | 31.31 | 31.20  |
| 39 | Me-QRP-00038 | 29.90      | 29.66 | 29.71 | 29.75  | 27.64     | 27.60 | 27.60 | 27.61  | 28.96     | 28.90 | 28.98 | 28.95  |

|    |              |       |       |       |       |       |       |       |       |       |       |       |       |
|----|--------------|-------|-------|-------|-------|-------|-------|-------|-------|-------|-------|-------|-------|
| 40 | Me-QRP-00039 | 0.00  | 0.00  | 0.00  | 0.00  | 0.00  | 0.00  | 0.00  | 0.00  | 0.00  | 0.00  | 0.00  | 0.00  |
| 41 | Me-QRP-00040 | 34.56 | 34.65 | 35.47 | 34.89 | 35.54 | 35.76 | 33.46 | 34.92 | 35.81 | 36.81 | 35.83 | 36.15 |
| 42 | Me-QRP-00041 | 26.96 | 26.60 | 26.66 | 26.74 | 25.09 | 24.85 | 24.90 | 24.95 | 22.85 | 22.78 | 22.79 | 22.81 |
| 43 | Me-QRP-00042 | 31.79 | 31.44 | 31.26 | 31.50 | 30.59 | 30.52 | 30.59 | 30.57 | 31.48 | 31.59 | 31.41 | 31.49 |
| 44 | Me-QRP-00043 | 26.10 | 25.70 | 25.57 | 25.79 | 23.89 | 23.79 | 23.90 | 23.86 | 24.74 | 24.67 | 24.70 | 24.70 |
| 45 | Me-QRP-00044 | 0.00  | 0.00  | 0.00  | 0.00  | 0.00  | 0.00  | 0.00  | 0.00  | 0.00  | 0.00  | 0.00  | 0.00  |
| 46 | Me-QRP-00045 | 27.05 | 26.62 | 26.66 | 26.78 | 25.54 | 25.39 | 25.39 | 25.44 | 26.78 | 26.78 | 26.61 | 26.72 |
| 47 | Me-QRP-00046 | 30.30 | 29.83 | 29.72 | 29.95 | 30.21 | 30.12 | 29.88 | 30.07 | 32.10 | 31.86 | 31.68 | 31.88 |
| 48 | Me-QRP-00047 | 27.12 | 26.93 | 26.66 | 26.90 | 25.30 | 25.13 | 25.22 | 25.22 | 27.69 | 27.72 | 27.60 | 27.67 |
| 49 | Me-QRP-00048 | 31.28 | 30.58 | 30.44 | 30.77 | 32.53 | 32.52 | 32.78 | 32.61 | 34.37 | 34.84 | 34.09 | 34.43 |
| 50 | Me-QRP-00049 | 30.19 | 29.41 | 29.75 | 29.78 | 29.59 | 28.90 | 29.34 | 29.28 | 27.94 | 28.26 | 28.14 | 28.12 |
| 51 | Me-QRP-00050 | 30.71 | 30.45 | 30.31 | 30.49 | 33.03 | 33.17 | 32.88 | 33.03 | 30.76 | 31.00 | 30.78 | 30.85 |
| 52 | Me-QRP-00051 | 0.00  | 0.00  | 0.00  | 0.00  | 0.00  | 0.00  | 0.00  | 0.00  | 0.00  | 0.00  | 0.00  | 0.00  |
| 53 | Me-QRP-00052 | 28.18 | 27.78 | 27.69 | 27.88 | 26.58 | 26.34 | 26.30 | 26.41 | 25.71 | 25.65 | 25.58 | 25.65 |
| 54 | Me-QRP-00053 | 25.03 | 24.86 | 24.72 | 24.87 | 22.76 | 22.49 | 22.54 | 22.60 | 24.12 | 24.02 | 24.15 | 24.10 |
| 55 | Me-QRP-00054 | 25.19 | 25.08 | 25.11 | 25.12 | 25.69 | 25.78 | 25.80 | 25.76 | 26.69 | 26.57 | 26.75 | 26.67 |
| 56 | Me-QRP-00055 | 25.06 | 24.59 | 24.81 | 24.82 | 26.03 | 25.76 | 25.94 | 25.91 | 26.67 | 26.76 | 26.73 | 26.72 |
| 57 | Me-QRP-00056 | 28.84 | 28.43 | 28.55 | 28.61 | 28.15 | 28.01 | 28.03 | 28.06 | 27.86 | 27.75 | 27.71 | 27.77 |
| 58 | Me-QRP-00053 | 25.03 | 24.86 | 24.72 | 24.87 | 22.76 | 22.49 | 22.54 | 22.60 | 24.12 | 24.02 | 24.15 | 24.10 |
| 59 | Me-QRP-00058 | 21.26 | 21.13 | 21.17 | 21.19 | 24.52 | 23.57 | 24.08 | 24.05 | 22.71 | 22.54 | 23.00 | 22.75 |
| 60 | Me-QRP-00004 | 27.17 | 26.81 | 26.78 | 26.92 | 25.07 | 24.97 | 25.01 | 25.01 | 23.47 | 23.38 | 23.49 | 23.45 |
| 61 | Me-QRP-00060 | 26.50 | 26.11 | 26.13 | 26.25 | 25.76 | 25.43 | 25.52 | 25.57 | 27.45 | 27.33 | 27.18 | 27.32 |
| 62 | Me-QRP-00061 | 22.89 | 22.47 | 22.49 | 22.62 | 24.34 | 24.05 | 24.05 | 24.15 | 24.75 | 24.74 | 24.76 | 24.75 |
| 63 | Me-QRP-00062 | 0.00  | 0.00  | 0.00  | 0.00  | 0.00  | 0.00  | 0.00  | 0.00  | 0.00  | 0.00  | 0.00  | 0.00  |
| 64 | Me-QRP-00063 | 0.00  | 0.00  | 0.00  | 0.00  | 0.00  | 0.00  | 0.00  | 0.00  | 0.00  | 0.00  | 0.00  | 0.00  |
| 65 | Me-QRP-00064 | 29.62 | 29.55 | 29.53 | 29.57 | 27.99 | 28.06 | 28.16 | 28.07 | 28.81 | 28.88 | 28.79 | 28.83 |
| 66 | Me-QRP-00065 | 29.44 | 29.32 | 29.45 | 29.40 | 27.84 | 27.85 | 27.76 | 27.82 | 28.27 | 28.15 | 28.12 | 28.18 |
| 67 | Me-QRP-00066 | 0.00  | 0.00  | 0.00  | 0.00  | 0.00  | 0.00  | 0.00  | 0.00  | 0.00  | 0.00  | 0.00  | 0.00  |
| 68 | Me-QRP-00067 | 0.00  | 0.00  | 0.00  | 0.00  | 0.00  | 0.00  | 0.00  | 0.00  | 0.00  | 0.00  | 0.00  | 0.00  |
| 69 | Me-QRP-00068 | 0.00  | 0.00  | 0.00  | 0.00  | 0.00  | 0.00  | 0.00  | 0.00  | 0.00  | 0.00  | 0.00  | 0.00  |
| 70 | Me-QRP-00008 | 27.07 | 26.80 | 26.79 | 26.89 | 25.74 | 25.65 | 25.53 | 25.64 | 25.77 | 25.72 | 25.77 | 25.75 |
| 71 | Me-QRP-00070 | 0.00  | 0.00  | 0.00  | 0.00  | 0.00  | 0.00  | 0.00  | 0.00  | 0.00  | 0.00  | 0.00  | 0.00  |
| 72 | Me-QRP-00071 | 25.07 | 24.85 | 24.91 | 24.95 | 23.33 | 22.91 | 23.17 | 23.14 | 23.79 | 23.74 | 23.75 | 23.76 |
| 73 | Me-QRP-00072 | 0.00  | 0.00  | 0.00  | 0.00  | 0.00  | 0.00  | 0.00  | 0.00  | 0.00  | 0.00  | 0.00  | 0.00  |
| 74 | Me-QRP-00073 | 26.31 | 26.08 | 26.05 | 26.15 | 25.13 | 24.84 | 24.87 | 24.94 | 25.03 | 24.98 | 25.07 | 25.02 |
| 75 | Me-QRP-00074 | 29.13 | 28.80 | 28.81 | 28.91 | 28.49 | 28.44 | 28.44 | 28.46 | 28.96 | 28.63 | 28.86 | 28.82 |
| 76 | Me-QRP-00075 | 24.85 | 24.51 | 24.47 | 24.61 | 23.11 | 23.18 | 23.14 | 23.14 | 23.04 | 22.93 | 22.91 | 22.96 |
| 77 | Me-QRP-00076 | 27.12 | 26.91 | 26.82 | 26.95 | 26.19 | 26.12 | 26.24 | 26.18 | 27.12 | 27.16 | 27.22 | 27.17 |
| 78 | Me-QRP-00077 | 25.51 | 25.21 | 25.31 | 25.34 | 24.20 | 23.96 | 23.99 | 24.05 | 25.42 | 25.55 | 25.50 | 25.49 |
| 79 | Me-QRP-00078 | 28.26 | 27.81 | 27.76 | 27.95 | 27.01 | 26.79 | 26.93 | 26.91 | 27.82 | 27.68 | 27.62 | 27.70 |
| 80 | Me-QRP-00079 | 28.26 | 27.81 | 27.76 | 27.95 | 27.01 | 26.79 | 26.93 | 26.91 | 27.82 | 27.68 | 27.62 | 27.70 |
| 81 | Me-QRP-00080 | 31.72 | 31.69 | 31.59 | 31.67 | 30.41 | 30.39 | 30.39 | 30.40 | 29.84 | 30.00 | 29.95 | 29.93 |
| 82 | Me-QRP-00081 | 0.00  | 26.75 | 27.51 | 27.13 | 26.25 | 25.93 | 26.91 | 26.36 | 26.55 | 26.79 | 26.98 | 26.77 |



|     |              |       |       |       |       |       |       |       |       |       |       |       |       |
|-----|--------------|-------|-------|-------|-------|-------|-------|-------|-------|-------|-------|-------|-------|
| 83  | Me-QRP-00082 | 28.02 | 27.78 | 27.70 | 27.84 | 27.04 | 27.09 | 27.00 | 27.04 | 27.79 | 27.82 | 27.70 | 27.77 |
| 84  | Me-QRP-00083 | 26.92 | 26.95 | 26.92 | 26.93 | 24.92 | 24.85 | 24.79 | 24.85 | 25.32 | 25.29 | 25.45 | 25.35 |
| 85  | Me-QRP-00084 | 25.21 | 25.31 | 25.73 | 25.41 | 26.18 | 26.14 | 26.14 | 26.15 | 26.35 | 26.38 | 26.55 | 26.43 |
| 86  | Me-QRP-00085 | 25.44 | 25.49 | 25.48 | 25.47 | 25.40 | 25.49 | 25.32 | 25.41 | 25.23 | 25.22 | 25.33 | 25.26 |
| 87  | Me-QRP-00086 | 25.77 | 25.44 | 25.28 | 25.50 | 23.70 | 23.58 | 23.58 | 23.62 | 23.99 | 23.96 | 23.97 | 23.97 |
| 88  | Me-QRP-00075 | 24.85 | 24.51 | 24.47 | 24.61 | 23.11 | 23.18 | 23.14 | 23.14 | 23.04 | 22.93 | 22.91 | 22.96 |
| 89  | Me-QRP-00088 | 25.84 | 25.73 | 25.70 | 25.76 | 23.70 | 23.67 | 23.54 | 23.63 | 23.29 | 23.18 | 23.62 | 23.36 |
| 90  | Me-QRP-00089 | 26.70 | 26.68 | 26.62 | 26.67 | 26.77 | 26.77 | 26.85 | 26.80 | 28.21 | 28.24 | 28.48 | 28.31 |
| 91  | Me-QRP-00090 | 29.61 | 27.28 | 29.26 | 28.72 | 28.54 | 28.81 | 28.72 | 28.69 | 29.73 | 29.73 | 29.75 | 29.74 |
| 92  | Me-QRP-00091 | 27.05 | 26.55 | 26.54 | 26.71 | 26.35 | 26.30 | 26.33 | 26.32 | 25.23 | 25.20 | 25.24 | 25.22 |
| 93  | Me-QRP-00092 | 25.88 | 25.82 | 25.73 | 25.81 | 26.70 | 26.35 | 26.24 | 26.43 | 25.61 | 25.49 | 25.53 | 25.54 |
| 94  | Me-QRP-00093 | 25.97 | 26.06 | 26.07 | 26.03 | 26.09 | 25.98 | 25.93 | 26.00 | 25.20 | 25.18 | 25.31 | 25.23 |
| 95  | Me-QRP-00094 | 28.20 | 28.05 | 28.08 | 28.11 | 28.56 | 28.28 | 28.12 | 28.32 | 26.95 | 26.97 | 27.10 | 27.00 |
| 96  | Me-QRP-00095 | 26.79 | 26.47 | 26.46 | 26.57 | 25.81 | 25.87 | 25.81 | 25.83 | 26.94 | 26.88 | 26.83 | 26.89 |
| 97  | Me-QRP-00096 | 26.09 | 25.73 | 25.57 | 25.80 | 26.11 | 26.05 | 26.04 | 26.07 | 26.18 | 26.11 | 26.15 | 26.15 |
| 98  | Me-QRP-00097 | 0.00  | 0.00  | 0.00  | 0.00  | 0.00  | 0.00  | 0.00  | 0.00  | 0.00  | 0.00  | 0.00  | 0.00  |
| 99  | Me-QRP-00098 | 26.56 | 26.14 | 26.05 | 26.25 | 24.17 | 24.25 | 24.19 | 24.20 | 24.15 | 24.02 | 24.17 | 24.11 |
| 100 | Me-QRP-00099 | 26.88 | 26.78 | 26.70 | 26.79 | 28.89 | 28.72 | 28.73 | 28.78 | 27.33 | 27.35 | 27.43 | 27.37 |
| 101 | Me-QRP-00100 | 0.00  | 0.00  | 0.00  | 0.00  | 0.00  | 0.00  | 0.00  | 0.00  | 0.00  | 0.00  | 0.00  | 0.00  |
| 102 | Me-QRP-00101 | 32.58 | 32.61 | 32.43 | 32.54 | 32.12 | 32.09 | 32.05 | 32.08 | 32.76 | 32.44 | 32.77 | 32.66 |
| 103 | Me-QRP-00102 | 28.90 | 28.61 | 28.49 | 28.67 | 26.57 | 26.28 | 26.31 | 26.39 | 25.67 | 25.51 | 25.66 | 25.61 |
| 104 | Me-QRP-00103 | 29.20 | 28.78 | 28.69 | 28.89 | 27.82 | 27.81 | 27.86 | 27.83 | 27.35 | 27.40 | 27.43 | 27.39 |
| 105 | Me-QRP-00104 | 25.27 | 25.00 | 24.97 | 25.08 | 24.84 | 24.61 | 24.42 | 24.63 | 25.01 | 24.81 | 24.98 | 24.93 |
| 106 | Me-QRP-00105 | 26.60 | 26.29 | 26.14 | 26.34 | 25.63 | 25.71 | 25.60 | 25.64 | 26.28 | 26.11 | 26.13 | 26.18 |
| 107 | Me-QRP-00106 | 28.05 | 28.07 | 28.01 | 28.04 | 27.09 | 26.94 | 26.81 | 26.95 | 26.44 | 26.30 | 26.38 | 26.37 |

**Supplementary Table S7 qPCR cycles of the genes in H124 at root bulking**

|    | Sample       | H124 leaves |       |       |        | H124 stems |       |       |        | H124 roots |       |       |        |
|----|--------------|-------------|-------|-------|--------|------------|-------|-------|--------|------------|-------|-------|--------|
|    |              | Ct1         | Ct2   | Ct3   | Ave.Ct | Ct1        | Ct2   | Ct3   | Ave.Ct | Ct1        | Ct2   | Ct3   | Ave.Ct |
| 1  | Me-QRP-90001 | 21.45       | 21.74 | 21.60 | 21.60  | 22.27      | 22.02 | 22.10 | 22.13  | 23.19      | 23.08 | 22.97 | 23.08  |
| 2  | Me-QRP-00001 | 23.93       | 23.96 | 23.94 | 23.94  | 23.77      | 23.68 | 23.72 | 23.72  | 24.59      | 24.69 | 24.65 | 24.64  |
| 3  | Me-QRP-00002 | 25.96       | 26.12 | 26.01 | 26.03  | 25.01      | 24.98 | 24.90 | 24.96  | 24.95      | 24.94 | 24.90 | 24.93  |
| 4  | Me-QRP-00003 | 0.00        | 0.00  | 0.00  | 0.00   | 0.00       | 0.00  | 0.00  | 0.00   | 0.00       | 0.00  | 0.00  | 0.00   |
| 5  | Me-QRP-00004 | 29.31       | 29.66 | 29.21 | 29.40  | 26.39      | 26.07 | 26.21 | 26.22  | 25.33      | 25.25 | 25.27 | 25.28  |
| 6  | Me-QRP-00005 | 24.04       | 24.08 | 24.01 | 24.04  | 23.62      | 23.48 | 23.53 | 23.54  | 24.46      | 24.27 | 24.29 | 24.34  |
| 7  | Me-QRP-00006 | 25.71       | 25.88 | 25.63 | 25.74  | 25.00      | 24.82 | 24.91 | 24.91  | 26.70      | 26.71 | 26.74 | 26.71  |
| 8  | Me-QRP-00007 | 26.09       | 26.18 | 26.13 | 26.13  | 25.86      | 25.71 | 25.70 | 25.76  | 27.77      | 27.70 | 27.58 | 27.68  |
| 9  | Me-QRP-00008 | 25.55       | 25.70 | 25.60 | 25.62  | 25.40      | 25.23 | 25.39 | 25.34  | 27.01      | 26.96 | 27.03 | 27.00  |
| 10 | Me-QRP-00009 | 27.04       | 26.86 | 26.79 | 26.90  | 25.98      | 25.63 | 25.93 | 25.85  | 28.88      | 28.64 | 28.45 | 28.66  |
| 11 | Me-QRP-00010 | 30.76       | 29.73 | 30.76 | 30.42  | 30.74      | 30.61 | 30.68 | 30.68  | 32.05      | 31.73 | 31.37 | 31.72  |
| 12 | Me-QRP-00011 | 24.47       | 24.63 | 24.43 | 24.51  | 24.48      | 24.17 | 24.36 | 24.34  | 25.30      | 24.79 | 24.71 | 24.93  |
| 13 | Me-QRP-00012 | 20.54       | 20.77 | 20.47 | 20.59  | 25.26      | 25.06 | 25.21 | 25.18  | 27.45      | 27.35 | 26.96 | 27.25  |
| 14 | Me-QRP-00013 | 25.90       | 25.90 | 25.90 | 25.90  | 25.97      | 25.70 | 25.63 | 25.77  | 26.30      | 26.23 | 26.15 | 26.23  |
| 15 | Me-QRP-00014 | 23.46       | 23.44 | 23.40 | 23.43  | 22.14      | 22.18 | 22.20 | 22.18  | 24.11      | 24.16 | 24.34 | 24.20  |
| 16 | Me-QRP-00015 | 24.80       | 24.82 | 24.83 | 24.82  | 23.98      | 23.72 | 23.69 | 23.80  | 24.34      | 24.29 | 24.25 | 24.29  |
| 17 | Me-QRP-00016 | 25.25       | 25.29 | 25.26 | 25.27  | 23.43      | 23.20 | 23.21 | 23.28  | 25.72      | 25.26 | 24.93 | 25.30  |
| 18 | Me-QRP-00017 | 23.18       | 23.75 | 23.30 | 23.41  | 22.20      | 22.02 | 22.20 | 22.14  | 22.96      | 22.69 | 22.74 | 22.80  |
| 19 | Me-QRP-00018 | 26.88       | 27.02 | 26.98 | 26.96  | 23.68      | 23.33 | 23.40 | 23.47  | 26.36      | 25.61 | 25.19 | 25.72  |
| 20 | Me-QRP-00019 | 29.22       | 29.35 | 29.28 | 29.28  | 26.33      | 26.26 | 26.10 | 26.23  | 26.78      | 26.37 | 26.16 | 26.43  |
| 21 | Me-QRP-00020 | 25.79       | 25.90 | 25.73 | 25.81  | 26.01      | 25.80 | 25.90 | 25.90  | 27.79      | 27.37 | 27.13 | 27.43  |
| 22 | Me-QRP-00021 | 29.70       | 29.80 | 29.27 | 29.59  | 30.64      | 30.10 | 30.37 | 30.37  | 30.45      | 30.18 | 30.14 | 30.26  |
| 23 | Me-QRP-00022 | 21.78       | 21.99 | 21.75 | 21.84  | 23.99      | 23.85 | 23.89 | 23.91  | 25.44      | 25.03 | 24.92 | 25.13  |
| 24 | Me-QRP-00023 | 25.43       | 25.54 | 25.41 | 25.46  | 24.82      | 24.79 | 24.53 | 24.71  | 27.66      | 27.33 | 26.89 | 27.29  |
| 25 | Me-QRP-00024 | 27.47       | 27.66 | 27.55 | 27.56  | 26.61      | 26.38 | 26.32 | 26.44  | 27.40      | 26.97 | 26.74 | 27.04  |
| 26 | Me-QRP-00025 | 35.53       | 35.78 | 35.04 | 35.45  | 33.72      | 34.10 | 33.98 | 33.94  | 33.73      | 34.03 | 33.39 | 33.72  |
| 27 | Me-QRP-00026 | 28.07       | 28.11 | 28.10 | 28.09  | 26.86      | 26.93 | 26.90 | 26.90  | 27.63      | 27.65 | 27.47 | 27.58  |
| 28 | Me-QRP-00027 | 24.99       | 25.11 | 25.11 | 25.07  | 25.41      | 25.58 | 25.56 | 25.52  | 26.49      | 26.50 | 26.39 | 26.46  |
| 29 | Me-QRP-00028 | 33.17       | 33.74 | 33.30 | 33.40  | 35.87      | 35.06 | 34.85 | 35.26  | 35.07      | 35.16 | 35.99 | 35.41  |
| 30 | Me-QRP-00029 | 0.00        | 0.00  | 0.00  | 0.00   | 0.00       | 0.00  | 0.00  | 0.00   | 0.00       | 0.00  | 0.00  | 0.00   |
| 31 | Me-QRP-00030 | 27.82       | 27.87 | 27.78 | 27.82  | 28.82      | 28.13 | 28.26 | 28.40  | 30.14      | 29.86 | 29.54 | 29.85  |
| 32 | Me-QRP-00031 | 28.01       | 28.00 | 27.97 | 27.99  | 28.90      | 28.62 | 28.60 | 28.71  | 29.91      | 29.79 | 29.45 | 29.71  |
| 33 | Me-QRP-00032 | 26.20       | 26.14 | 26.15 | 26.16  | 26.07      | 25.81 | 25.77 | 25.89  | 26.25      | 26.04 | 25.86 | 26.05  |
| 34 | Me-QRP-00033 | 26.88       | 27.05 | 26.80 | 26.91  | 24.04      | 23.83 | 23.94 | 23.94  | 26.99      | 26.78 | 26.74 | 26.84  |
| 35 | Me-QRP-00034 | 31.97       | 32.12 | 32.10 | 32.06  | 32.36      | 32.25 | 31.65 | 32.09  | 31.81      | 31.74 | 31.57 | 31.70  |
| 36 | Me-QRP-00035 | 0.00        | 0.00  | 0.00  | 0.00   | 0.00       | 0.00  | 0.00  | 0.00   | 0.00       | 0.00  | 0.00  | 0.00   |
| 37 | Me-QRP-00036 | 0.00        | 0.00  | 0.00  | 0.00   | 0.00       | 0.00  | 0.00  | 0.00   | 0.00       | 0.00  | 0.00  | 0.00   |
| 38 | Me-QRP-00037 | 30.76       | 31.16 | 30.58 | 30.83  | 30.74      | 30.56 | 30.24 | 30.51  | 31.71      | 31.43 | 31.45 | 31.53  |
| 39 | Me-QRP-00038 | 28.03       | 27.93 | 27.99 | 27.98  | 28.02      | 27.78 | 27.64 | 27.81  | 30.03      | 29.78 | 29.63 | 29.81  |

|    |              |       |       |       |       |       |       |       |       |       |       |       |       |
|----|--------------|-------|-------|-------|-------|-------|-------|-------|-------|-------|-------|-------|-------|
| 40 | Me-QRP-00039 | 0.00  | 0.00  | 0.00  | 0.00  | 0.00  | 0.00  | 0.00  | 0.00  | 0.00  | 0.00  | 0.00  | 0.00  |
| 41 | Me-QRP-00040 | 35.67 | 35.40 | 35.46 | 35.51 | 35.81 | 34.58 | 34.90 | 35.10 | 36.59 | 35.94 | N/A   | 36.26 |
| 42 | Me-QRP-00041 | 26.38 | 26.55 | 26.33 | 26.42 | 23.76 | 23.39 | 23.53 | 23.56 | 25.81 | 25.77 | 25.62 | 25.73 |
| 43 | Me-QRP-00042 | 30.02 | 30.17 | 30.16 | 30.12 | 30.70 | 30.52 | 30.37 | 30.53 | 31.44 | 31.20 | 31.18 | 31.27 |
| 44 | Me-QRP-00043 | 24.48 | 24.50 | 24.43 | 24.47 | 24.34 | 23.75 | 23.73 | 23.94 | 25.99 | 25.92 | 25.93 | 25.94 |
| 45 | Me-QRP-00044 | 0.00  | 0.00  | 0.00  | 0.00  | 0.00  | 0.00  | 0.00  | 0.00  | 0.00  | 0.00  | 0.00  | 0.00  |
| 46 | Me-QRP-00045 | 25.54 | 25.63 | 25.52 | 25.56 | 25.66 | 25.46 | 25.42 | 25.51 | 27.38 | 27.41 | 27.18 | 27.33 |
| 47 | Me-QRP-00046 | 28.44 | 28.52 | 28.35 | 28.44 | 30.25 | 30.44 | 30.55 | 30.41 | 30.84 | 30.87 | 30.85 | 30.85 |
| 48 | Me-QRP-00047 | 24.91 | 24.96 | 24.86 | 24.91 | 25.37 | 25.20 | 25.34 | 25.30 | 26.81 | 26.72 | 26.20 | 26.58 |
| 49 | Me-QRP-00048 | 29.87 | 30.01 | 29.79 | 29.89 | 35.14 | 35.31 | 35.79 | 35.41 | 37.30 | 36.42 | 37.43 | 37.05 |
| 50 | Me-QRP-00049 | 29.08 | 29.70 | 29.17 | 29.32 | 28.53 | 28.19 | 28.18 | 28.30 | 28.96 | 28.49 | 28.64 | 28.69 |
| 51 | Me-QRP-00050 | 28.27 | 28.29 | 28.12 | 28.23 | 33.69 | 33.47 | 33.71 | 33.62 | 32.59 | 32.93 | 32.76 | 32.76 |
| 52 | Me-QRP-00051 | 0.00  | 0.00  | 0.00  | 0.00  | 0.00  | 0.00  | 0.00  | 0.00  | 0.00  | 0.00  | 0.00  | 0.00  |
| 53 | Me-QRP-00052 | 26.58 | 26.74 | 26.58 | 26.63 | 25.67 | 25.51 | 25.52 | 25.56 | 25.67 | 25.57 | 25.50 | 25.58 |
| 54 | Me-QRP-00053 | 24.24 | 24.30 | 24.32 | 24.29 | 20.13 | 20.37 | 20.27 | 20.26 | 23.02 | 22.92 | 23.01 | 22.98 |
| 55 | Me-QRP-00054 | 22.79 | 22.97 | 22.88 | 22.88 | 25.42 | 25.58 | 25.57 | 25.52 | 27.76 | 27.69 | 27.67 | 27.71 |
| 56 | Me-QRP-00055 | 22.69 | 22.86 | 22.66 | 22.74 | 25.56 | 25.76 | 25.92 | 25.75 | 27.64 | 27.76 | 27.69 | 27.70 |
| 57 | Me-QRP-00056 | 26.29 | 26.47 | 26.24 | 26.33 | 28.16 | 28.12 | 28.02 | 28.10 | 28.18 | 28.02 | 27.95 | 28.05 |
| 58 | Me-QRP-00053 | 24.24 | 24.30 | 24.32 | 24.29 | 20.13 | 20.37 | 20.27 | 20.26 | 23.02 | 22.92 | 23.01 | 22.98 |
| 59 | Me-QRP-00058 | 19.88 | 19.74 | 19.91 | 19.84 | 24.36 | 24.41 | 24.16 | 24.31 | 21.99 | 21.63 | 21.70 | 21.78 |
| 60 | Me-QRP-00004 | 29.31 | 29.66 | 29.21 | 29.40 | 26.39 | 26.07 | 26.21 | 26.22 | 25.33 | 25.25 | 25.27 | 25.28 |
| 61 | Me-QRP-00060 | 25.15 | 25.18 | 25.08 | 25.14 | 25.57 | 25.42 | 25.34 | 25.44 | 27.31 | 27.15 | 27.14 | 27.20 |
| 62 | Me-QRP-00061 | 22.82 | 22.53 | 22.35 | 22.56 | 24.22 | 23.95 | 24.11 | 24.10 | 24.83 | 24.91 | 24.89 | 24.88 |
| 63 | Me-QRP-00062 | 0.00  | 0.00  | 0.00  | 0.00  | 0.00  | 0.00  | 0.00  | 0.00  | 0.00  | 0.00  | 0.00  | 0.00  |
| 64 | Me-QRP-00063 | 0.00  | 0.00  | 0.00  | 0.00  | 0.00  | 0.00  | 0.00  | 0.00  | 0.00  | 0.00  | 0.00  | 0.00  |
| 65 | Me-QRP-00064 | 28.15 | 28.20 | 28.14 | 28.16 | 27.96 | 28.03 | 27.98 | 27.99 | 30.15 | 30.09 | 30.05 | 30.10 |
| 66 | Me-QRP-00065 | 27.06 | 27.19 | 27.24 | 27.16 | 27.11 | 27.24 | 27.05 | 27.13 | 27.96 | 27.88 | 27.77 | 27.87 |
| 67 | Me-QRP-00066 | 0.00  | 0.00  | 0.00  | 0.00  | 0.00  | 0.00  | 0.00  | 0.00  | 0.00  | 0.00  | 0.00  | 0.00  |
| 68 | Me-QRP-00067 | 0.00  | 0.00  | 0.00  | 0.00  | 0.00  | 0.00  | 0.00  | 0.00  | 0.00  | 0.00  | 0.00  | 0.00  |
| 69 | Me-QRP-00068 | 0.00  | 0.00  | 0.00  | 0.00  | 0.00  | 0.00  | 0.00  | 0.00  | 0.00  | 0.00  | 0.00  | 0.00  |
| 70 | Me-QRP-00008 | 25.55 | 25.70 | 25.60 | 25.62 | 25.40 | 25.23 | 25.39 | 25.34 | 27.01 | 26.96 | 27.03 | 27.00 |
| 71 | Me-QRP-00070 | 0.00  | 0.00  | 0.00  | 0.00  | 0.00  | 0.00  | 0.00  | 0.00  | 0.00  | 0.00  | 0.00  | 0.00  |
| 72 | Me-QRP-00071 | 24.96 | 25.12 | 24.93 | 25.00 | 22.94 | 22.78 | 22.82 | 22.85 | 24.46 | 24.38 | 24.52 | 24.45 |
| 73 | Me-QRP-00072 | 0.00  | 0.00  | 0.00  | 0.00  | 0.00  | 0.00  | 0.00  | 0.00  | 0.00  | 0.00  | 0.00  | 0.00  |
| 74 | Me-QRP-00073 | 25.73 | 25.78 | 25.82 | 25.78 | 25.13 | 25.25 | 25.11 | 25.16 | 25.68 | 25.64 | 25.73 | 25.68 |
| 75 | Me-QRP-00074 | 28.04 | 28.00 | 27.90 | 27.98 | 28.89 | 28.74 | 28.60 | 28.74 | 29.74 | 29.59 | 29.69 | 29.68 |
| 76 | Me-QRP-00075 | 22.31 | 22.20 | 22.14 | 22.22 | 22.37 | 22.11 | 22.10 | 22.19 | 24.53 | 24.43 | 24.43 | 24.46 |
| 77 | Me-QRP-00076 | 25.43 | 25.59 | 25.42 | 25.48 | 26.50 | 26.19 | 26.13 | 26.27 | 26.84 | 26.75 | 26.75 | 26.78 |
| 78 | Me-QRP-00077 | 24.74 | 24.99 | 24.73 | 24.82 | 24.74 | 24.58 | 24.74 | 24.69 | 26.14 | 26.19 | 26.25 | 26.20 |
| 79 | Me-QRP-00078 | 26.21 | 26.23 | 26.19 | 26.21 | 25.17 | 25.12 | 25.02 | 25.10 | 27.11 | 27.06 | 27.07 | 27.08 |
| 80 | Me-QRP-00079 | 26.21 | 26.23 | 26.19 | 26.21 | 25.17 | 25.12 | 25.02 | 25.10 | 27.11 | 27.06 | 27.07 | 27.08 |
| 81 | Me-QRP-00080 | 30.05 | 30.29 | 30.23 | 30.19 | 29.20 | 29.48 | 29.37 | 29.35 | 30.06 | 29.92 | 30.02 | 30.00 |
| 82 | Me-QRP-00081 | 26.79 | 27.39 | 25.84 | 26.67 | 27.31 | 27.03 | 26.65 | 26.99 | 29.00 | 29.36 | 27.13 | 28.50 |

|     |              |       |       |       |       |       |       |       |       |       |       |       |       |
|-----|--------------|-------|-------|-------|-------|-------|-------|-------|-------|-------|-------|-------|-------|
| 83  | Me-QRP-00082 | 26.31 | 26.38 | 26.36 | 26.35 | 27.28 | 26.90 | 26.98 | 27.05 | 27.24 | 27.16 | 27.04 | 27.15 |
| 84  | Me-QRP-00083 | 26.50 | 26.67 | 26.53 | 26.57 | 24.71 | 24.61 | 24.61 | 24.64 | 25.95 | 25.85 | 25.88 | 25.89 |
| 85  | Me-QRP-00084 | 24.66 | 24.83 | 24.74 | 24.74 | 26.01 | 26.14 | 26.15 | 26.10 | 27.33 | 27.33 | 27.33 | 27.33 |
| 86  | Me-QRP-00085 | 24.69 | 24.81 | 24.79 | 24.76 | 25.18 | 25.29 | 25.38 | 25.29 | 25.29 | 25.34 | 25.26 | 25.30 |
| 87  | Me-QRP-00086 | 24.91 | 24.93 | 24.87 | 24.90 | 23.59 | 23.18 | 23.08 | 23.28 | 25.41 | 25.37 | 25.31 | 25.36 |
| 88  | Me-QRP-00075 | 22.31 | 22.20 | 22.14 | 22.22 | 22.37 | 22.11 | 22.10 | 22.19 | 24.53 | 24.43 | 24.43 | 24.46 |
| 89  | Me-QRP-00088 | 24.40 | 24.53 | 24.50 | 24.48 | 22.07 | 22.24 | 22.23 | 22.18 | 25.43 | 25.35 | 25.28 | 25.36 |
| 90  | Me-QRP-00089 | 25.39 | 25.53 | 25.38 | 25.43 | 27.04 | 27.17 | 27.07 | 27.09 | 28.17 | 28.17 | 27.88 | 28.07 |
| 91  | Me-QRP-00090 | 28.25 | 28.45 | 28.63 | 28.44 | 29.73 | 28.75 | 28.75 | 29.08 | 30.06 | 30.37 | 30.15 | 30.19 |
| 92  | Me-QRP-00091 | 24.50 | 24.40 | 24.45 | 24.45 | 25.42 | 25.02 | 25.05 | 25.16 | 24.63 | 24.46 | 24.44 | 24.51 |
| 93  | Me-QRP-00092 | 24.87 | 25.00 | 24.84 | 24.90 | 25.94 | 25.88 | 25.89 | 25.90 | 26.67 | 26.52 | 26.51 | 26.57 |
| 94  | Me-QRP-00093 | 24.98 | 25.06 | 25.19 | 25.08 | 25.72 | 25.90 | 25.86 | 25.83 | 26.63 | 26.72 | 27.00 | 26.78 |
| 95  | Me-QRP-00094 | 26.83 | 27.05 | 27.03 | 26.97 | 27.13 | 27.30 | 27.33 | 27.25 | 28.42 | 28.44 | 28.20 | 28.36 |
| 96  | Me-QRP-00095 | 25.52 | 25.54 | 25.41 | 25.49 | 26.29 | 25.98 | 25.92 | 26.07 | 27.55 | 27.33 | 27.33 | 27.40 |
| 97  | Me-QRP-00096 | 25.18 | 25.09 | 25.14 | 25.14 | 27.08 | 26.80 | 26.71 | 26.86 | 27.69 | 27.55 | 27.49 | 27.57 |
| 98  | Me-QRP-00097 | 0.00  | 0.00  | 0.00  | 0.00  | 0.00  | 0.00  | 0.00  | 0.00  | 0.00  | 0.00  | 0.00  | 0.00  |
| 99  | Me-QRP-00098 | 25.50 | 25.65 | 25.86 | 25.67 | 25.18 | 25.05 | 24.82 | 25.02 | 25.28 | 25.22 | 25.18 | 25.23 |
| 100 | Me-QRP-00099 | 26.56 | 26.37 | 26.36 | 26.43 | 27.74 | 27.63 | 27.72 | 27.70 | 26.81 | 26.58 | 26.48 | 26.62 |
| 101 | Me-QRP-00100 | 0.00  | 0.00  | 0.00  | 0.00  | 0.00  | 0.00  | 0.00  | 0.00  | 0.00  | 0.00  | 0.00  | 0.00  |
| 102 | Me-QRP-00101 | 32.44 | 32.71 | 32.70 | 32.62 | 32.87 | 32.93 | 32.76 | 32.85 | 33.80 | 33.94 | 33.82 | 33.85 |
| 103 | Me-QRP-00102 | 27.21 | 27.32 | 27.31 | 27.28 | 25.04 | 25.22 | 25.22 | 25.16 | 26.64 | 26.55 | 26.44 | 26.54 |
| 104 | Me-QRP-00103 | 27.53 | 27.46 | 27.54 | 27.51 | 27.84 | 27.20 | 27.22 | 27.42 | 29.67 | 29.61 | 29.63 | 29.64 |
| 105 | Me-QRP-00104 | 24.36 | 24.13 | 24.27 | 24.25 | 25.38 | 25.42 | 25.43 | 25.41 | 26.62 | 26.43 | 26.22 | 26.42 |
| 106 | Me-QRP-00105 | 25.30 | 25.34 | 25.29 | 25.31 | 26.36 | 26.10 | 26.08 | 26.18 | 27.20 | 27.14 | 27.17 | 27.17 |
| 107 | Me-QRP-00106 | 27.19 | 27.46 | 27.27 | 27.30 | 26.11 | 26.23 | 26.20 | 26.18 | 26.17 | 26.17 | 26.08 | 26.14 |



|    |              |       |       |       |       |       |       |       |       |       |       |       |       |
|----|--------------|-------|-------|-------|-------|-------|-------|-------|-------|-------|-------|-------|-------|
| 41 | Me-QRP-00040 | 33.37 | 34.13 | 33.21 | 33.57 | 35.65 | 35.17 | 35.21 | 35.34 | 34.99 | 34.69 | 35.19 | 34.96 |
| 42 | Me-QRP-00041 | 24.83 | 25.14 | 24.74 | 24.90 | 24.55 | 24.70 | 24.70 | 24.65 | 23.30 | 22.94 | 23.14 | 23.12 |
| 43 | Me-QRP-00042 | 28.34 | 28.30 | 28.04 | 28.23 | 30.32 | 30.57 | 30.43 | 30.44 | 30.55 | 30.23 | 30.40 | 30.39 |
| 44 | Me-QRP-00043 | 22.87 | 22.62 | 22.64 | 22.71 | 24.84 | 24.71 | 24.83 | 24.80 | 24.31 | 24.39 | 24.33 | 24.34 |
| 45 | Me-QRP-00044 | 0.00  | 0.00  | 0.00  | 0.00  | 0.00  | 0.00  | 0.00  | 0.00  | 0.00  | 0.00  | 0.00  | 0.00  |
| 46 | Me-QRP-00045 | 23.97 | 23.98 | 23.86 | 23.93 | 25.51 | 25.77 | 25.78 | 25.69 | 26.48 | 26.47 | 26.43 | 26.46 |
| 47 | Me-QRP-00046 | 26.55 | 26.54 | 26.31 | 26.47 | 29.16 | 29.13 | 29.15 | 29.15 | 30.00 | 29.89 | 29.93 | 29.94 |
| 48 | Me-QRP-00047 | 23.46 | 23.46 | 23.35 | 23.42 | 25.03 | 25.11 | 25.13 | 25.09 | 25.79 | 25.91 | 25.81 | 25.83 |
| 49 | Me-QRP-00048 | 27.80 | 27.71 | 27.60 | 27.70 | 34.32 | 33.81 | 33.45 | 33.86 | 34.12 | 34.00 | 34.03 | 34.05 |
| 50 | Me-QRP-00049 | 27.87 | 27.78 | 27.75 | 27.80 | 28.06 | 28.53 | 28.24 | 28.27 | 26.34 | 26.60 | 26.35 | 26.43 |
| 51 | Me-QRP-00050 | 27.65 | 27.30 | 27.37 | 27.44 | 34.26 | 34.89 | 33.35 | 34.17 | 31.71 | 32.11 | 31.93 | 31.92 |
| 52 | Me-QRP-00051 | 0.00  | 0.00  | 0.00  | 0.00  | 0.00  | 0.00  | 0.00  | 0.00  | 0.00  | 0.00  | 0.00  | 0.00  |
| 53 | Me-QRP-00052 | 25.28 | 25.20 | 25.09 | 25.19 | 26.26 | 26.43 | 26.56 | 26.42 | 24.21 | 24.24 | 24.20 | 24.22 |
| 54 | Me-QRP-00053 | 25.51 | 25.37 | 25.51 | 25.46 | 18.83 | 18.87 | 18.84 | 18.85 | 24.00 | 24.08 | 24.09 | 24.05 |
| 55 | Me-QRP-00054 | 21.61 | 21.47 | 21.38 | 21.49 | 26.31 | 26.09 | 26.28 | 26.23 | 26.37 | 26.43 | 26.48 | 26.43 |
| 56 | Me-QRP-00055 | 21.28 | 21.26 | 21.26 | 21.27 | 26.03 | 26.27 | 26.25 | 26.18 | 26.19 | 25.84 | 26.27 | 26.10 |
| 57 | Me-QRP-00056 | 25.05 | 25.06 | 24.85 | 24.98 | 28.44 | 28.54 | 28.65 | 28.54 | 26.80 | 26.75 | 26.77 | 26.77 |
| 58 | Me-QRP-00053 | 25.51 | 25.37 | 25.51 | 25.46 | 18.83 | 18.87 | 18.84 | 18.85 | 24.00 | 24.08 | 24.09 | 24.05 |
| 59 | Me-QRP-00058 | 21.03 | 21.12 | 21.23 | 21.13 | 22.94 | 23.19 | 23.17 | 23.10 | 22.80 | 22.43 | 22.94 | 22.72 |
| 60 | Me-QRP-00004 | 27.95 | 28.00 | 28.01 | 27.99 | 26.91 | 27.10 | 27.06 | 27.02 | 23.71 | 23.85 | 23.90 | 23.82 |
| 61 | Me-QRP-00060 | 22.77 | 22.79 | 22.64 | 22.73 | 25.24 | 25.26 | 25.47 | 25.32 | 25.55 | 25.59 | 25.53 | 25.56 |
| 62 | Me-QRP-00061 | 20.24 | 20.25 | 20.17 | 20.22 | 24.11 | 24.10 | 24.21 | 24.14 | 24.69 | 24.73 | 24.70 | 24.71 |
| 63 | Me-QRP-00062 | 0.00  | 0.00  | 0.00  | 0.00  | 0.00  | 0.00  | 0.00  | 0.00  | 0.00  | 0.00  | 0.00  | 0.00  |
| 64 | Me-QRP-00063 | 0.00  | 0.00  | 0.00  | 0.00  | 0.00  | 0.00  | 0.00  | 0.00  | 0.00  | 0.00  | 0.00  | 0.00  |
| 65 | Me-QRP-00064 | 26.14 | 25.89 | 25.77 | 25.93 | 27.32 | 27.39 | 27.39 | 27.37 | 27.95 | 27.87 | 27.89 | 27.90 |
| 66 | Me-QRP-00065 | 24.67 | 24.53 | 24.40 | 24.53 | 26.40 | 26.57 | 26.21 | 26.39 | 27.95 | 27.81 | 27.86 | 27.87 |
| 67 | Me-QRP-00066 | 0.00  | 0.00  | 0.00  | 0.00  | 0.00  | 0.00  | 0.00  | 0.00  | 0.00  | 0.00  | 0.00  | 0.00  |
| 68 | Me-QRP-00067 | 0.00  | 0.00  | 0.00  | 0.00  | 0.00  | 0.00  | 0.00  | 0.00  | 0.00  | 0.00  | 0.00  | 0.00  |
| 69 | Me-QRP-00068 | 0.00  | 0.00  | 0.00  | 0.00  | 0.00  | 0.00  | 0.00  | 0.00  | 0.00  | 0.00  | 0.00  | 0.00  |
| 70 | Me-QRP-00008 | 23.89 | 23.82 | 23.77 | 23.83 | 26.33 | 26.46 | 26.78 | 26.52 | 25.71 | 25.87 | 25.80 | 25.79 |
| 71 | Me-QRP-00070 | 0.00  | 0.00  | 0.00  | 0.00  | 0.00  | 0.00  | 0.00  | 0.00  | 0.00  | 0.00  | 0.00  | 0.00  |
| 72 | Me-QRP-00071 | 22.24 | 22.24 | 22.18 | 22.22 | 22.88 | 23.04 | 23.03 | 22.98 | 23.44 | 23.51 | 23.42 | 23.46 |
| 73 | Me-QRP-00072 | 0.00  | 0.00  | 0.00  | 0.00  | 0.00  | 0.00  | 0.00  | 0.00  | 0.00  | 0.00  | 0.00  | 0.00  |
| 74 | Me-QRP-00073 | 24.66 | 24.52 | 24.46 | 24.55 | 25.90 | 25.77 | 25.80 | 25.82 | 25.42 | 25.44 | 25.28 | 25.38 |
| 75 | Me-QRP-00074 | 26.93 | 26.79 | 26.76 | 26.83 | 29.17 | 29.14 | 29.34 | 29.22 | 27.61 | 27.75 | 27.45 | 27.61 |
| 76 | Me-QRP-00075 | 21.04 | 20.93 | 20.82 | 20.93 | 22.96 | 22.89 | 22.89 | 22.91 | 23.94 | 24.06 | 23.96 | 23.99 |
| 77 | Me-QRP-00076 | 23.83 | 23.56 | 23.45 | 23.61 | 26.46 | 26.38 | 26.68 | 26.51 | 25.17 | 25.17 | 24.99 | 25.11 |
| 78 | Me-QRP-00077 | 23.23 | 23.20 | 23.18 | 23.20 | 24.86 | 25.01 | 24.95 | 24.94 | 25.30 | 25.47 | 25.37 | 25.38 |
| 79 | Me-QRP-00078 | 24.15 | 24.23 | 24.08 | 24.15 | 25.67 | 25.89 | 25.90 | 25.82 | 25.44 | 25.54 | 25.60 | 25.52 |
| 80 | Me-QRP-00079 | 24.15 | 24.23 | 24.08 | 24.15 | 25.67 | 25.89 | 25.90 | 25.82 | 25.44 | 25.54 | 25.60 | 25.52 |
| 81 | Me-QRP-00080 | 27.94 | 27.87 | 27.76 | 27.86 | 29.16 | 29.18 | 29.05 | 29.13 | 28.99 | 29.04 | 29.25 | 29.09 |
| 82 | Me-QRP-00081 | 25.10 | 24.55 | 24.88 | 24.84 | 26.44 | 26.10 | 27.56 | 26.70 | 25.71 | 25.29 | 26.50 | 25.83 |
| 83 | Me-QRP-00082 | 24.84 | 24.73 | 24.63 | 24.73 | 27.29 | 27.22 | 27.37 | 27.30 | 26.02 | 25.86 | 25.81 | 25.89 |

|     |              |       |       |       |       |       |       |       |       |       |       |       |       |
|-----|--------------|-------|-------|-------|-------|-------|-------|-------|-------|-------|-------|-------|-------|
| 84  | Me-QRP-00083 | 24.18 | 24.16 | 24.05 | 24.13 | 24.99 | 24.90 | 24.87 | 24.92 | 24.99 | 24.91 | 24.91 | 24.94 |
| 85  | Me-QRP-00084 | 23.59 | 23.48 | 23.33 | 23.47 | 26.94 | 26.84 | 26.86 | 26.88 | 26.63 | 26.25 | 26.21 | 26.36 |
| 86  | Me-QRP-00085 | 23.46 | 23.53 | 23.35 | 23.45 | 26.16 | 26.07 | 26.06 | 26.10 | 23.84 | 23.84 | 23.75 | 23.81 |
| 87  | Me-QRP-00086 | 22.22 | 22.13 | 22.02 | 22.12 | 24.05 | 23.73 | 24.06 | 23.95 | 24.87 | 24.84 | 24.81 | 24.84 |
| 88  | Me-QRP-00075 | 21.04 | 20.93 | 20.82 | 20.93 | 22.96 | 22.89 | 22.89 | 22.91 | 23.94 | 24.06 | 23.96 | 23.99 |
| 89  | Me-QRP-00088 | 22.59 | 22.54 | 22.43 | 22.52 | 23.84 | 23.75 | 23.71 | 23.77 | 23.88 | 23.78 | 23.77 | 23.81 |
| 90  | Me-QRP-00089 | 23.99 | 23.81 | 23.79 | 23.86 | 27.93 | 28.00 | 27.89 | 27.94 | 27.45 | 27.31 | 27.50 | 27.42 |
| 91  | Me-QRP-00090 | 26.70 | 26.63 | 26.51 | 26.61 | 29.24 | 29.00 | 29.49 | 29.24 | 29.11 | 29.07 | 29.10 | 29.09 |
| 92  | Me-QRP-00091 | 23.60 | 23.33 | 23.29 | 23.40 | 25.34 | 25.27 | 25.54 | 25.38 | 24.81 | 24.82 | 24.84 | 24.82 |
| 93  | Me-QRP-00092 | 23.38 | 23.30 | 23.18 | 23.29 | 26.79 | 26.67 | 26.58 | 26.68 | 25.08 | 25.21 | 25.05 | 25.11 |
| 94  | Me-QRP-00093 | 23.42 | 23.48 | 23.33 | 23.41 | 26.61 | 26.65 | 26.73 | 26.66 | 25.13 | 25.12 | 25.09 | 25.11 |
| 95  | Me-QRP-00094 | 24.98 | 24.90 | 24.82 | 24.90 | 26.68 | 28.35 | 28.25 | 28.30 | 27.23 | 26.60 | 26.88 | 26.90 |
| 96  | Me-QRP-00095 | 23.73 | 23.47 | 23.46 | 23.55 | 26.95 | 27.09 | 26.81 | 26.95 | 26.43 | 26.58 | 26.39 | 26.47 |
| 97  | Me-QRP-00096 | 23.78 | 23.58 | 23.53 | 23.63 | 27.11 | 27.16 | 27.18 | 27.15 | 26.60 | 26.59 | 37.04 | 30.08 |
| 98  | Me-QRP-00097 | 0.00  | 0.00  | 0.00  | 0.00  | 0.00  | 0.00  | 0.00  | 0.00  | 0.00  | 0.00  | 0.00  | 0.00  |
| 99  | Me-QRP-00098 | 24.36 | 24.20 | 24.19 | 24.25 | 25.89 | 25.85 | 25.89 | 25.88 | 24.31 | 24.38 | 24.31 | 24.33 |
| 100 | Me-QRP-00099 | 27.07 | 27.10 | 27.17 | 27.11 | 26.22 | 25.91 | 25.94 | 26.02 | 27.27 | 27.17 | 27.16 | 27.20 |
| 101 | Me-QRP-00100 | 0.00  | 0.00  | 0.00  | 0.00  | 0.00  | 0.00  | 0.00  | 0.00  | 0.00  | 0.00  | 0.00  | 0.00  |
| 102 | Me-QRP-00101 | 29.56 | 29.56 | 29.39 | 29.50 | 31.85 | 31.75 | 31.65 | 31.75 | 30.75 | 30.53 | 30.69 | 30.66 |
| 103 | Me-QRP-00102 | 25.21 | 25.01 | 24.90 | 25.04 | 26.67 | 26.58 | 26.52 | 26.59 | 25.81 | 25.71 | 25.70 | 25.74 |
| 104 | Me-QRP-00103 | 25.96 | 25.77 | 25.76 | 25.83 | 28.78 | 28.64 | 28.53 | 28.65 | 27.84 | 27.81 | 27.93 | 27.86 |
| 105 | Me-QRP-00104 | 23.89 | 23.73 | 23.65 | 23.76 | 26.49 | 26.28 | 26.32 | 26.36 | 25.91 | 25.82 | 25.82 | 25.85 |
| 106 | Me-QRP-00105 | 24.29 | 23.97 | 23.95 | 24.07 | 26.97 | 26.96 | 26.93 | 26.95 | 25.71 | 25.73 | 25.73 | 25.72 |
| 107 | Me-QRP-00106 | 25.89 | 25.76 | 25.71 | 25.79 | 27.01 | 27.06 | 26.99 | 27.02 | 26.18 | 26.14 | 26.07 | 26.13 |

**Supplementary Table S9** qPCR cycles of the genes in H124 at root maturity

|    | Sample       | H124 leaves |       |       |       | H124 stems |       |       |       | H124 roots |       |       |       |
|----|--------------|-------------|-------|-------|-------|------------|-------|-------|-------|------------|-------|-------|-------|
|    |              | primer ID   | Ct1   | Ct2   | Ct3   | Ave.Ct     | Ct1   | Ct2   | Ct3   | Ave.Ct     | Ct1   | Ct2   | Ct3   |
| 1  | Me-QRP-90001 | 21.34       | 21.43 | 21.50 | 21.42 | 22.13      | 22.16 | 22.24 | 22.18 | 23.51      | 23.55 | 23.74 | 23.60 |
| 2  | Me-QRP-00001 | 22.19       | 22.53 | 22.12 | 22.28 | 24.65      | 24.78 | 24.71 | 24.71 | 25.86      | 25.92 | 25.87 | 25.88 |
| 3  | Me-QRP-00002 | 24.99       | 25.24 | 25.23 | 25.15 | 23.96      | 23.96 | 24.01 | 23.98 | 26.09      | 26.01 | 26.20 | 26.10 |
| 4  | Me-QRP-00003 | 0.00        | 0.00  | 0.00  | 0.00  | 0.00       | 0.00  | 0.00  | 0.00  | 0.00       | 0.00  | 0.00  | 0.00  |
| 5  | Me-QRP-00004 | 28.82       | 28.97 | 28.56 | 28.78 | 25.85      | 25.88 | 25.89 | 25.87 | 26.21      | 26.20 | 26.26 | 26.22 |
| 6  | Me-QRP-00005 | 23.89       | 23.98 | 23.89 | 23.92 | 23.22      | 23.30 | 23.34 | 23.29 | 24.19      | 24.29 | 24.69 | 24.39 |
| 7  | Me-QRP-00006 | 25.80       | 25.92 | 25.72 | 25.81 | 24.46      | 24.50 | 24.52 | 24.50 | 26.82      | 26.95 | 27.03 | 26.93 |
| 8  | Me-QRP-00007 | 24.45       | 24.68 | 24.56 | 24.56 | 25.30      | 25.30 | 25.37 | 25.33 | 27.49      | 27.41 | 27.52 | 27.47 |
| 9  | Me-QRP-00008 | 25.74       | 25.75 | 25.74 | 25.74 | 25.86      | 25.94 | 25.93 | 25.91 | 27.66      | 27.70 | 27.77 | 27.71 |
| 10 | Me-QRP-00009 | 24.97       | 24.90 | 24.84 | 24.90 | 27.32      | 27.25 | 27.52 | 27.36 | 27.67      | 27.57 | 27.41 | 27.55 |
| 11 | Me-QRP-00010 | 28.97       | 29.12 | 29.06 | 29.05 | 29.89      | 29.85 | 29.92 | 29.88 | 31.03      | 31.26 | 31.32 | 31.20 |
| 12 | Me-QRP-00011 | 23.34       | 23.48 | 23.44 | 23.42 | 23.68      | 23.79 | 23.77 | 23.75 | 25.83      | 25.85 | 25.93 | 25.87 |
| 13 | Me-QRP-00012 | 20.82       | 21.23 | 21.10 | 21.05 | 25.62      | 25.77 | 25.74 | 25.71 | 27.79      | 27.92 | 27.95 | 27.89 |
| 14 | Me-QRP-00013 | 25.17       | 25.14 | 25.26 | 25.19 | 23.96      | 23.71 | 23.72 | 23.80 | 22.87      | 22.89 | 22.92 | 22.89 |
| 15 | Me-QRP-00014 | 23.52       | 23.54 | 23.52 | 23.53 | 23.44      | 23.21 | 23.26 | 23.31 | 23.98      | 23.97 | 23.92 | 23.95 |
| 16 | Me-QRP-00015 | 24.85       | 24.85 | 24.93 | 24.88 | 24.18      | 24.05 | 24.11 | 24.11 | 25.67      | 25.76 | 25.71 | 25.71 |
| 17 | Me-QRP-00016 | 24.24       | 24.54 | 24.42 | 24.40 | 23.88      | 23.95 | 23.99 | 23.94 | 25.30      | 25.33 | 25.52 | 25.38 |
| 18 | Me-QRP-00017 | 24.14       | 24.43 | 24.25 | 24.27 | 22.74      | 22.79 | 22.77 | 22.77 | 23.95      | 24.91 | 24.84 | 24.57 |
| 19 | Me-QRP-00018 | 27.00       | 27.13 | 27.14 | 27.09 | 24.42      | 24.57 | 24.56 | 24.52 | 25.60      | 25.47 | 25.80 | 25.62 |
| 20 | Me-QRP-00019 | 27.00       | 27.18 | 27.07 | 27.08 | 28.00      | 28.17 | 28.16 | 28.11 | 27.02      | 27.18 | 27.32 | 27.17 |
| 21 | Me-QRP-00020 | 25.41       | 25.62 | 25.51 | 25.51 | 26.13      | 26.13 | 26.07 | 26.11 | N/A        | 27.94 | 27.99 | 27.97 |
| 22 | Me-QRP-00021 | 28.52       | 28.77 | 28.59 | 28.63 | 29.60      | 29.60 | 29.82 | 29.67 | 32.08      | 32.14 | 32.55 | 32.26 |
| 23 | Me-QRP-00022 | 24.33       | 24.54 | 24.31 | 24.39 | 23.95      | 23.98 | 23.96 | 23.96 | 24.86      | 24.88 | 24.98 | 24.90 |
| 24 | Me-QRP-00023 | 25.09       | 25.18 | 25.02 | 25.10 | 24.94      | 24.96 | 24.92 | 24.94 | 27.32      | 27.36 | 27.62 | 27.43 |
| 25 | Me-QRP-00024 | 27.13       | 27.29 | 27.24 | 27.22 | 26.73      | 26.80 | 26.68 | 26.74 | 28.12      | 28.14 | 28.31 | 28.19 |
| 26 | Me-QRP-00025 | 33.89       | 34.25 | 34.23 | 34.12 | 32.85      | 33.44 | 32.92 | 33.07 | 34.80      | 34.85 | 34.38 | 34.68 |
| 27 | Me-QRP-00026 | 28.80       | 28.64 | 29.03 | 28.82 | 29.26      | 29.04 | 29.32 | 29.21 | 27.72      | 27.62 | 27.63 | 27.66 |
| 28 | Me-QRP-00027 | 24.66       | 24.59 | 24.77 | 24.67 | 26.16      | 25.92 | 25.88 | 25.99 | 27.80      | 27.76 | 27.65 | 27.74 |
| 29 | Me-QRP-00028 | 33.10       | 32.71 | 32.74 | 32.85 | 35.62      | 35.98 | 35.55 | 35.72 | 36.19      | 37.64 | 36.36 | 36.73 |
| 30 | Me-QRP-00029 | 0.00        | 0.00  | 0.00  | 0.00  | 0.00       | 0.00  | 0.00  | 0.00  | 0.00       | 0.00  | 0.00  | 0.00  |
| 31 | Me-QRP-00030 | 27.39       | 27.55 | 27.35 | 27.43 | 28.52      | 28.59 | 28.52 | 28.54 | 30.89      | 30.90 | 31.02 | 30.94 |
| 32 | Me-QRP-00031 | 27.25       | 27.11 | 27.26 | 27.20 | 28.57      | 28.34 | 28.30 | 28.40 | 30.31      | 30.84 | 30.32 | 30.49 |
| 33 | Me-QRP-00032 | 25.85       | 25.96 | 25.86 | 25.89 | 25.80      | 25.86 | 25.97 | 25.88 | 26.71      | 26.78 | 26.92 | 26.80 |
| 34 | Me-QRP-00033 | 27.56       | 27.73 | 27.58 | 27.62 | 26.17      | 26.21 | 26.18 | 26.19 | 26.58      | 26.64 | 26.61 | 26.61 |
| 35 | Me-QRP-00034 | 32.22       | 32.79 | 32.34 | 32.45 | 31.46      | 31.37 | 31.47 | 31.43 | 31.73      | 31.42 | 31.75 | 31.63 |
| 36 | Me-QRP-00035 | 0.00        | 0.00  | 0.00  | 0.00  | 0.00       | 0.00  | 0.00  | 0.00  | 0.00       | 0.00  | 0.00  | 0.00  |
| 37 | Me-QRP-00036 | 0.00        | 0.00  | 0.00  | 0.00  | 0.00       | 0.00  | 0.00  | 0.00  | 0.00       | 0.00  | 0.00  | 0.00  |
| 38 | Me-QRP-00037 | 29.48       | 29.55 | 29.48 | 29.50 | 29.92      | 30.04 | 29.98 | 29.98 | 31.82      | 32.11 | 31.90 | 31.94 |
| 39 | Me-QRP-00038 | 27.12       | 27.08 | 27.20 | 27.13 | 28.16      | 28.09 | 28.15 | 28.13 | 30.67      | 30.75 | 30.56 | 30.66 |



|    |              |       |       |       |       |       |       |       |       |       |       |       |         |
|----|--------------|-------|-------|-------|-------|-------|-------|-------|-------|-------|-------|-------|---------|
| 40 | Me-QRP-00039 | 0.00  | 0.00  | 0.00  | 0.00  | 0.00  | 0.00  | 0.00  | 0.00  | 0.00  | 0.00  | 0.00  | 0.00    |
| 41 | Me-QRP-00040 | 34.41 | 34.01 | 34.68 | 34.37 | 35.73 | 34.42 | 34.42 | 34.86 | 37.68 | 37.80 | 36.69 | 37.39   |
| 42 | Me-QRP-00041 | 24.46 | 24.46 | 24.51 | 24.48 | 21.98 | 22.02 | 21.97 | 21.99 | 22.47 | 22.74 | 22.72 | 22.64   |
| 43 | Me-QRP-00042 | 29.62 | 29.76 | 29.64 | 29.67 | 30.32 | 30.22 | 30.19 | 30.24 | 31.91 | 31.88 | 31.93 | 31.91   |
| 44 | Me-QRP-00043 | 24.12 | 24.07 | 24.13 | 24.11 | 24.34 | 24.17 | 24.12 | 24.21 | 26.03 | 26.05 | 26.10 | 26.06   |
| 45 | Me-QRP-00044 | 0.00  | 0.00  | 0.00  | 0.00  | 0.00  | 0.00  | 0.00  | 0.00  | 0.00  | 0.00  | 0.00  | 0.00    |
| 46 | Me-QRP-00045 | 23.85 | 24.17 | 23.99 | 24.00 | 25.24 | 25.29 | 25.33 | 25.29 | 28.11 | 28.08 | 28.23 | 28.14   |
| 47 | Me-QRP-00046 | 26.31 | 26.55 | 26.63 | 26.50 | 29.81 | 29.82 | 29.93 | 29.85 | 31.23 | 31.32 | 32.09 | 31.55   |
| 48 | Me-QRP-00047 | 25.56 | 25.76 | 25.60 | 25.64 | 25.77 | 25.91 | 25.79 | 25.82 | 26.19 | 26.14 | 26.21 | 26.18   |
| 49 | Me-QRP-00048 | 29.28 | 29.15 | 29.18 | 29.21 | 35.40 | 35.40 | 35.73 | 35.51 | 37.53 | 37.60 | N/A   | #VALUE! |
| 50 | Me-QRP-00049 | 29.02 | 29.18 | 29.28 | 29.16 | 28.22 | 28.24 | 28.22 | 28.23 | 27.91 | 27.80 | 27.89 | 27.87   |
| 51 | Me-QRP-00050 | 28.54 | 28.39 | 28.58 | 28.50 | N/A   | 34.06 | 33.55 | 33.81 | 32.83 | 32.82 | 32.46 | 32.70   |
| 52 | Me-QRP-00051 | 0.00  | 0.00  | 0.00  | 0.00  | 0.00  | 0.00  | 0.00  | 0.00  | 0.00  | 0.00  | 0.00  | 0.00    |
| 53 | Me-QRP-00052 | 26.21 | 26.42 | 26.29 | 26.31 | 25.46 | 25.69 | 25.54 | 25.56 | 25.01 | 25.17 | 25.15 | 25.11   |
| 54 | Me-QRP-00053 | 23.91 | 23.89 | 23.87 | 23.89 | 21.55 | 21.69 | 21.58 | 21.61 | 24.20 | 24.20 | 24.16 | 24.19   |
| 55 | Me-QRP-00054 | 24.33 | 24.50 | 24.55 | 24.46 | 25.84 | 25.59 | 25.04 | 25.49 | 27.75 | 27.76 | 27.59 | 27.70   |
| 56 | Me-QRP-00055 | 24.10 | 24.31 | 24.13 | 24.18 | 25.70 | 25.82 | 25.80 | 25.78 | 27.25 | 27.33 | 27.39 | 27.32   |
| 57 | Me-QRP-00056 | 26.12 | 26.33 | 26.21 | 26.22 | 27.54 | 27.44 | 27.72 | 27.57 | 28.10 | 27.89 | 28.11 | 28.04   |
| 58 | Me-QRP-00053 | 23.91 | 23.89 | 23.87 | 23.89 | 21.55 | 21.69 | 21.58 | 21.61 | 24.20 | 24.20 | 24.16 | 24.19   |
| 59 | Me-QRP-00058 | 19.74 | 19.78 | 19.77 | 19.76 | 24.16 | 24.77 | 24.95 | 24.63 | 21.78 | 21.89 | 21.89 | 21.85   |
| 60 | Me-QRP-00004 | 28.82 | 28.97 | 28.56 | 28.78 | 25.85 | 25.88 | 25.89 | 25.87 | 26.21 | 26.20 | 26.26 | 26.22   |
| 61 | Me-QRP-00060 | 25.75 | 25.90 | 25.83 | 25.83 | 25.72 | 25.75 | 25.80 | 25.76 | 26.56 | 26.59 | 26.78 | 26.64   |
| 62 | Me-QRP-00061 | 22.99 | 23.37 | 23.14 | 23.17 | 24.11 | 24.17 | 24.01 | 24.10 | 25.22 | 25.11 | 25.15 | 25.16   |
| 63 | Me-QRP-00062 | 0.00  | 0.00  | 0.00  | 0.00  | 0.00  | 0.00  | 0.00  | 0.00  | 0.00  | 0.00  | 0.00  | 0.00    |
| 64 | Me-QRP-00063 | 0.00  | 0.00  | 0.00  | 0.00  | 0.00  | 0.00  | 0.00  | 0.00  | 0.00  | 0.00  | 0.00  | 0.00    |
| 65 | Me-QRP-00064 | 26.30 | 26.29 | 26.29 | 26.29 | 29.92 | 29.78 | 29.89 | 29.86 | 30.08 | 29.87 | 29.84 | 29.93   |
| 66 | Me-QRP-00065 | 25.30 | 25.31 | 25.43 | 25.35 | 26.88 | 26.93 | 26.70 | 26.84 | 29.79 | 29.80 | 29.79 | 29.79   |
| 67 | Me-QRP-00066 | 0.00  | 0.00  | 0.00  | 0.00  | 0.00  | 0.00  | 0.00  | 0.00  | 0.00  | 0.00  | 0.00  | 0.00    |
| 68 | Me-QRP-00067 | 0.00  | 0.00  | 0.00  | 0.00  | 0.00  | 0.00  | 0.00  | 0.00  | 0.00  | 0.00  | 0.00  | 0.00    |
| 69 | Me-QRP-00068 | 0.00  | 0.00  | 0.00  | 0.00  | 0.00  | 0.00  | 0.00  | 0.00  | 0.00  | 0.00  | 0.00  | 0.00    |
| 70 | Me-QRP-00008 | 25.74 | 25.75 | 25.74 | 25.74 | 25.86 | 25.94 | 25.93 | 25.91 | 27.66 | 27.70 | 27.77 | 27.71   |
| 71 | Me-QRP-00070 | 0.00  | 0.00  | 0.00  | 0.00  | 0.00  | 0.00  | 0.00  | 0.00  | 0.00  | 0.00  | 0.00  | 0.00    |
| 72 | Me-QRP-00071 | 25.68 | 25.94 | 25.72 | 25.78 | 23.77 | 23.99 | 23.84 | 23.87 | 25.19 | 24.94 | 25.05 | 25.06   |
| 73 | Me-QRP-00072 | 0.00  | 0.00  | 0.00  | 0.00  | 0.00  | 0.00  | 0.00  | 0.00  | 0.00  | 0.00  | 0.00  | 0.00    |
| 74 | Me-QRP-00073 | 25.76 | 25.52 | 25.88 | 25.72 | 25.17 | 25.06 | 25.07 | 25.10 | 26.46 | 26.44 | 26.56 | 26.49   |
| 75 | Me-QRP-00074 | 27.31 | 27.36 | 27.31 | 27.33 | 28.61 | 28.62 | 28.60 | 28.61 | 29.46 | 29.88 | 29.58 | 29.64   |
| 76 | Me-QRP-00075 | 22.55 | 22.56 | 22.82 | 22.64 | 23.65 | 23.69 | 23.65 | 23.66 | 24.30 | 24.41 | 24.41 | 24.37   |
| 77 | Me-QRP-00076 | 24.52 | 24.40 | 24.59 | 24.51 | 26.29 | 26.17 | 26.23 | 26.23 | 28.08 | 28.08 | 28.17 | 28.11   |
| 78 | Me-QRP-00077 | 25.01 | 25.21 | 25.11 | 25.11 | 24.79 | 24.85 | 24.72 | 24.79 | 26.53 | 26.64 | 26.71 | 26.62   |
| 79 | Me-QRP-00078 | 25.00 | 25.29 | 25.23 | 25.18 | 25.79 | 25.88 | 25.89 | 25.86 | 27.91 | 27.96 | 27.96 | 27.94   |
| 80 | Me-QRP-00079 | 25.00 | 25.29 | 25.23 | 25.18 | 25.79 | 25.88 | 25.89 | 25.86 | 27.91 | 27.96 | 27.96 | 27.94   |
| 81 | Me-QRP-00080 | 28.69 | 28.56 | 28.72 | 28.66 | 28.20 | 28.02 | 28.11 | 28.11 | 29.56 | 29.47 | 29.69 | 29.57   |
| 82 | Me-QRP-00081 | 25.75 | 26.22 | 26.20 | 26.06 | 27.79 | 27.64 | 27.58 | 27.67 | 27.15 | 28.78 | 27.88 | 27.93   |

|     |              |       |       |       |       |       |       |       |       |       |       |       |       |
|-----|--------------|-------|-------|-------|-------|-------|-------|-------|-------|-------|-------|-------|-------|
| 83  | Me-QRP-00082 | 25.55 | 25.69 | 25.81 | 25.68 | 27.12 | 26.98 | 27.10 | 27.06 | 28.58 | 28.72 | 28.92 | 28.74 |
| 84  | Me-QRP-00083 | 24.99 | 25.04 | 24.99 | 25.01 | 25.57 | 25.46 | 25.46 | 25.50 | 26.31 | 26.39 | 26.39 | 26.36 |
| 85  | Me-QRP-00084 | 24.69 | 24.77 | 24.74 | 24.73 | 26.12 | 26.05 | 25.91 | 26.02 | 28.59 | 28.61 | 28.61 | 28.60 |
| 86  | Me-QRP-00085 | 24.64 | 24.75 | 24.73 | 24.71 | 25.46 | 25.33 | 25.29 | 25.36 | 26.88 | 26.96 | 26.94 | 26.93 |
| 87  | Me-QRP-00086 | 24.53 | 24.46 | 24.54 | 24.51 | 24.66 | 24.66 | 24.65 | 24.66 | 25.32 | 25.43 | 25.45 | 25.40 |
| 88  | Me-QRP-00075 | 22.55 | 22.56 | 22.82 | 22.64 | 23.65 | 23.69 | 23.65 | 23.66 | 24.30 | 24.41 | 24.41 | 24.37 |
| 89  | Me-QRP-00088 | 23.69 | 23.92 | 24.08 | 23.90 | 22.47 | 22.33 | 22.34 | 22.38 | 23.53 | 23.50 | 23.47 | 23.50 |
| 90  | Me-QRP-00089 | 24.31 | 24.29 | 24.42 | 24.34 | 26.32 | 26.14 | 25.95 | 26.14 | 30.34 | 30.73 | 30.34 | 30.47 |
| 91  | Me-QRP-00090 | 27.14 | 27.28 | 27.35 | 27.26 | 28.38 | 28.15 | 28.14 | 28.22 | 30.56 | 30.57 | 30.63 | 30.59 |
| 92  | Me-QRP-00091 | 23.72 | 23.75 | 23.59 | 23.69 | 25.15 | 25.06 | 25.06 | 25.09 | 26.46 | 26.25 | 26.51 | 26.41 |
| 93  | Me-QRP-00092 | 24.40 | 24.33 | 24.55 | 24.43 | 26.30 | 26.28 | 26.22 | 26.27 | 27.76 | 27.84 | 27.80 | 27.80 |
| 94  | Me-QRP-00093 | 24.26 | 24.31 | 24.49 | 24.36 | 26.02 | 25.93 | 25.94 | 25.96 | 27.08 | 27.18 | 26.94 | 27.07 |
| 95  | Me-QRP-00094 | 26.92 | 27.16 | 27.29 | 27.12 | 27.14 | 27.13 | 26.94 | 27.07 | 28.84 | 28.92 | 28.84 | 28.86 |
| 96  | Me-QRP-00095 | 24.38 | N/A   | 24.53 | ##### | 25.51 | 25.50 | 25.44 | 25.48 | 27.90 | 27.97 | 27.93 | 27.93 |
| 97  | Me-QRP-00096 | 25.26 | 25.37 | 25.44 | 25.36 | 26.64 | 26.61 | 26.75 | 26.67 | 28.99 | 29.10 | 29.20 | 29.10 |
| 98  | Me-QRP-00097 | 0.00  | 0.00  | 0.00  | 0.00  | 0.00  | 0.00  | 0.00  | 0.00  | 0.00  | 0.00  | 0.00  | 0.00  |
| 99  | Me-QRP-00098 | 24.92 | 24.96 | 25.05 | 24.97 | 25.97 | 25.97 | 25.91 | 25.95 | 26.95 | 26.99 | 26.99 | 26.98 |
| 100 | Me-QRP-00099 | 26.30 | 26.26 | 26.22 | 26.26 | 26.25 | 33.25 | 26.38 | 26.32 | 26.88 | 26.91 | 26.87 | 26.89 |
| 101 | Me-QRP-00100 | 0.00  | 0.00  | 0.00  | 0.00  | 0.00  | 0.00  | 0.00  | 0.00  | 0.00  | 0.00  | 0.00  | 0.00  |
| 102 | Me-QRP-00101 | 32.87 | 32.94 | 32.59 | 32.80 | 33.14 | 32.89 | 32.92 | 32.99 | 34.52 | 35.03 | 34.46 | 34.67 |
| 103 | Me-QRP-00102 | 27.32 | 26.84 | 26.94 | 27.03 | 25.18 | 24.96 | 24.97 | 25.04 | 27.53 | 26.88 | 26.83 | 27.08 |
| 104 | Me-QRP-00103 | 25.96 | 25.89 | 25.90 | 25.92 | 26.88 | 26.76 | 26.74 | 26.79 | 27.59 | 27.65 | 27.46 | 27.57 |
| 105 | Me-QRP-00104 | 25.39 | 25.56 | 25.74 | 25.56 | 25.84 | 25.58 | 25.63 | 25.68 | 27.84 | 27.85 | 27.89 | 27.86 |
| 106 | Me-QRP-00105 | 25.05 | 25.04 | 25.06 | 25.05 | 25.88 | 25.76 | 25.64 | 25.76 | 28.10 | 28.03 | 28.03 | 28.05 |
| 107 | Me-QRP-00106 | 27.20 | 27.13 | 27.15 | 27.16 | 26.60 | 26.45 | 26.29 | 26.45 | 28.28 | 28.38 | 28.23 | 28.29 |

| Supplementary Table S10 qPCR cycles of the genes in F01 at root maturity |              |            |       |       |        |           |       |       |        |           |       |       |        |
|--------------------------------------------------------------------------|--------------|------------|-------|-------|--------|-----------|-------|-------|--------|-----------|-------|-------|--------|
|                                                                          | Sample       | F01 leaves |       |       |        | F01 stems |       |       |        | F01 roots |       |       |        |
|                                                                          | primer ID    | Ct1        | Ct2   | Ct3   | Ave.Ct | Ct1       | Ct2   | Ct3   | Ave.Ct | Ct1       | Ct2   | Ct3   | Ave.Ct |
| 1                                                                        | Me-QRP-90001 | 21.00      | 21.05 | 21.26 | 21.10  | 23.47     | 23.50 | 23.79 | 23.59  | 22.84     | 22.88 | 23.05 | 22.92  |
| 2                                                                        | Me-QRP-00001 | 20.74      | 20.86 | 20.92 | 20.84  | 25.42     | 25.42 | 25.79 | 25.54  | 24.56     | 24.74 | 24.61 | 24.64  |
| 3                                                                        | Me-QRP-00002 | 24.23      | 24.16 | 24.42 | 24.27  | 25.82     | 25.79 | 26.04 | 25.89  | 24.62     | 24.62 | 24.65 | 24.63  |
| 4                                                                        | Me-QRP-00003 | 0.00       | 0.00  | 0.00  | 0.00   | 0.00      | 0.00  | 0.00  | 0.00   | 0.00      | 0.00  | 0.00  | 0.00   |
| 5                                                                        | Me-QRP-00004 | 26.78      | 26.89 | 27.01 | 26.89  | 27.32     | 27.30 | 27.67 | 27.43  | 25.06     | 25.08 | 25.06 | 25.07  |
| 6                                                                        | Me-QRP-00005 | 23.07      | 23.17 | 23.26 | 23.17  | 23.47     | 23.38 | 23.99 | 23.62  | 23.10     | 23.08 | 23.23 | 23.14  |
| 7                                                                        | Me-QRP-00006 | 24.20      | 24.32 | 24.57 | 24.37  | 26.09     | 25.97 | 26.33 | 26.13  | 25.91     | 25.97 | 26.02 | 25.97  |
| 8                                                                        | Me-QRP-00007 | 24.59      | 24.71 | 24.94 | 24.75  | 26.64     | 26.66 | 26.96 | 26.75  | 26.63     | 26.55 | 26.57 | 26.58  |
| 9                                                                        | Me-QRP-00008 | 24.86      | 25.11 | 25.24 | 25.07  | 27.01     | 27.02 | 27.23 | 27.09  | 26.66     | 26.76 | 26.79 | 26.74  |
| 10                                                                       | Me-QRP-00009 | 27.71      | 27.79 | 27.84 | 27.78  | N/A       | 37.67 | 37.40 | 37.54  | 28.30     | 27.95 | 27.92 | 28.06  |
| 11                                                                       | Me-QRP-00010 | 30.03      | 29.27 | 29.73 | 29.68  | 30.85     | 31.22 | 31.21 | 31.09  | 30.33     | 30.54 | 30.25 | 30.37  |
| 12                                                                       | Me-QRP-00011 | 22.61      | 22.64 | 22.98 | 22.74  | 25.26     | 25.65 | 26.05 | 25.65  | 24.66     | 24.58 | 24.60 | 24.61  |
| 13                                                                       | Me-QRP-00012 | 19.83      | 19.98 | 20.33 | 20.05  | 25.64     | 25.91 | 26.29 | 25.95  | 27.74     | 27.67 | 27.83 | 27.75  |
| 14                                                                       | Me-QRP-00013 | 25.47      | 24.96 | 25.10 | 25.18  | 24.12     | 24.23 | 24.19 | 24.18  | 24.73     | 24.62 | 24.64 | 24.66  |
| 15                                                                       | Me-QRP-00014 | 22.53      | 22.50 | 22.56 | 22.53  | 23.25     | 23.45 | 23.46 | 23.39  | 23.13     | 22.97 | 22.96 | 23.02  |
| 16                                                                       | Me-QRP-00015 | 24.15      | 23.59 | 23.74 | 23.82  | 24.89     | 24.88 | 24.88 | 24.88  | 24.04     | 23.98 | 24.02 | 24.01  |
| 17                                                                       | Me-QRP-00016 | 24.13      | 24.21 | 24.72 | 24.35  | 24.46     | 24.89 | 25.30 | 24.88  | 24.21     | 24.27 | 24.25 | 24.24  |
| 18                                                                       | Me-QRP-00017 | 21.79      | 22.05 | 22.32 | 22.05  | 22.86     | 23.17 | 23.91 | 23.31  | 22.37     | 22.55 | 22.47 | 22.46  |
| 19                                                                       | Me-QRP-00018 | 24.82      | 24.92 | 25.44 | 25.06  | 24.57     | 25.21 | 25.77 | 25.18  | 23.77     | 23.84 | 23.91 | 23.84  |
| 20                                                                       | Me-QRP-00019 | 25.96      | 25.98 | 26.40 | 26.11  | 26.96     | 27.25 | 27.72 | 27.31  | 25.70     | 25.73 | 25.78 | 25.74  |
| 21                                                                       | Me-QRP-00020 | 24.63      | 24.82 | 25.09 | 24.84  | 27.39     | 27.91 | 28.15 | 27.82  | 27.03     | 27.09 | 27.03 | 27.05  |
| 22                                                                       | Me-QRP-00021 | 28.33      | 28.67 | 28.97 | 28.66  | 30.79     | 31.30 | 31.49 | 31.19  | 30.15     | 30.31 | 30.70 | 30.39  |
| 23                                                                       | Me-QRP-00022 | 22.09      | 22.25 | 22.64 | 22.33  | 23.20     | 23.51 | 23.96 | 23.56  | 23.26     | 23.21 | 23.21 | 23.23  |
| 24                                                                       | Me-QRP-00023 | 24.79      | 24.85 | 25.27 | 24.97  | 26.63     | 27.12 | 27.60 | 27.12  | 26.43     | 26.50 | 26.53 | 26.48  |
| 25                                                                       | Me-QRP-00024 | 25.91      | 25.96 | 26.45 | 26.11  | 27.81     | 28.16 | 28.48 | 28.15  | 26.31     | 26.32 | 26.51 | 26.38  |
| 26                                                                       | Me-QRP-00025 | 33.83      | 34.10 | 33.50 | 33.81  | 34.14     | 34.98 | 34.91 | 34.68  | 33.91     | 33.90 | 34.01 | 33.94  |
| 27                                                                       | Me-QRP-00026 | 27.46      | 27.35 | 27.41 | 27.41  | 30.16     | 30.64 | 30.64 | 30.48  | 26.47     | 26.51 | 26.49 | 26.49  |
| 28                                                                       | Me-QRP-00027 | 23.94      | 23.89 | 23.95 | 23.93  | 26.29     | 26.39 | 26.39 | 26.36  | 26.66     | 26.65 | 26.62 | 26.65  |
| 29                                                                       | Me-QRP-00028 | 33.58      | 33.15 | 33.22 | 33.31  | 36.67     | 35.81 | 36.92 | 36.47  | 36.09     | 35.22 | 35.71 | 35.67  |
| 30                                                                       | Me-QRP-00029 | 0.00       | 0.00  | 0.00  | 0.00   | 0.00      | 0.00  | 0.00  | 0.00   | 0.00      | 0.00  | 0.00  | 0.00   |
| 31                                                                       | Me-QRP-00030 | 26.75      | 26.87 | 27.08 | 26.90  | 28.91     | 29.12 | 29.44 | 29.16  | 29.25     | 29.20 | 29.28 | 29.24  |
| 32                                                                       | Me-QRP-00031 | 27.66      | 27.14 | 27.52 | 27.44  | 29.57     | 29.58 | 29.76 | 29.64  | 29.42     | 29.55 | 29.57 | 29.51  |
| 33                                                                       | Me-QRP-00032 | 25.50      | 25.67 | 25.87 | 25.68  | 26.95     | 27.04 | 27.51 | 27.17  | 25.94     | 26.00 | 25.98 | 25.97  |
| 34                                                                       | Me-QRP-00033 | 24.95      | 25.18 | 25.26 | 25.13  | 25.21     | 25.20 | 25.56 | 25.32  | 25.13     | 25.11 | 25.12 | 25.12  |
| 35                                                                       | Me-QRP-00034 | 31.26      | 31.63 | 32.00 | 31.63  | 29.01     | 28.75 | 31.19 | 29.65  | 30.83     | 31.27 | 30.80 | 30.97  |
| 36                                                                       | Me-QRP-00035 | 0.00       | 0.00  | 0.00  | 0.00   | 0.00      | 0.00  | 0.00  | 0.00   | 0.00      | 0.00  | 0.00  | 0.00   |
| 37                                                                       | Me-QRP-00036 | 0.00       | 0.00  | 0.00  | 0.00   | 0.00      | 0.00  | 0.00  | 0.00   | 0.00      | 0.00  | 0.00  | 0.00   |
| 38                                                                       | Me-QRP-00037 | 29.72      | 29.82 | 29.99 | 29.84  | 30.92     | 31.10 | 31.39 | 31.14  | 30.92     | 30.86 | 30.88 | 30.89  |
| 39                                                                       | Me-QRP-00038 | 27.96      | 27.63 | 27.77 | 27.79  | 29.11     | 29.35 | 29.43 | 29.30  | 30.64     | 30.23 | 30.17 | 30.34  |

|    |              |       |       |       |       |       |       |       |       |       |       |       |       |
|----|--------------|-------|-------|-------|-------|-------|-------|-------|-------|-------|-------|-------|-------|
| 40 | Me-QRP-00039 | 0.00  | 0.00  | 0.00  | 0.00  | 0.00  | 0.00  | 0.00  | 0.00  | 0.00  | 0.00  | 0.00  | 0.00  |
| 41 | Me-QRP-00040 | 35.06 | 35.07 | 34.73 | 34.95 | 34.79 | 36.64 | 36.35 | 35.92 | 36.42 | 35.35 | 34.28 | 35.35 |
| 42 | Me-QRP-00041 | 23.66 | 23.82 | 23.92 | 23.80 | 23.90 | 23.81 | 24.14 | 23.95 | 22.11 | 22.12 | 22.14 | 22.12 |
| 43 | Me-QRP-00042 | 29.92 | 29.84 | 30.09 | 29.95 | 31.09 | 30.93 | 31.11 | 31.04 | 30.81 | 30.89 | 30.87 | 30.86 |
| 44 | Me-QRP-00043 | 24.24 | 23.82 | 23.95 | 24.00 | 25.46 | 25.64 | 25.66 | 25.59 | 24.95 | 24.96 | 24.98 | 24.97 |
| 45 | Me-QRP-00044 | 0.00  | 0.00  | 0.00  | 0.00  | 0.00  | 0.00  | 0.00  | 0.00  | 0.00  | 0.00  | 0.00  | 0.00  |
| 46 | Me-QRP-00045 | 23.80 | 23.73 | 23.92 | 23.82 | 26.27 | 26.09 | 26.46 | 26.27 | 26.72 | 26.72 | 26.74 | 26.73 |
| 47 | Me-QRP-00046 | 26.11 | 26.04 | 26.32 | 26.16 | 29.47 | 29.34 | 29.84 | 29.55 | 31.08 | 30.89 | 31.07 | 31.01 |
| 48 | Me-QRP-00047 | 24.92 | 24.96 | 25.13 | 25.01 | 25.48 | 25.38 | 25.76 | 25.54 | 25.18 | 25.20 | 25.33 | 25.24 |
| 49 | Me-QRP-00048 | 29.18 | 28.92 | 28.91 | 29.00 | 34.23 | 33.59 | 34.57 | 34.13 | 33.58 | 33.42 | 33.92 | 33.64 |
| 50 | Me-QRP-00049 | 27.99 | 28.81 | 28.93 | 28.57 | 29.43 | 29.28 | 29.57 | 29.43 | 27.42 | 27.34 | 27.34 | 27.37 |
| 51 | Me-QRP-00050 | 29.74 | 28.82 | 28.98 | 29.18 | 34.79 | 34.46 | 33.64 | 34.30 | 30.80 | 30.70 | 30.60 | 30.70 |
| 52 | Me-QRP-00051 | 0.00  | 0.00  | 0.00  | 0.00  | 0.00  | 0.00  | 0.00  | 0.00  | 0.00  | 0.00  | 0.00  | 0.00  |
| 53 | Me-QRP-00052 | 25.96 | 26.03 | 26.20 | 26.06 | 26.94 | 27.08 | 27.37 | 27.13 | 24.64 | 24.52 | 24.76 | 24.64 |
| 54 | Me-QRP-00053 | 24.48 | 24.56 | 24.59 | 24.54 | 21.16 | 21.18 | 21.36 | 21.23 | 25.07 | 25.07 | 25.19 | 25.11 |
| 55 | Me-QRP-00054 | 24.00 | 23.92 | 23.96 | 23.96 | 26.30 | 26.61 | 26.61 | 26.51 | 26.40 | 26.47 | 26.47 | 26.44 |
| 56 | Me-QRP-00055 | 23.62 | 23.75 | 23.83 | 23.73 | 26.57 | 26.39 | 26.45 | 26.47 | 26.36 | 26.47 | 26.49 | 26.44 |
| 57 | Me-QRP-00056 | 26.50 | 26.49 | 26.82 | 26.61 | 28.93 | 28.86 | 29.15 | 28.98 | 27.81 | 27.75 | 27.89 | 27.82 |
| 58 | Me-QRP-00053 | 24.48 | 24.56 | 24.59 | 24.54 | 21.16 | 21.18 | 21.36 | 21.23 | 25.07 | 25.07 | 25.19 | 25.11 |
| 59 | Me-QRP-00058 | 21.18 | 21.49 | 21.50 | 21.39 | 23.72 | 23.92 | 24.33 | 23.99 | 23.50 | 22.49 | 23.84 | 23.28 |
| 60 | Me-QRP-00004 | 26.78 | 26.89 | 27.01 | 26.89 | 27.32 | 27.30 | 27.67 | 27.43 | 25.06 | 25.08 | 25.06 | 25.07 |
| 61 | Me-QRP-00060 | 24.04 | 24.05 | 24.37 | 24.16 | 25.27 | 25.21 | 25.56 | 25.35 | 25.48 | 25.66 | 25.68 | 25.61 |
| 62 | Me-QRP-00061 | 21.98 | 22.01 | 22.10 | 22.03 | 24.66 | 24.13 | 24.43 | 24.41 | 24.84 | 24.66 | 24.12 | 24.54 |
| 63 | Me-QRP-00062 | 0.00  | 0.00  | 0.00  | 0.00  | 0.00  | 0.00  | 0.00  | 0.00  | 0.00  | 0.00  | 0.00  | 0.00  |
| 64 | Me-QRP-00063 | 0.00  | 0.00  | 0.00  | 0.00  | 0.00  | 0.00  | 0.00  | 0.00  | 0.00  | 0.00  | 0.00  | 0.00  |
| 65 | Me-QRP-00064 | 26.07 | 26.00 | 26.13 | 26.07 | 29.33 | 29.25 | 29.47 | 29.35 | 30.12 | 30.18 | 30.13 | 30.14 |
| 66 | Me-QRP-00065 | 24.74 | 24.82 | 24.84 | 24.80 | 26.50 | 26.69 | 26.67 | 26.62 | 28.68 | 28.88 | 28.74 | 28.77 |
| 67 | Me-QRP-00066 | 0.00  | 0.00  | 0.00  | 0.00  | 0.00  | 0.00  | 0.00  | 0.00  | 0.00  | 0.00  | 0.00  | 0.00  |
| 68 | Me-QRP-00067 | 0.00  | 0.00  | 0.00  | 0.00  | 0.00  | 0.00  | 0.00  | 0.00  | 0.00  | 0.00  | 0.00  | 0.00  |
| 69 | Me-QRP-00068 | 0.00  | 0.00  | 0.00  | 0.00  | 0.00  | 0.00  | 0.00  | 0.00  | 0.00  | 0.00  | 0.00  | 0.00  |
| 70 | Me-QRP-00008 | 24.86 | 25.11 | 25.24 | 25.07 | 27.01 | 27.02 | 27.23 | 27.09 | 26.66 | 26.76 | 26.79 | 26.74 |
| 71 | Me-QRP-00070 | 0.00  | 0.00  | 0.00  | 0.00  | 0.00  | 0.00  | 0.00  | 0.00  | 0.00  | 0.00  | 0.00  | 0.00  |
| 72 | Me-QRP-00071 | 23.53 | 23.48 | 23.68 | 23.56 | 24.01 | 23.94 | 24.26 | 24.07 | 23.61 | 23.75 | 23.70 | 23.69 |
| 73 | Me-QRP-00072 | 0.00  | 0.00  | 0.00  | 0.00  | 0.00  | 0.00  | 0.00  | 0.00  | 0.00  | 0.00  | 0.00  | 0.00  |
| 74 | Me-QRP-00073 | 24.96 | 24.89 | 24.89 | 24.91 | 26.36 | 26.65 | 26.66 | 26.56 | 26.39 | 25.36 | 25.44 | 25.73 |
| 75 | Me-QRP-00074 | 27.72 | 27.29 | 27.72 | 27.58 | 30.46 | 30.31 | 30.27 | 30.34 | 28.83 | 28.76 | 28.65 | 28.75 |
| 76 | Me-QRP-00075 | 22.90 | 22.50 | 22.76 | 22.72 | 24.61 | 24.78 | 24.79 | 24.72 | 23.50 | 23.57 | 23.59 | 23.55 |
| 77 | Me-QRP-00076 | 24.99 | 24.69 | 24.75 | 24.81 | 26.70 | 26.87 | 26.82 | 26.80 | 26.87 | 26.99 | 27.14 | 27.00 |
| 78 | Me-QRP-00077 | 23.76 | 23.76 | 23.94 | 23.82 | 25.78 | 25.71 | 25.98 | 25.82 | 25.79 | 25.85 | 25.87 | 25.84 |
| 79 | Me-QRP-00078 | 25.12 | 25.07 | 25.38 | 25.19 | 26.78 | 26.83 | 27.14 | 26.92 | 26.74 | 26.83 | 26.88 | 26.82 |
| 80 | Me-QRP-00079 | 25.12 | 25.07 | 25.38 | 25.19 | 26.78 | 26.83 | 27.14 | 26.92 | 26.74 | 26.83 | 26.88 | 26.82 |
| 81 | Me-QRP-00080 | 28.02 | 27.88 | 28.17 | 28.03 | 29.72 | 30.04 | 29.85 | 29.87 | 28.53 | 28.69 | 28.54 | 28.58 |
| 82 | Me-QRP-00081 | 26.71 | 25.75 | 26.07 | 26.18 | 27.76 | 27.85 | 28.20 | 27.94 | 27.38 | 28.13 | 26.86 | 27.46 |

|     |              |       |       |       |       |       |       |       |       |       |       |       |       |
|-----|--------------|-------|-------|-------|-------|-------|-------|-------|-------|-------|-------|-------|-------|
| 83  | Me-QRP-00082 | 26.15 | 25.77 | 25.86 | 25.93 | 27.50 | 27.72 | 27.74 | 27.65 | 27.84 | 27.82 | 27.70 | 27.79 |
| 84  | Me-QRP-00083 | 24.26 | 24.28 | 24.25 | 24.26 | 25.59 | 25.83 | 25.89 | 25.77 | 25.32 | 25.35 | 25.39 | 25.35 |
| 85  | Me-QRP-00084 | 24.14 | 24.16 | 24.19 | 24.16 | 27.08 | 27.24 | 27.33 | 27.22 | 27.73 | 27.71 | 27.59 | 27.68 |
| 86  | Me-QRP-00085 | 24.07 | 24.13 | 24.07 | 24.09 | 26.30 | 26.48 | 26.43 | 26.40 | 25.79 | 25.82 | 25.84 | 25.82 |
| 87  | Me-QRP-00086 | 24.27 | 23.88 | 24.00 | 24.05 | 25.23 | 25.44 | 25.42 | 25.36 | 24.43 | 24.51 | 24.41 | 24.45 |
| 88  | Me-QRP-00075 | 22.90 | 22.50 | 22.76 | 22.72 | 24.61 | 24.78 | 24.79 | 24.72 | 23.50 | 23.57 | 23.59 | 23.55 |
| 89  | Me-QRP-00088 | 23.38 | 23.41 | 23.39 | 23.39 | 23.51 | 23.71 | 23.72 | 23.64 | 22.18 | 22.15 | 22.14 | 22.16 |
| 90  | Me-QRP-00089 | 24.09 | 24.12 | 24.12 | 24.11 | 27.47 | 27.60 | 27.49 | 27.52 | 28.81 | 28.86 | 28.85 | 28.84 |
| 91  | Me-QRP-00090 | 27.83 | 27.52 | 27.67 | 27.68 | 29.16 | 29.59 | 29.33 | 29.36 | 29.69 | 29.53 | 29.56 | 29.59 |
| 92  | Me-QRP-00091 | 25.22 | 24.74 | 24.99 | 24.98 | 26.77 | 26.87 | 26.89 | 26.84 | 25.17 | 25.59 | 25.14 | 25.30 |
| 93  | Me-QRP-00092 | 23.98 | 23.85 | 23.88 | 23.90 | 27.16 | 27.52 | 27.39 | 27.36 | 26.95 | 26.89 | 26.93 | 26.92 |
| 94  | Me-QRP-00093 | 24.08 | 23.86 | 23.87 | 23.94 | 27.13 | 27.25 | 27.26 | 27.22 | 26.34 | 26.47 | 26.33 | 26.38 |
| 95  | Me-QRP-00094 | 25.94 | 25.99 | 26.02 | 25.98 | 28.37 | 28.47 | 28.38 | 28.41 | 28.16 | 28.18 | 28.16 | 28.17 |
| 96  | Me-QRP-00095 | 25.03 | 24.67 | 24.75 | 24.82 | 26.76 | 26.87 | 26.93 | 26.85 | 27.26 | 27.24 | 27.27 | 27.26 |
| 97  | Me-QRP-00096 | 25.18 | 24.74 | 24.94 | 24.95 | 27.82 | 27.79 | 27.96 | 27.86 | 27.81 | 27.81 | 27.78 | 27.80 |
| 98  | Me-QRP-00097 | 0.00  | 0.00  | 0.00  | 0.00  | 0.00  | 0.00  | 0.00  | 0.00  | 0.00  | 0.00  | 0.00  | 0.00  |
| 99  | Me-QRP-00098 | 24.91 | 24.48 | 24.55 | 24.65 | 26.46 | 26.64 | 26.63 | 26.58 | 25.71 | 25.65 | 25.61 | 25.66 |
| 100 | Me-QRP-00099 | 28.11 | 28.29 | 28.01 | 28.14 | 26.79 | 26.38 | 26.42 | 26.53 | 28.20 | 28.12 | 28.04 | 28.12 |
| 101 | Me-QRP-00100 | 0.00  | 0.00  | 0.00  | 0.00  | 0.00  | 0.00  | 0.00  | 0.00  | 0.00  | 0.00  | 0.00  | 0.00  |
| 102 | Me-QRP-00101 | 31.38 | 31.38 | 31.37 | 31.38 | 32.76 | 32.82 | 32.85 | 32.81 | 32.90 | 33.06 | 32.79 | 32.92 |
| 103 | Me-QRP-00102 | 26.38 | 26.35 | 26.43 | 26.38 | 26.55 | 26.78 | 26.77 | 26.70 | 26.47 | 26.50 | 26.49 | 26.49 |
| 104 | Me-QRP-00103 | 26.65 | 26.08 | 26.35 | 26.36 | 28.45 | 28.56 | 28.66 | 28.56 | 27.59 | 27.56 | 27.54 | 27.56 |
| 105 | Me-QRP-00104 | 23.78 | 23.65 | 23.79 | 23.74 | 26.78 | 26.94 | 26.97 | 26.90 | 26.82 | 26.86 | 26.92 | 26.87 |
| 106 | Me-QRP-00105 | 25.10 | 24.69 | 24.87 | 24.89 | 26.98 | 27.15 | 27.04 | 27.06 | 26.86 | 26.98 | 26.88 | 26.90 |
| 107 | Me-QRP-00106 | 25.83 | 25.79 | 25.86 | 25.83 | 26.72 | 26.81 | 26.78 | 26.77 | 27.23 | 27.32 | 27.27 | 27.27 |
